# Supplementary material for: Vocal biomarker predicts fatigue in people with COVID-19: results from the prospective Predi-COVID cohort study
Source: PubMed Central journal article supplement (PMC9684280; doi:10.1136/bmjopen-2022-062463), 2022-11-22
Supplement: bmjopen-2022-062463.draft_revisions.pdf [file bmjopen-2022-062463.draft_revisions.pdf]

# BMJ Open

BMJ Open is committed to open peer review. As part of this commitment we make the peer review history of every article we publish publicly available.

When an article is published we post the peer reviewers' comments and the authors' responses online. We also post the versions of the paper that were used during peer review. These are the versions that the peer review comments apply to.

The versions of the paper that follow are the versions that were submitted during the peer review process. They are not the versions of record or the final published versions. They should not be cited or distributed as the published version of this manuscript.

BMJ Open is an open access journal and the full, final, typeset and author-corrected version of record of the manuscript is available on our site with no access controls, subscription charges or pay-per-view fees (<http://bmjopen.bmj.com>).

If you have any questions on BMJ Open's open peer review process please email [info.bmjopen@bmj.com](mailto:info.bmjopen@bmj.com)

# BMJ Open

## Development of a vocal biomarker for fatigue monitoring in people with COVID-19

|                               |                                                                                                                                                                                                                                                                                                                                                                                                                                                                                                                                                                                                                                                                                    |
|-------------------------------|------------------------------------------------------------------------------------------------------------------------------------------------------------------------------------------------------------------------------------------------------------------------------------------------------------------------------------------------------------------------------------------------------------------------------------------------------------------------------------------------------------------------------------------------------------------------------------------------------------------------------------------------------------------------------------|
| Journal:                      | <i>BMJ Open</i>                                                                                                                                                                                                                                                                                                                                                                                                                                                                                                                                                                                                                                                                    |
| Manuscript ID                 | bmjopen-2022-062463                                                                                                                                                                                                                                                                                                                                                                                                                                                                                                                                                                                                                                                                |
| Article Type:                 | Original research                                                                                                                                                                                                                                                                                                                                                                                                                                                                                                                                                                                                                                                                  |
| Date Submitted by the Author: | 01-Mar-2022                                                                                                                                                                                                                                                                                                                                                                                                                                                                                                                                                                                                                                                                        |
| Complete List of Authors:     | Elbéji, Abir; Luxembourg Institute of Health, Department of Precision Health<br>Zhang, Lu; Luxembourg Institute of Health, Department of Precision Health<br>Higa, Eduardo; Luxembourg Institute of Health, Department of Precision Health<br>Fischer, Aurélie; Luxembourg Institute of Health, Departement of Population Health<br>Despotovic, Vladimir; Luxembourg Institute of Health, Department of Precision Health<br>Nazarov, Petr V.; Luxembourg Institute of Health, Department of Precision Health<br>Aguayo, Gloria; Luxembourg Institute of Health, Department of Population Health<br>Fagherazzi, Guy; Luxembourg Institute of Health, Department of Precision Health |
| Keywords:                     | COVID-19, Health informatics < BIOTECHNOLOGY & BIOINFORMATICS, Public health < INFECTIOUS DISEASES                                                                                                                                                                                                                                                                                                                                                                                                                                                                                                                                                                                 |
|                               |                                                                                                                                                                                                                                                                                                                                                                                                                                                                                                                                                                                                                                                                                    |

SCHOLARONE™  
Manuscripts

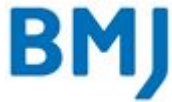

I, the Submitting Author has the right to grant and does grant on behalf of all authors of the Work (as defined in the below author licence), an exclusive licence and/or a non-exclusive licence for contributions from authors who are: i) UK Crown employees; ii) where BMJ has agreed a CC-BY licence shall apply, and/or iii) in accordance with the terms applicable for US Federal Government officers or employees acting as part of their official duties; on a worldwide, perpetual, irrevocable, royalty-free basis to BMJ Publishing Group Ltd ("BMJ") its licensees and where the relevant Journal is co-owned by BMJ to the co-owners of the Journal, to publish the Work in this journal and any other BMJ products and to exploit all rights, as set out in our [licence](#).

The Submitting Author accepts and understands that any supply made under these terms is made by BMJ to the Submitting Author unless you are acting as an employee on behalf of your employer or a postgraduate student of an affiliated institution which is paying any applicable article publishing charge ("APC") for Open Access articles. Where the Submitting Author wishes to make the Work available on an Open Access basis (and intends to pay the relevant APC), the terms of reuse of such Open Access shall be governed by a Creative Commons licence – details of these licences and which [Creative Commons](#) licence will apply to this Work are set out in our licence referred to above.

Other than as permitted in any relevant BMJ Author's Self Archiving Policies, I confirm this Work has not been accepted for publication elsewhere, is not being considered for publication elsewhere and does not duplicate material already published. I confirm all authors consent to publication of this Work and authorise the granting of this licence.

1  
2  
3 **Development of a vocal biomarker for fatigue monitoring in people with**  
4 **COVID-19**  
5

6 Abir Elbéji<sup>1</sup>, Lu Zhang<sup>2</sup>, Eduardo Higa<sup>1</sup>, Aurélie Fischer<sup>1</sup>, Vladimir Despotovic<sup>2</sup>, Petr V.  
7 Nazarov<sup>2</sup>, Gloria A. Aguayo<sup>1</sup>, Guy Fagherazzi<sup>1</sup>  
8  
9

- 10  
11  
12  
13 1. Deep Digital Phenotyping Research Unit. Department of Precision Health.  
14 Luxembourg Institute of Health, 1 A-B rue Thomas Edison, L-1445 Strassen,  
15 Luxembourg  
16  
17 2. Bioinformatics Platform. Luxembourg Institute of Health, 1A-B, rue Thomas Edison,  
18 L-1445 Strassen, Luxembourg  
19  
20  
21  
22  
23  
24  
25

26 **Reprints and correspondence:**

27 Dr Guy Fagherazzi, PhD, ADR  
28 Director of Department of Precision Health  
29 Head of the Deep Digital Phenotyping Research Unit  
30 Luxembourg Institute of Health  
31 1 AB rue Thomas Edison, L-1445 STRASSEN, LUXEMBOURG  
32  
33 Phone: +352 6 21 58 95 54  
34 Email: [guy.fagherazzi@lih.lu](mailto:guy.fagherazzi@lih.lu)  
35  
36 Website: <https://ddp.lih.lu/>  
37  
38  
39  
40  
41  
42  
43  
44  
45  
46  
47  
48  
49  
50  
51  
52  
53  
54  
55  
56  
57  
58  
59  
60

## Abstract

---

### Objective

To develop a vocal biomarker for fatigue monitoring in people with COVID-19.

**Design** Prospective cohort study.

**Setting** Predi-COVID data between May 2020 and May 2021.

### Participants

A total of 1772 voice recordings was used to train an AI-based algorithm to predict fatigue, stratified by gender and smartphone's operating system (Android/iOS). The recordings were collected from 296 participants tracked for two weeks following SARS-CoV-2 infection.

### primary and secondary outcome measures

Four machine learning algorithms (Logistic regression, k-nearest neighbors, support vector machine, and soft voting classifier) were used to train and derive the fatigue vocal biomarker. A t-test was used to evaluate the distribution of the vocal biomarker between the two classes (Fatigue and No fatigue).

### Results

The final study population included 56% of women and had a mean ( $\pm$ SD) age of 40 ( $\pm$ 13) years. Women were more likely to report fatigue ( $P<.001$ ). We developed four models for Android female, Android male, iOS female, and iOS male users with a weighted AUC of 79%, 85%, 86%, 82%, and a mean Brier Score of 0.15, 0.12, 0.17, 0.12, respectively. The vocal biomarker derived from the prediction models successfully discriminated COVID-19 participants with and without fatigue (t-test  $P<.001$ ).

### Conclusions

This study demonstrates the feasibility of identifying and remotely monitoring fatigue thanks to voice. Vocal biomarkers, digitally integrated into telemedicine technologies, are expected to improve the monitoring of people with COVID-19 or Long-COVID.

---

**ClinicalTrials.gov Identifier: NCT0438098**

### Strengths and limitations

-This is the first study supporting the hypothesis that fatigue can be accurately monitored based on voice in people with COVID-19.

-The analyses were based on a multi-lingual database of standardized voice recordings collected in real-life from people with confirmed SARS-CoV-2 infection as determined by PCR.

-There is no similar dataset available yet in the literature to replicate our findings.

-The vocal biomarker is trained on a binary outcome (Fatigue, Yes/No) and does not reflect the entire spectrum of fatigue severity. Further work should be performed in that direction.

## Introduction

Coronavirus disease 2019 (COVID-19) is a global outbreak. More than 199 million confirmed cases of COVID-19 have been detected worldwide as of 4 August 2021, with more than 4 million deaths reported by the World Health Organization<sup>1</sup>. The worldwide population and healthcare systems have been greatly impacted by the COVID-19 pandemic. The pandemic has essentially put whole healthcare systems under pressure, requiring national or regional lockdowns<sup>2</sup>. Finding solutions that allow healthcare providers to focus on the more important and urgent patients, was, and still is, critical.

This outbreak continues to impact people, with many patients suffering from a range of acute symptoms, such as fatigue. Fatigue is a common symptom in patients with COVID-19 that can impact their quality of life, treatment adherence, and can be associated with numerous complications<sup>3</sup>. Recent findings showed that fatigue is a major symptom of the frequently reported Long-COVID syndrome. After recovering from the acute disease caused by the SARS outbreak, up to 60% of patients reported chronic fatigue 12 months later<sup>4</sup>. This supports the need for long-term monitoring solutions for these patients.

In general, fatigue can be of two types: physical and mental<sup>5</sup> experiencing lack of energy, inability to start and perform everyday activities, and lack of desire to do things. In the context of COVID-19, determinants of fatigue were categorized as both central and psychological factors, the latest might also be indirectly caused by pandemic-related fear and anxiety<sup>6,7</sup>.

Fatigue affects men and women differently and has previously been shown to be reported differently in the two genders. Men and women have different anatomy and physiology, resulting in significant sex differences in fatigability<sup>8</sup>.

Telemedicine, artificial intelligence (AI), and big data predictive analytics are examples of digital health technologies that have the potential to minimize the damaging effects of COVID-19 by improving responses to public health problems at a population level<sup>9</sup>. Using telemonitoring technologies to enable self-surveillance and remote monitoring of symptoms might therefore help to improve and personalize COVID-19 care delivery<sup>10</sup>.

1  
2  
3  
4  
5 Voice is a promising source of digital data since it is rich, user-friendly, inexpensive to  
6 collect, and non-invasive, and can be used to develop vocal biomarkers that  
7 characterize disease states. Previous research was mostly conducted in the field of  
8 neurodegenerative diseases, such as Parkinson's disease<sup>11</sup> and Alzheimer's  
9 disease<sup>12</sup>. There are also studies that confirm the relation of voice disorders to fatigue,  
10 e.g., in Chronic Fatigue Syndrome (CFS). Neuromuscular, neuropsychological and  
11 hormonal dysfunction associated with CFS can influence the phonation and  
12 articulation, and alter tension, viscosity and thickness of the tissue of the larynx, tongue  
13 and lips, leading to decreased voice quality<sup>13</sup>. Increased fatigue affects voice  
14 characteristics, such as pitch, word duration<sup>14</sup> and timing of articulated sounds<sup>15</sup>. Vocal  
15 changes related to fatigue are more observed in consonant sounds that require a high  
16 average airflow<sup>16</sup>.

17  
18  
19  
20  
21  
22  
23  
24  
25  
26  
27 In the context of the COVID-19 pandemic, respiratory sounds (e.g coughs, breathing,  
28 and voice) are also used as sources of information to develop COVID-19 screening  
29 tools<sup>17,18,19</sup>. However, no previous work has been devoted to investigating the  
30 association of voice with COVID-19 symptoms.

31  
32  
33  
34 We hypothesized that there is an association between fatigue and voice in patients  
35 with COVID-19 and that it is possible to train an AI-based model to identify fatigue and  
36 subsequently generate a digital vocal biomarker for fatigue monitoring. We used data  
37 from the large hybrid prospective Predi-COVID cohort study to investigate this  
38 hypothesis.

## 39 40 41 42 43 44 45 **Methods**

### 46 47 **Study design**

48 This project uses data from the Predi-COVID study<sup>20</sup>. Predi-COVID is a hybrid cohort  
49 study that started in May 2020 in Luxembourg and involved participants who should  
50 meet all of the following requirements: (1) a signed informed consent form; (2)  
51 participants with confirmed SARS-CoV-2 infection as determined by PCR at one of  
52 Luxembourg's certified laboratories; and (3) 18 years and older.

53  
54  
55  
56  
57  
58 This study combines data from the national surveillance system, which is used for  
59 virtually all COVID-19 positive patients. Biological sampling, electronic patient-



1  
2  
3 reported outcomes, and smartphone voice recording were collected to identify vocal  
4 biomarkers of respiratory syndromes and fatigue in this study. More details about the  
5 Predi-COVID study can be found elsewhere<sup>20</sup>.  
6  
7  
8  
9

10 Health Inspection collaborators made the initial phone contact with potential  
11 participants. Those who consented to participate were contacted by a qualified nurse  
12 from the Clinical and Epidemiological Investigation Center (CIEC - Luxembourg  
13 Institute of Health), who outlined the study and arranged home or hospital visits.  
14  
15  
16  
17

### 18 **Patient and Public Involvement**

19  
20 The Predi-COVID initiative was an emergency response from national research  
21 institutions grouped under 'Research Luxembourg' to fight the COVID-19 pandemic in  
22 Luxembourg and contribute to the general effort in the crisis. Therefore, for timing and  
23 safety reasons, patients with COVID-19 were not directly included to participate in the  
24 study design. However, the first participants included in Predi-COVID provided  
25 feedback on general workflow, data collection, questionnaires, and sampling, which  
26 was taken into account in an amendment to the protocol<sup>20</sup>.  
27  
28  
29  
30  
31  
32  
33

### 34 **Data collection**

35  
36 Participants were followed for up to a year using a smartphone app to collect voice  
37 data. To ensure a minimum quality level, participants were asked to record it in a quiet  
38 environment while maintaining a certain distance from the microphone, and an audio  
39 example of what was required was also provided.  
40  
41  
42  
43

44  
45 All the participants of this study were invited to record two audio types. The first, Type  
46 1 audio, required participants to read paragraph 1 of article 25 of the Declaration of  
47 Human Rights<sup>21</sup>, in their preferred language: French, German, English, or Portuguese;  
48 and the second, Type 2 audio, required them to hold the [a] vowel phonation without  
49 breathing for as long as they could (see Supplementary Online Material 1 for more  
50 details).  
51  
52  
53  
54

55  
56 Predi-COVID collects data in conformity with the German Society of Epidemiology's  
57 best practices guidelines<sup>22</sup>. To draft the manuscript, we followed the TRIPOD criteria  
58  
59  
60

1  
2  
3 for reporting AI-based model development and validation, as well as the corresponding  
4 checklist.  
5  
6  
7

8 All Predi-COVID participants recruited between May 2020 and May 2021 who reported  
9 their fatigue status (“I feel well” as “No Fatigue” and “I am fatigued”/“I don’t feel well”  
10 as “Fatigue”) on the same day as the audio recordings during the 14 days of follow-up  
11 were included in this study<sup>23</sup>. As a result, several audio recordings for a single  
12 participant were available for both audio types<sup>24</sup>.  
13  
14  
15  
16

### 17 **Audio characteristics and vocal biomarker training**

18 The audio recordings were collected in two formats, 3gp format (Android devices) and  
19 m4a format (iOS devices). Based on the smartphone’s operating system and the  
20 user’s gender (male/female), we trained one model for each category. This  
21 stratification was performed to minimize data heterogeneity and deal with sex as a  
22 potential confounding bias.  
23  
24  
25  
26  
27  
28  
29

#### 30 *Audio pre-processing*

31 All of the raw audio recordings were pre-processed (Figure 1). They were initially  
32 converted to .wav files, with audios lasting less than 2 seconds being excluded. Then,  
33 an audio clustering (DBSCAN) on basic features was performed (duration, the  
34 average, sum, and standard deviation of signal power, and fundamental frequency) to  
35 detect the outliers and exclude poor quality audios. Finally, peak normalization was  
36 used to boost the volume of quiet audio segments, and leading and trailing silences  
37 longer than 350 seconds were trimmed.  
38  
39  
40  
41  
42  
43  
44  
45  
46  
47

#### 48 *Feature extraction*

49 We used transfer learning for the feature extraction process since it is adapted for  
50 small training databases<sup>25</sup>. Transfer learning is a technique where a model is  
51 constructed and trained with a set containing a large amount of data and then transfer  
52 and apply this learning to our dataset on top of it. It has the advantage of reducing the  
53 amount of data required while shortening training time and improving performance  
54 when compared to models built from scratch<sup>26</sup>.  
55  
56  
57  
58  
59  
60

1  
2  
3 Convolutional neural networks require a fixed input size, whereas audio instances in  
4 our dataset were of variable length. To deal with this issue, Zero-padding was used to  
5 set the duration of each audio file to 50 seconds (the maximum length in our database).  
6  
7 To raise the amount of information fed to the classifiers, type 1 and type 2 audios were  
8 concatenated and used as a single input to the learning models.  
9  
10  
11  
12

13 All the audio recordings were first resampled to 8kHz and then converted to Mel-  
14 spectrograms using the Librosa library in Python. The hop-length was 2048 samples,  
15 and the number of Mel coefficients was set to 196. The Mel spectrograms were passed  
16 through VGG19 convolutional neural network architecture provided by Keras, which  
17 was pre-trained on the ImageNet database<sup>27</sup>. This approach, presented in Figure 2,  
18 may be considered as a feature extraction step, as it converts audio recordings to 512  
19 feature maps, each of a size 6x6, leading to a total of 18432 features.  
20  
21  
22  
23  
24  
25  
26

27 This large number of features is computationally expensive. Principal Component  
28 Analysis (PCA)<sup>28</sup> is therefore used for dimensionality reduction and to select the  
29 number of relevant components explaining the maximum of the variance in the data.  
30  
31  
32  
33  
34  
35  
36  
37  
38  
39  
40  
41  
42  
43  
44  
45  
46  
47  
48  
49  
50  
51  
52  
53  
54  
55  
56  
57  
58  
59  
60

## Statistical analysis

We divided our data into “Fatigue” and “No Fatigue” groups based on the participant’s reported answers for the inclusion and daily fatigue assessment of Predi-COVID. To characterize participants, descriptive statistics were used, which included means, standard deviations for quantitative variables, and counts and percentages for qualitative variables. The two population groups (3gp (Android users) and m4a (iOS users)) were compared using a student test for continuous variables, and a  $\chi^2$  test for categorical variables.

A 10-fold cross-validation procedure was conducted on the training cohort participants to evaluate four classification models (logistic regression (LR), k-nearest neighbors (KNN), support vector machine (SVM), and soft voting classifier (VC), scikit-learn implementation in Python) at different regularization levels via a grid search, with the following evaluation metrics: area under the ROC curve (AUC), accuracy, F1-score, precision, and recall. The Brier score was also used to evaluate the calibration of the selected models.

The predicted probability of being classified as fatigued from the best model was considered as our final vocal biomarker, which may be used as a quantitative metric to monitor fatigue.

We evaluated the vocal biomarker’s distribution in both classes (Fatigue and No Fatigue) and performed a t-test between the two groups.

## Results

### Study population characteristics

The final study population is composed of 296 participants of whom 165 were women (56%), with an average age of 40 years (SD = 13). To record both audio types, 109 (37%) participants utilized Android smartphones (3gp format), whereas 187 (63%) used iOS devices (m4a format). We found no difference in the distribution of age, gender, body mass index, smoking, antibiotic usage, and asthma, between the two types of devices ( $P$ -value > .05). The overall rate of comorbidities in this study was relatively low: there were 31 (10%) participants who used antibiotics and only 12 (4%) participants with asthma. More details are shown in Table 1.

**Table 1: Study population characteristics**

The clinical data in the table above describe the overall population of the study. The total number and its percentage are used to represent all categorical data. The table below summarizes general information for describing audio data.

All p-values comparing iOS (m4a) and Android users (3gp) were calculated using chi<sup>2</sup> and Student's t-tests.

|                                                                                                |                | All         | m4a         |             | 3gp         |             | P-values<br>(m4a, 3gp) |
|------------------------------------------------------------------------------------------------|----------------|-------------|-------------|-------------|-------------|-------------|------------------------|
|                                                                                                |                |             | Female      | Male        | Female      | Male        |                        |
| <b>Participants (N)</b>                                                                        | Total          | 296         | 107         | 80          | 51          | 58          | -                      |
| <b>Age (years)</b>                                                                             | mean (SD)      | 40.3 (12.6) | 38.8 (13.4) | 42.9 (12.7) | 37.8 (11.6) | 41.5 (11.3) | 0.28                   |
| <b>Body Mass Index (kg/m<sup>2</sup>)</b>                                                      | mean (SD)      | 24.1 (4.7)  | 24.6 (5.5)  | 26.5 (4.1)  | 24.1 (3.8)  | 26.6 (4.17) | 0.95                   |
| <b>Antibiotic (%)</b>                                                                          | No             | 265 (90%)   | 93 (87%)    | 73 (91%)    | 44 (86%)    | 55 (95%)    | 0.87                   |
|                                                                                                | Yes            | 31 (10%)    | 14 (13%)    | 7 (9%)      | 7 (14%)     | 3 (5%)      |                        |
| <b>Asthma (%)</b>                                                                              | No             | 284 (96%)   | 104 (97%)   | 75 (94%)    | 47 (92%)    | 58 (100%)   | 0.82                   |
|                                                                                                | Yes            | 12 (4%)     | 3 (3%)      | 5 (6%)      | 4 (8%)      | 0 (0%)      |                        |
| <b>Smoking (%)</b>                                                                             | Never          | 199 (67%)   | 77 (72%)    | 51 (64%)    | 36 (71%)    | 35 (60%)    | 0.41                   |
|                                                                                                | Former smoker  | 53 (18%)    | 19 (18%)    | 20 (25%)    | 9 (18%)     | 13 (22%)    |                        |
|                                                                                                | Current smoker | 44 (15%)    | 11 (10%)    | 9 (11%)     | 6 (11%)     | 10 (18%)    |                        |
| <b>Audio recordings</b>                                                                        | Total          | 1772        | 584         | 499         | 345         | 344         | <0.001                 |
|                                                                                                | No Fatigue     | 1222 (69%)  | 394 (67%)   | 370 (74%)   | 190 (55%)   | 268 (78%)   |                        |
|                                                                                                | Fatigue        | 550 (31%)   | 190 (33%)   | 129 (26%)   | 155 (45%)   | 76 (22%)    |                        |
| <b>Mean (SD) and maximum of audio recording per participant in the 14-day follow-up period</b> | mean (SD)      | 6 (5)       | 6 (5)       | 6 (5)       | 6 (5)       | 6 (5)       | -                      |
|                                                                                                | max            | 16          | 14          | 16          | 15          | 14          |                        |

1  
2  
3 Participants reported their fatigue status on average 6 days during the first 14 days of  
4 follow-up, resulting in the analysis of 1772 audio recordings for each audio type (type  
5 1 and type 2) when all inclusion criteria were met, including 550 audio recordings for  
6 participants with fatigue. In both audio sets, women reported experiencing fatigue at a  
7 higher rate than men ( $P$ -value<.001). Women constituted 155 (60%) of all fatigued  
8 Android users and 190 (67%) of all fatigued iOS users.  
9  
10  
11  
12  
13  
14

### 15 **Prediction models**

16 We reduced the extracted features from Mel-spectrograms to 250 top components  
17 with PCA, explaining 97% and 99% of the variance in the data for iOS and Android  
18 audio sets respectively. We then compared the performances of the machine learning  
19 algorithms to select the best models for the derivation of the vocal biomarkers.  
20  
21  
22  
23  
24

25 The voting classifier was the best model selected for the development of the vocal  
26 biomarker for male iOS users, with an AUC of 82% and overall accuracy, precision,  
27 recall, and f1-score of 84%. The model selected for female iOS users was SVM with  
28 an overall precision of 80% and an AUC of 86%. For male Android users, the selected  
29 model is the voting classifier with a precision and recall of 89%, a f1-score of 88%, and  
30 a weighted AUC of 85%. For female Android users, the SVM was selected with an  
31 overall precision of 79% and an AUC of 79%. More details are shown in Table 2. The  
32 calibrations of the selected models were good (Mean Brier Scores = 0.15, 0.12, 0.17,  
33 and 0.12 respectively for Android female users, Android male users, iOS female users,  
34 and iOS male users).  
35  
36  
37  
38  
39  
40  
41  
42  
43  
44

### 45 **Derivation of the digital fatigue vocal biomarker**

46 Based on the model selected for each audio set, we derived the trained vocal  
47 biomarkers which quantitatively represent the probability of being labeled as fatigued.  
48 As shown in Figure 3, we found a significant difference in the distributions of vocal  
49 biomarkers between the fatigue and no fatigue classes in our testing dataset (t-test  
50  $P$ <.001).  
51  
52  
53  
54  
55  
56  
57  
58  
59  
60

**Table 2: Results of the prediction models**

The selected models were selected using Recall<sub>1</sub> and weighted AUC and are highlighted in bold. Class 0: No fatigue, Class 1: Fatigue

| Audio_format  | Gender | ML model   | Accuracy    | Ov.Precision | Precision_0 | Precision_1 | Ov.Recall   | Recall_0    | Recall_1    | Ov.f1score  | f1-score_0  | f1-score_1  | Weighted AUC |
|---------------|--------|------------|-------------|--------------|-------------|-------------|-------------|-------------|-------------|-------------|-------------|-------------|--------------|
| 3gp (Android) | Female | LR         | 0.77        | 0.77         | 0.81        | 0.73        | 0.77        | 0.76        | 0.77        | 0.77        | 0.78        | 0.75        | 0.85         |
|               |        | KNN        | 0.72        | 0.73         | 0.70        | 0.77        | 0.72        | 0.87        | 0.55        | 0.72        | 0.78        | 0.64        | 0.76         |
|               |        | <b>SVM</b> | <b>0.80</b> | <b>0.80</b>  | <b>0.80</b> | <b>0.79</b> | <b>0.80</b> | <b>0.84</b> | <b>0.74</b> | <b>0.80</b> | <b>0.82</b> | <b>0.77</b> | <b>0.86</b>  |
|               |        | VC         | 0.78        | 0.78         | 0.81        | 0.75        | 0.78        | 0.79        | 0.77        | 0.78        | 0.80        | 0.76        | 0.86         |
|               | Male   | LR         | 0.78        | 0.79         | 0.87        | 0.50        | 0.78        | 0.85        | 0.53        | 0.79        | 0.86        | 0.52        | 0.81         |
|               |        | KNN        | 0.83        | 0.83         | 0.83        | 0.80        | 0.83        | 0.98        | 0.27        | 0.79        | 0.90        | 0.40        | 0.84         |
|               |        | SVM        | 0.84        | 0.83         | 0.88        | 0.67        | 0.84        | 0.93        | 0.53        | 0.83        | 0.90        | 0.59        | 0.82         |
|               |        | <b>VC</b>  | <b>0.84</b> | <b>0.84</b>  | <b>0.89</b> | <b>0.64</b> | <b>0.84</b> | <b>0.91</b> | <b>0.60</b> | <b>0.84</b> | <b>0.90</b> | <b>0.62</b> | <b>0.82</b>  |
| m4a (iOS)     | Female | LR         | 0.72        | 0.72         | 0.80        | 0.56        | 0.72        | 0.77        | 0.61        | 0.72        | 0.79        | 0.58        | 0.75         |
|               |        | KNN        | 0.68        | 0.65         | 0.72        | 0.50        | 0.68        | 0.86        | 0.29        | 0.65        | 0.78        | 0.37        | 0.67         |
|               |        | <b>SVM</b> | <b>0.79</b> | <b>0.79</b>  | <b>0.81</b> | <b>0.75</b> | <b>0.79</b> | <b>0.91</b> | <b>0.55</b> | <b>0.79</b> | <b>0.86</b> | <b>0.64</b> | <b>0.79</b>  |
|               |        | VC         | 0.77        | 0.76         | 0.80        | 0.69        | 0.77        | 0.89        | 0.53        | 0.76        | 0.84        | 0.60        | 0.78         |
|               | Male   | LR         | 0.73        | 0.74         | 0.83        | 0.48        | 0.73        | 0.80        | 0.54        | 0.73        | 0.81        | 0.51        | 0.80         |
|               |        | KNN        | 0.89        | 0.89         | 0.89        | 0.89        | 0.89        | 0.97        | 0.65        | 0.88        | 0.93        | 0.76        | 0.81         |
|               |        | SVM        | 0.85        | 0.84         | 0.86        | 0.76        | 0.85        | 0.95        | 0.58        | 0.84        | 0.90        | 0.67        | 0.85         |
|               |        | <b>VC</b>  | <b>0.89</b> | <b>0.89</b>  | <b>0.89</b> | <b>0.89</b> | <b>0.89</b> | <b>0.97</b> | <b>0.65</b> | <b>0.88</b> | <b>0.93</b> | <b>0.76</b> | <b>0.85</b>  |

KNN: K-Nearest Neighbors, LR: Logistic Regression, Ov. : Overall, SVM: Support Vector Machine, VC: Voting Classifier

## Discussion

In this study, we built an AI-based pipeline to develop a vocal biomarker for both genders and both types of smartphones (male/female, Android/iOS) that effectively recognize fatigued and non-fatigued participants with COVID-19.

We stratified the data to prevent data heterogeneity, which is considered contamination and makes it difficult to build a reliable and consistent classification model(s), resulting in poorer prediction performance. This contamination is caused by two factors: first, significant gender differences in fatigability, since it has previously been shown that men and women experience and report fatigue differently. And second, different microphone types incorporated in both smartphone devices used by the participants (iOS and Android), which have a direct impact on the quality of the recorded audios (machine learning algorithms separate the audio formats rather than the fatigue status if there is no constant microphone. (see Supplementary Online Material 2 for more details).

With the increased interest in remote voice analysis as a noninvasive and powerful telemedicine tool, various studies have been carried out, mostly in neurological disorders (eg, Parkinson's disease<sup>11</sup> and Alzheimer's disease<sup>29</sup>) and mental health (eg, stress and depression<sup>30</sup>). Recently, a significant research effort has evolved to employ respiratory sounds for COVID-19 and the main focus was on the use of cough<sup>17,31</sup> and breathing<sup>32</sup> to develop a COVID-19 screening tool. However, no previous work has been devoted to investigating the association of voice with COVID-19 symptoms, precisely fatigue.

Fatigue is one of the commonly reported symptoms of COVID-19 and Long-COVID syndrome<sup>33</sup>, which can persist regardless of how severe COVID-19's acute stage is<sup>34</sup>. A variety of cerebral, peripheral, and psychosocial factors<sup>35,7</sup> play a role in the development of fatigue. It may also occur from chronic inflammation in the brain and at neuromuscular junctions. New evidence shows that patients with Long-COVID syndrome continue to have higher measures of blood clotting, thrombosis<sup>36</sup>, which may also explain the persistence of fatigue. COVID-19 is associated with variations in airway resistance<sup>37</sup>. This narrowing of the airway is manifested in the increase in



audible turbulence in both sighing and yawning, which is frequently associated with fatigue<sup>38</sup>.

Human voice is produced by the flow of air from the lungs through the larynx, which causes the vocal fold vibrations, generating a pulsating air stream<sup>39</sup>. The process is controlled by the laryngeal muscle activation<sup>40</sup> but involves the entire respiratory system to provide the air pressure necessary for phonation. Decreased pulmonary function in COVID-19 patients can cause reduced glottal airflow that is essential for normal voice production<sup>41</sup>. Furthermore, in case of increased fatigue, the voice production process may be additionally disturbed due to reduced laryngeal muscle tension, resulting in dysphonia that appears in up to 49% of COVID-19 patients<sup>41</sup>.

### Study Limitations

This study has several limitations. First, although our data was stratified based on gender and smartphone devices, the mix of languages might also result in different voice features subsequently, in different model performances. There is presently no comparable dataset with similar audio recordings for further external validation of our findings. Thus, more data should be collected to improve the transferability of our vocal biomarker to other populations. Second, our data labeling was only based on a qualitative self-reported fatigue status. A fatigue severity scale would allow a quantitative assessment of fatigue severity in a uniform and unbiased way throughout all participants. Finally, time series voice analysis for each participant was not included in the study. More investigation, including time series analysis, would establish a personalized baseline for each participant, potentially enhancing the performance of our vocal biomarkers.

### Conclusion

In this study, we demonstrated the association between fatigue and voice in people with COVID-19 and developed a fatigue vocal biomarker that can accurately predict the presence of fatigue. These findings suggest that vocal biomarkers, digitally incorporated into telemonitoring technologies, might be used to identify and remotely monitor this symptom in patients suffering from COVID-19 as well as other chronic diseases.

## Acknowledgments

We thank all participants that accepted to be involved in the study, members that collaborated to the launch and monitoring of the Predi-COVID cohort, as well as its scientific committee, the IT team responsible for the development of the application, and the nurses in charge of recruitment, data collection, and management on the field.

## Contributors

Elbéji and Fagherazzi had full access to all of the data in the study and took responsibility for the integrity of the data and the accuracy of the data analysis.

**Concept and design:** Fagherazzi, Zhang, Fischer.

**Acquisition, analysis, or interpretation of data:** All authors.

**Drafting of the manuscript:** Elbéji.

**Critical revision of the manuscript for important intellectual content:** All authors.

**Statistical analysis:** Elbéji, Zhang, Higa, Fischer.

**Obtained funding:** Fagherazzi.

**Administrative, technical, or material support:** Fischer.

## Funding and Conflict of Interests Statement

The Predi-COVID study is supported by the Luxembourg National Research Fund (FNR) (Predi-COVID, grant number 14716273), the André Losch Foundation, and the Luxembourg Institute of Health.

**Competing interests:** None declared.

### Data Sharing Statement

Audio data, datasets and source code used in this study are publicly available.

Audio data available in Zenodo repository, [DOI: 10.5281/zenodo.5937844]

Datasets and source code available in Github, [https://github.com/LIHVOICE/Predi\_COVID\_Fatigue\_Vocal\_Biomarker].

### Ethics Statement

The National Research Ethics Committee of Luxembourg (study number 202003/07) gave a favorable opinion to the study in April 2020.

### References

- 1 WHO Coronavirus (COVID-19) Dashboard. <https://covid19.who.int> (accessed Aug 5, 2021).
- 2 Website. <https://www.oecd.org/coronavirus/policy-responses/the-territorial-impact-of-covid-19-managing-the-crisis-and-recovery-across-levels-of-government-a2c6abaf/>.
- 3 Qi R, Chen W, Liu S, *et al*. Psychological morbidities and fatigue in patients with confirmed COVID-19 during disease outbreak: prevalence and associated biopsychosocial risk factors. *medRxiv* 2020; : 2020.05.08.20031666.
- 4 Tansey CM, Louie M, Loeb M, *et al*. One-year outcomes and health care utilization in survivors of severe acute respiratory syndrome. *Arch Intern Med* 2007; **167**: 1312–20.
- 5 Neuropsychological and neurophysiological correlates of fatigue in post-acute patients with neurological manifestations of COVID-19: Insights into a challenging symptom. *J Neurol Sci* 2021; **420**: 117271.
- 6 Rudroff T, Fietsam AC, Deters JR, Bryant AD, Kamholz J. Post-COVID-19 Fatigue: Potential Contributing Factors. *Brain Sciences* 2020; **10**: 1012.
- 7 Morgul E, Bener A, Atak M, *et al*. COVID-19 pandemic and psychological fatigue in Turkey. *International Journal of Social Psychiatry*. 2021; **67**: 128–35.

- 1  
2  
3 8 Hunter SK. Sex differences in human fatigability: mechanisms and insight to  
4 physiological responses. *Acta Physiol* 2014; **210**: 768–89.  
5  
6  
7  
8 9 Gunasekeran DV, Tseng RMW, Tham Y-C, Wong TY. Applications of digital  
9 health for public health responses to COVID-19: a systematic scoping review of  
10 artificial intelligence, telehealth and related technologies. *NPJ Digital Medicine*  
11 2021; **4**. DOI:10.1038/s41746-021-00412-9.  
12  
13  
14  
15 10 DeMerle K, Angus DC, Seymour CW. Precision Medicine for COVID-19:  
16 Phenotype Anarchy or Promise Realized? *JAMA* 2021; **325**: 2041–2.  
17  
18  
19  
20 11 Tracy JM, Özkanca Y, Atkins DC, Hosseini GR. Investigating voice as a  
21 biomarker: Deep phenotyping methods for early detection of Parkinson’s disease.  
22 *J Biomed Inform* 2020; **104**. DOI:10.1016/j.jbi.2019.103362.  
23  
24  
25  
26 12 Laguarta J, Subirana B. Longitudinal Speech Biomarkers for Automated  
27 Alzheimer’s Detection. *Frontiers in Computer Science*. 2021; **3**.  
28 DOI:10.3389/fcomp.2021.624694.  
29  
30  
31  
32 13 Cho S-W, Yin CS, Park Y-B, Park Y-J. Differences in self-rated, perceived, and  
33 acoustic voice qualities between high- and low-fatigue groups. *J Voice* 2011; **25**:  
34 544–52.  
35  
36  
37  
38 14 Whitmore J, Fisher S. Speech during sustained operations. *Speech*  
39 *Communication*. 1996; **20**: 55–70.  
40  
41  
42  
43 15 Vollrath M. Automatic measurement of aspects of speech reflecting motor  
44 coordination. *Behavior Research Methods, Instruments, & Computers*. 1994; **26**:  
45 35–40.  
46  
47  
48  
49 16 Greeley HP, Berg J, Friets E, *et al*. Fatigue estimation using voice analysis.  
50 *Behavior Research Methods*. 2007; **39**: 610–9.  
51  
52  
53  
54 17 Detection of COVID-19 from voice, cough and breathing patterns: Dataset and  
55 preliminary results. *Comput Biol Med* 2021; **138**: 104944.  
56  
57  
58  
59 18 Orlandic L, Teijeiro T, Atienza D. The COUGHVID crowdsourcing dataset, a  
60 corpus for the study of large-scale cough analysis algorithms. *Scientific Data*.

- 2021; **8**. DOI:10.1038/s41597-021-00937-4.
- 19 Bartl-Pokorny KD, Pokorny FB, Batliner A, *et al*. The voice of COVID-19: Acoustic correlates of infection in sustained vowels. *J Acoust Soc Am* 2021; **149**: 4377.
- 20 Fagherazzi G, Fischer A, Betsou F, *et al*. Protocol for a prospective, longitudinal cohort of people with COVID-19 and their household members to study factors associated with disease severity: the Predi-COVID study. *BMJ Open* 2020; **10**: e041834.
- 21 United Nations. Universal Declaration of Human Rights | United Nations. <https://www.un.org/en/about-us/universal-declaration-of-human-rights> (accessed Nov 18, 2021).
- 22 Hoffmann W, Latza U, Baumeister SE, *et al*. Guidelines and recommendations for ensuring Good Epidemiological Practice (GEP): a guideline developed by the German Society for Epidemiology. *Eur J Epidemiol* 2019; **34**: 301–17.
- 23 [datasets]  
LIHVOICE.Predi\_COVID\_Fatigue\_Vocal\_Biomarker/Android\_audioset.csv at main · LIHVOICE/Predi\_COVID\_Fatigue\_Vocal\_Biomarker. GitHub. [https://github.com/LIHVOICE/Predi\\_COVID\\_Fatigue\\_Vocal\\_Biomarker](https://github.com/LIHVOICE/Predi_COVID_Fatigue_Vocal_Biomarker) (accessed Jan 31, 2022).
- 24 [datasets] Elbéji A, Zhang L, Higa E, *et al*. Audio recordings of COVID-19 positive individuals from the prospective Predi-COVID cohort study with their fatigue status. 2022; published online Feb 1. DOI:10.5281/zenodo.5937844.
- 25 Barman R, Deshpande S, Agarwal S, Inamdar U, Devare M. Transfer Learning for Small Dataset. 2019; published online March 26. <http://dx.doi.org/> (accessed Nov 18, 2021).
- 26 Weiss K, Khoshgoftaar TM, Wang D. A survey of transfer learning. *Journal of Big Data* 2016; **3**: 1–40.
- 27 Simonyan K, Zisserman A. Very Deep Convolutional Networks for Large-Scale Image Recognition. 2014; published online Sept 4. <http://arxiv.org/abs/1409.1556>

(accessed Aug 6, 2021).

- 28 Hasan BMS, Abdulazeez AM. A Review of Principal Component Analysis Algorithm for Dimensionality Reduction. *Journal of Soft Computing and Data Mining* 2021; **2**: 20–30.
- 29 König A, Satt A, Sorin A, *et al.* Automatic speech analysis for the assessment of patients with predementia and Alzheimer’s disease. *Alzheimer’s & dementia (Amsterdam, Netherlands)* 2015; **1**. DOI:10.1016/j.dadm.2014.11.012.
- 30 Zhang L, Duvvuri R, Chandra KKL, Nguyen T, Ghomi RH. Automated voice biomarkers for depression symptoms using an online cross-sectional data collection initiative. *Depress Anxiety* 2020; **37**. DOI:10.1002/da.23020.
- 31 Noninvasive Vocal Biomarker is Associated With Severe Acute Respiratory Syndrome Coronavirus 2 Infection. *Mayo Clinic Proceedings: Innovations, Quality & Outcomes* 2021; **5**: 654–62.
- 32 COVID-19 Sounds App. <http://www.covid-19-sounds.org/> (accessed Nov 18, 2021).
- 33 Goërtz YMJ, Van Herck M, Delbressine JM, *et al.* Persistent symptoms 3 months after a SARS-CoV-2 infection: the post-COVID-19 syndrome? *ERJ Open Res* 2020; **6**. DOI:10.1183/23120541.00542-2020.
- 34 Townsend L, Dyer AH, Jones K, *et al.* Persistent fatigue following SARS-CoV-2 infection is common and independent of severity of initial infection. *PLoS One* 2020; **15**: e0240784.
- 35 Arnold P, Njemini R, Vantieghem S, *et al.* Peripheral muscle fatigue in hospitalised geriatric patients is associated with circulating markers of inflammation. *Experimental Gerontology*. 2017; **95**: 128–35.
- 36 Fogarty H, Townsend L, Morrin H, *et al.* Persistent endotheliopathy in the pathogenesis of long COVID syndrome. *J Thromb Haemost* 2021; **19**. DOI:10.1111/jth.15490.
- 37 Pan S-Y, Ding M, Huang J, Cai Y, Huang Y-Z. Airway resistance variation

1  
2  
3 correlates with prognosis of critically ill COVID-19 patients: A computational fluid  
4 dynamics study. *Comput Methods Programs Biomed* 2021; **208**: 106257.

- 5  
6  
7  
8 38 Murry T. *The voice and its disorders*, 4th edition. By Margaret C. L. Greene, 446  
9 pp, illus, J. B. Lippincott Co., Philadelphia, PA, 1980. \$47.50. 1981.  
10 DOI:10.1002/HED.2890030517.  
11  
12  
13  
14 39 Zörner S, Kaltenbacher M, Döllinger M. Investigation of prescribed movement in  
15 fluid–structure interaction simulation for the human phonation process.  
16 *Computers & Fluids*. 2013; **86**: 133–40.  
17  
18  
19  
20 40 Yin J, Zhang Z. Laryngeal muscular control of vocal fold posturing: Numerical  
21 modeling and experimental validation. *J Acoust Soc Am* 2016; **140**: EL280.  
22  
23  
24  
25 41 Dassie-Leite AP, Gueths TP, Ribeiro VV, Pereira EC, Martins P do N, Daniel CR.  
26 Vocal Signs and Symptoms Related to COVID-19 and Risk Factors for their  
27 Persistence. *J Voice* 2021; published online Aug 11.  
28 DOI:10.1016/j.jvoice.2021.07.013.  
29  
30  
31

## 32 **Legends**

33  
34  
35 **Table 1:** Study population characteristics

36 **Table 2:** Results of the prediction models

37 **Figure 1.** General Pipeline

38 **Figure 2.** VGG19 Feature Extraction

39 **Figure 3.** Derivation of the digital fatigue vocal biomarker for Android and iOS users.

40 **SOM 1.** Text to read

41 **SOM 2.** VGG19 extracted features from participants' audio recordings  
42  
43  
44  
45  
46  
47  
48  
49  
50  
51  
52  
53  
54  
55  
56  
57  
58  
59  
60

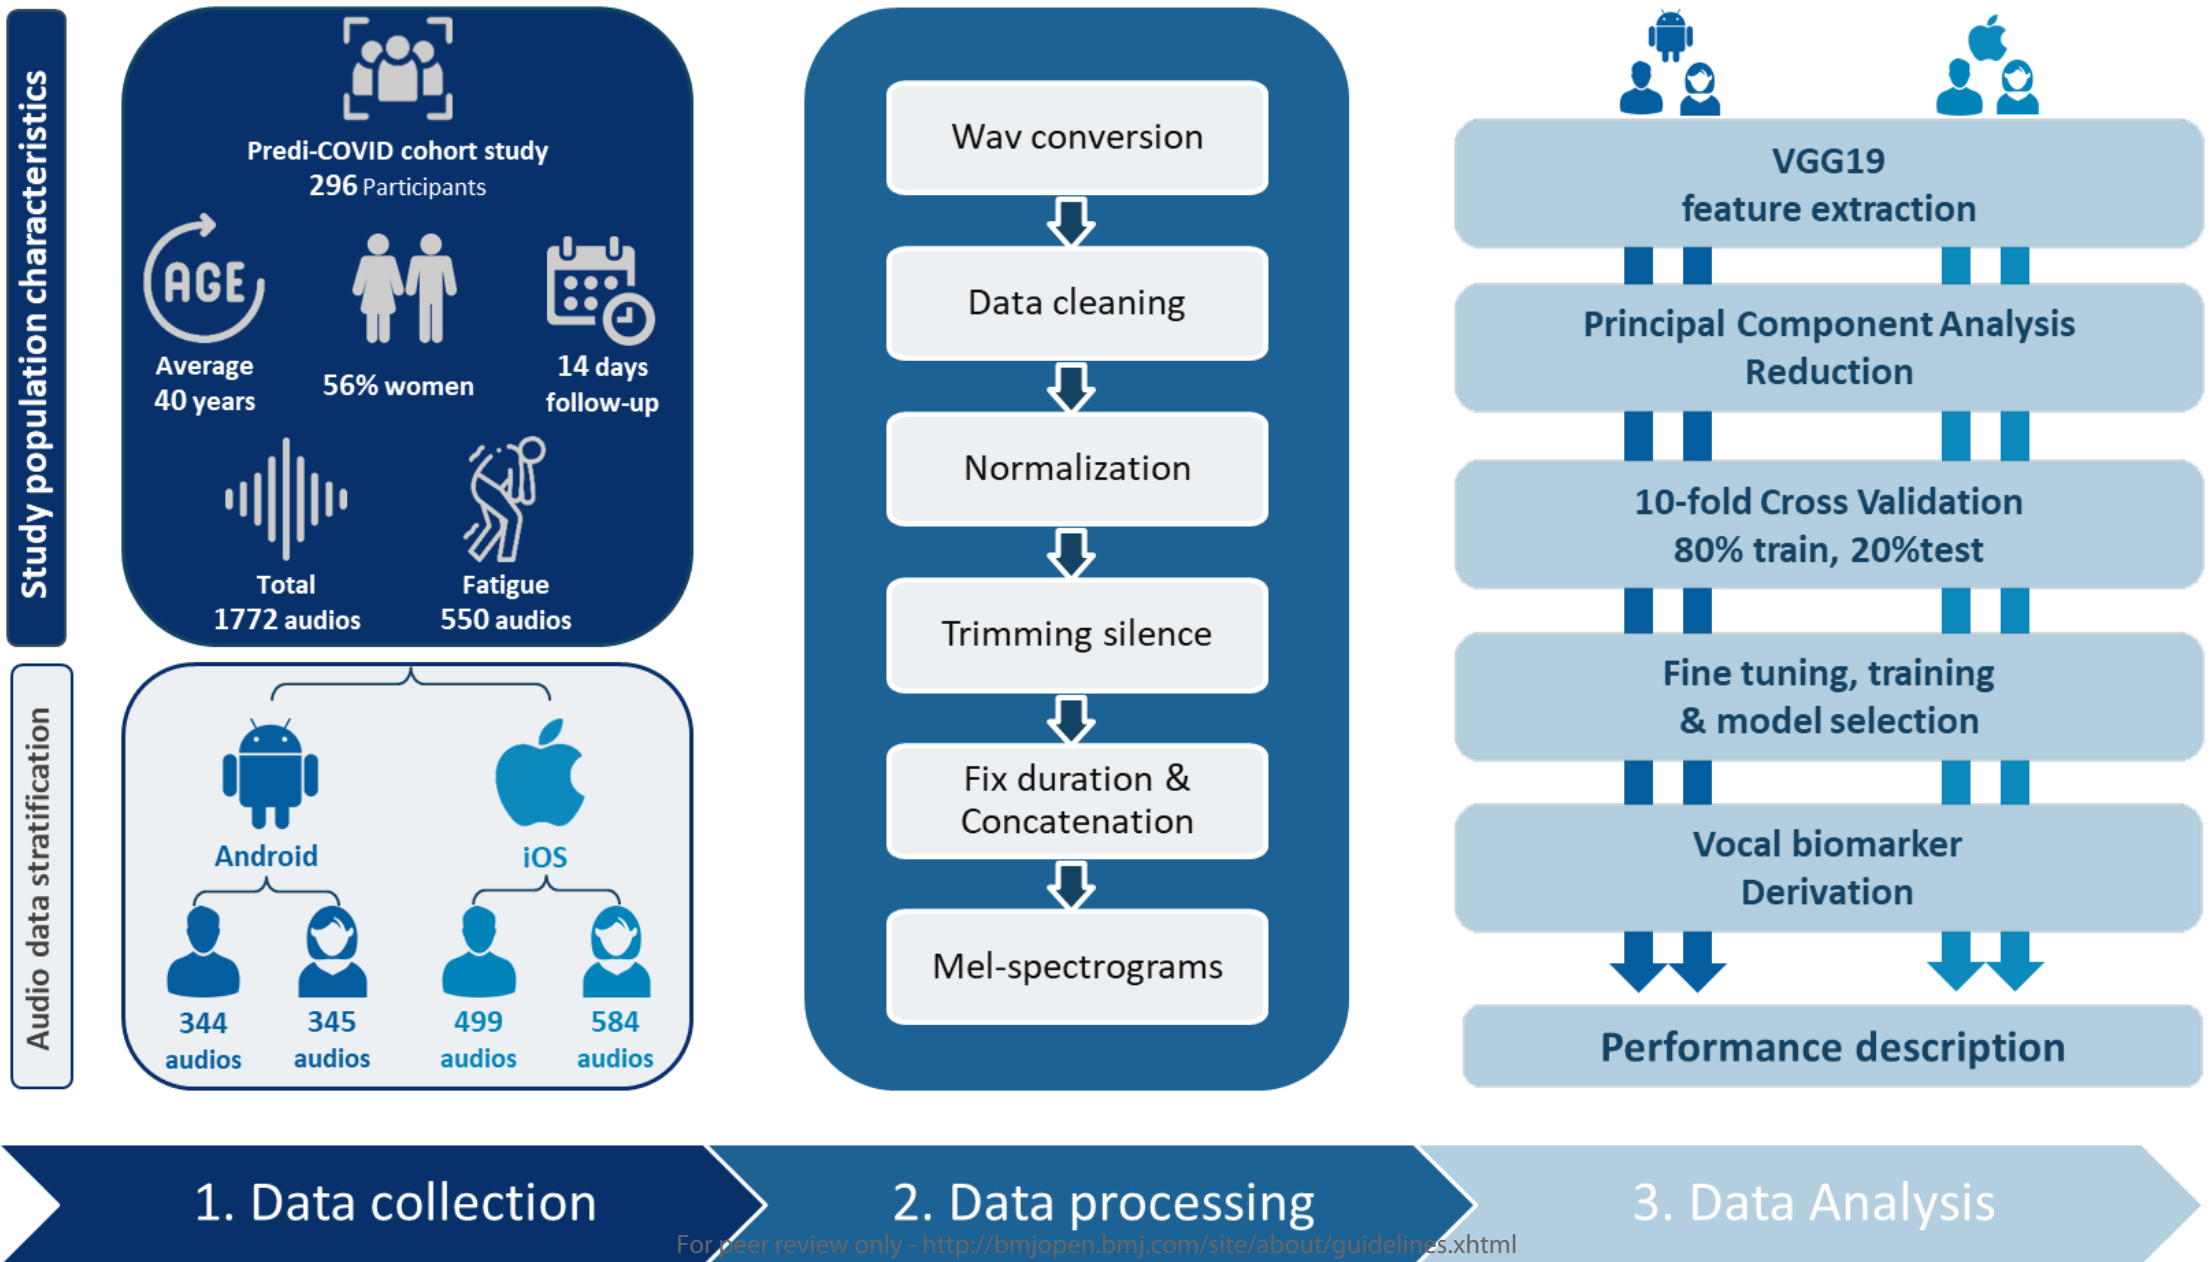



1  
2  
3  
4  
5  
6  
7  
8  
9  
10  
11  
12  
13  
14  
15  
16  
17  
18  
19  
20  
21  
22  
23  
24  
25  
26  
27  
28  
29  
30  
31  
32  
33  
34  
35  
36  
37  
38  
39  
40  
41

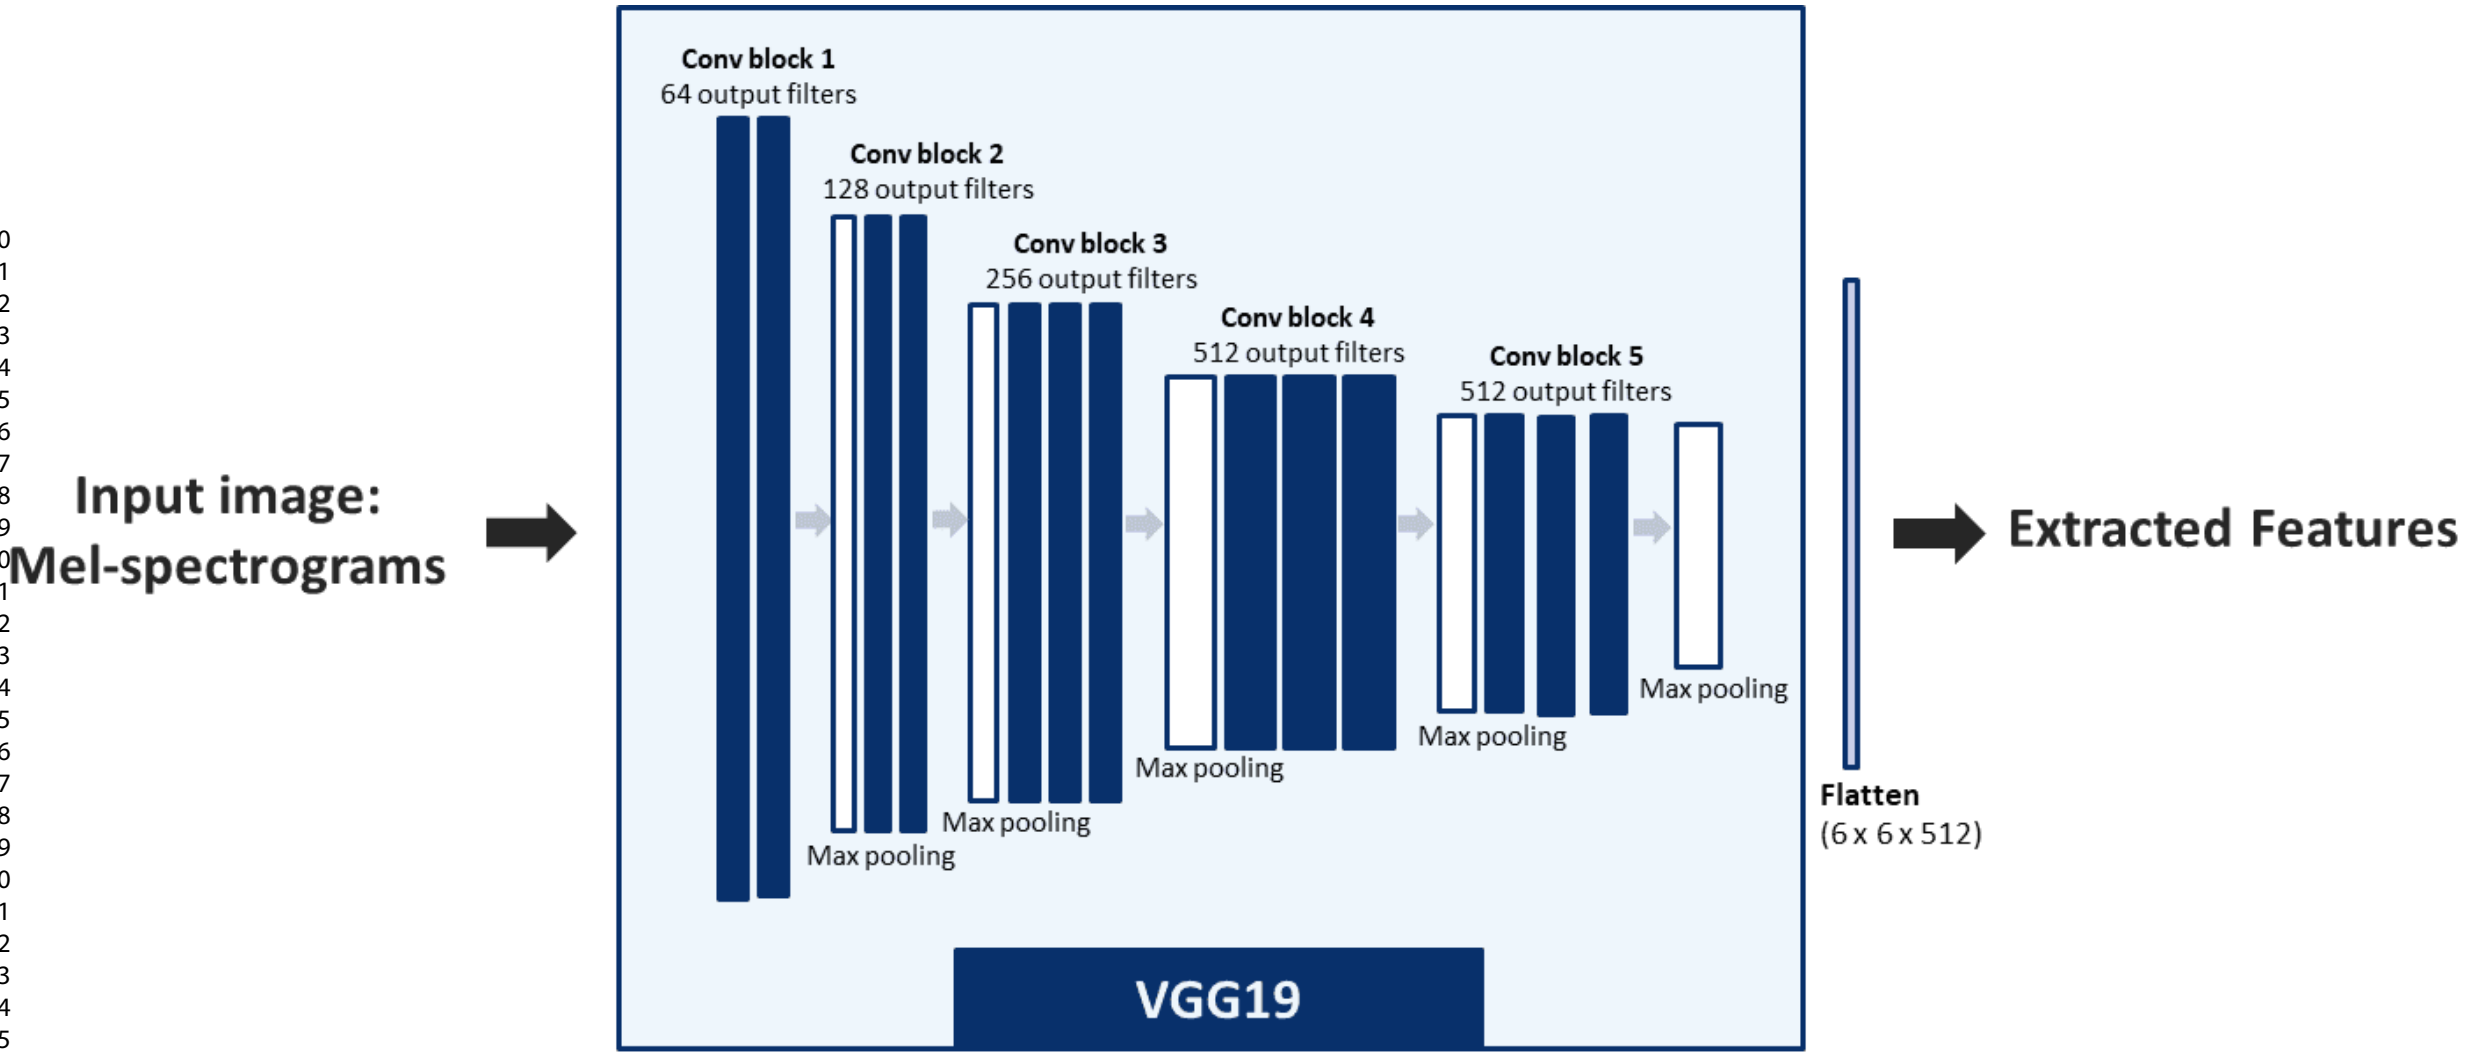

Men

Women

Men

Women

A.

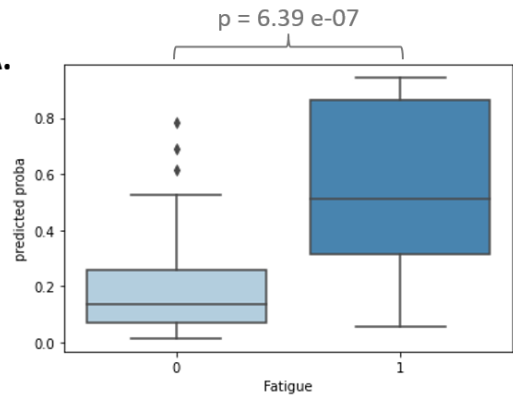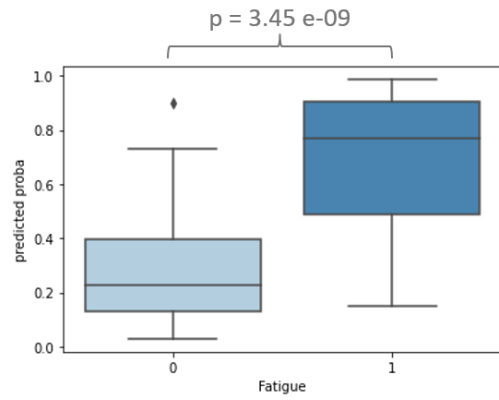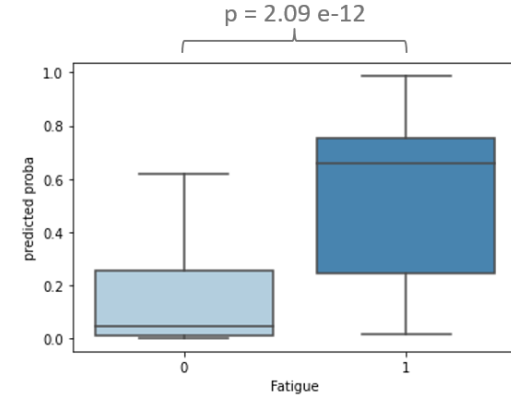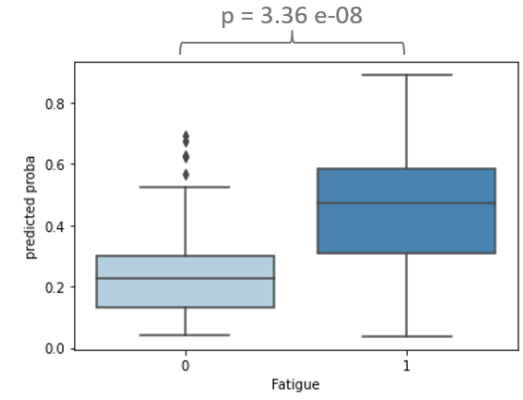

B.

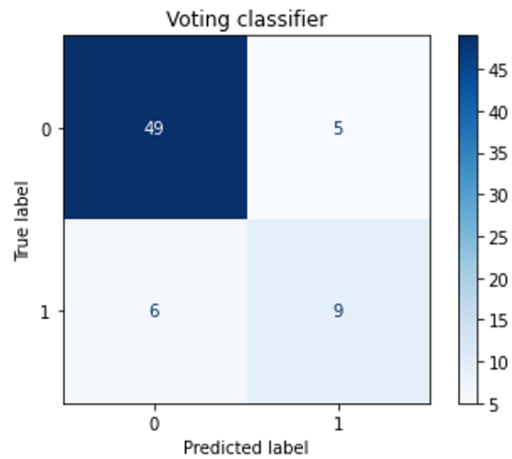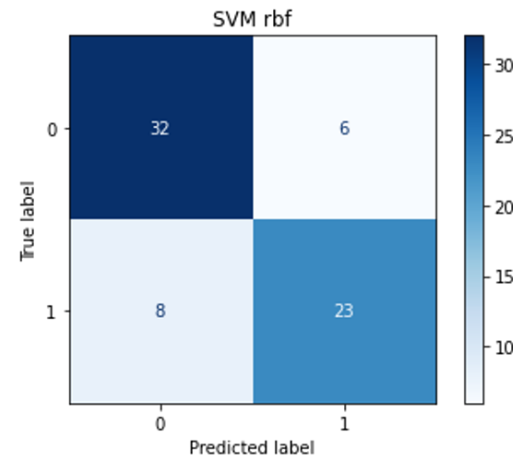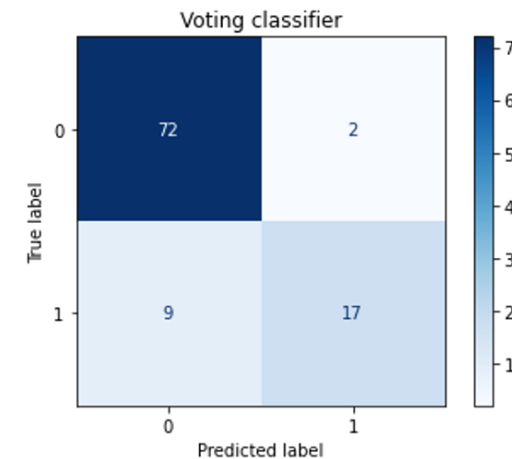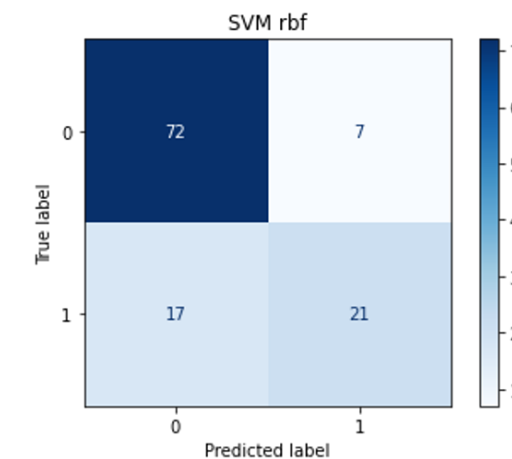

C.

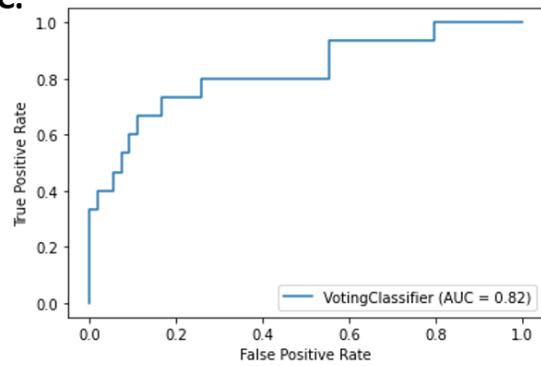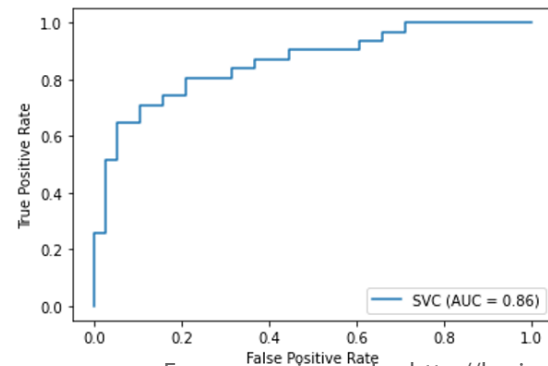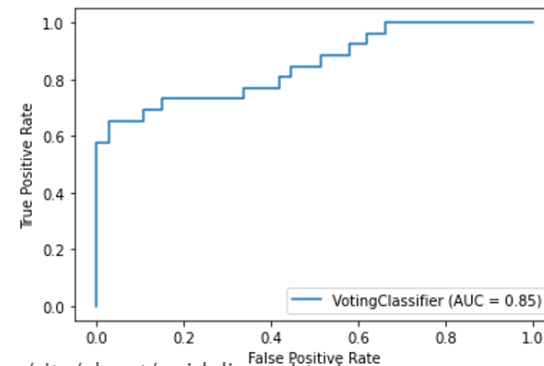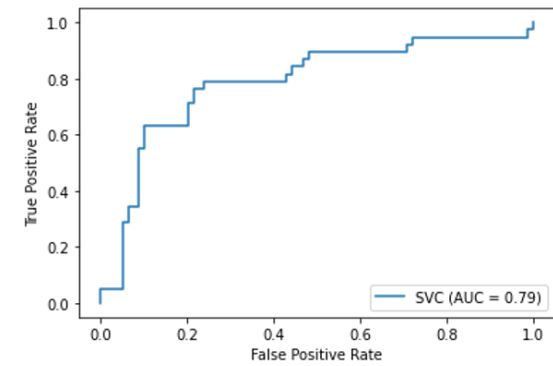

For peer review only - <http://bmjopen.bmj.com/site/about/guidelines.xhtml>

Figure 3a. Derivation of the digital fatigue vocal biomarker for Android users

Figure 3b. Derivation of the digital fatigue vocal biomarker for iOS users

1  
2  
3 **Supplementary Online Material 1. Standardized, prespecified text to be read by**  
4 **study participants to collect voice recordings.**  
5  
6  
7  
8  
9

10 Universal Declaration of Human Rights, United Nations.  
11  
12  
13

14 **English**  
15  
16  
17  
18

19 Everyone has the right to a standard of living adequate for the health and well-being  
20 of himself and of his family, including food, clothing, housing and medical care and  
21 necessary social services, and the right to security in the event of unemployment,  
22 sickness, disability, widowhood, old age or other lack of livelihood in circumstances  
23 beyond his control.  
24  
25  
26  
27  
28  
29  
30  
31

32 **French**  
33  
34  
35

36 Toute personne a droit à un niveau de vie suffisant pour assurer sa santé, son bien-  
37 être et ceux de sa famille, notamment pour l'alimentation, l'habillement, le logement,  
38 les soins médicaux ainsi que pour les services sociaux nécessaires ; elle a droit à la  
39 sécurité en cas de chômage, de maladie, d'invalidité, de veuvage, de vieillesse ou  
40 dans les autres cas de perte de ses moyens de subsistance par suite de  
41 circonstances indépendantes de sa volonté.  
42  
43  
44  
45  
46  
47  
48  
49  
50  
51

52 **German**  
53  
54  
55

56 Jeder hat das Recht auf einen Lebensstandard, der seine und seiner Familie  
57 Gesundheit und Wohl gewährleistet, einschließlich Nahrung, Kleidung, Wohnung,  
58  
59  
60

1  
2  
3 ärztliche Versorgung und notwendige soziale Leistungen gewährleistet sowie das  
4  
5 Recht auf Sicherheit im Falle von Arbeitslosigkeit, Krankheit, Invalidität oder  
6  
7 Verwitkung, im Alter sowie bei anderweitigem Verlust seiner Unterhaltsmittel durch  
8  
9 unverschuldete Umstände.  
10  
11  
12

### 13 **Portuguese**

14  
15  
16  
17  
18 Toda a pessoa tem direito a um nível de vida suficiente para lhe assegurar e à sua  
19  
20 família a saúde e o bem-estar, principalmente quanto à alimentação, ao vestuário,  
21  
22 ao alojamento, à assistência médica e ainda quanto aos serviços sociais  
23  
24 necessários, e tem direito à segurança no desemprego, na doença, na invalidez, na  
25  
26 viuvez, na velhice ou noutros casos de perda de meios de subsistência por  
27  
28 circunstâncias independentes da sua vontade.  
29  
30  
31  
32  
33  
34  
35  
36  
37  
38  
39  
40  
41  
42  
43  
44  
45  
46  
47  
48  
49  
50  
51  
52  
53  
54  
55  
56  
57  
58  
59  
60

## Supplementary Online Material 2. VGG19 extracted features from participants' audio recordings

VGG19 extracted features from male participants' audio recordings

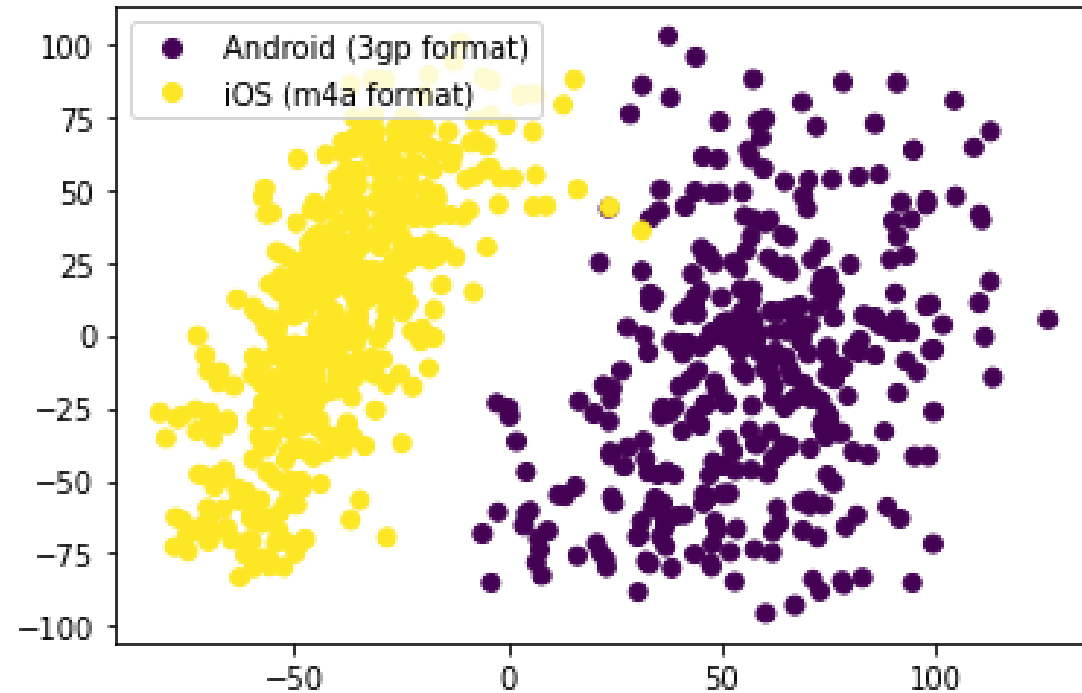

VGG19 extracted features from female participants' audio recordings

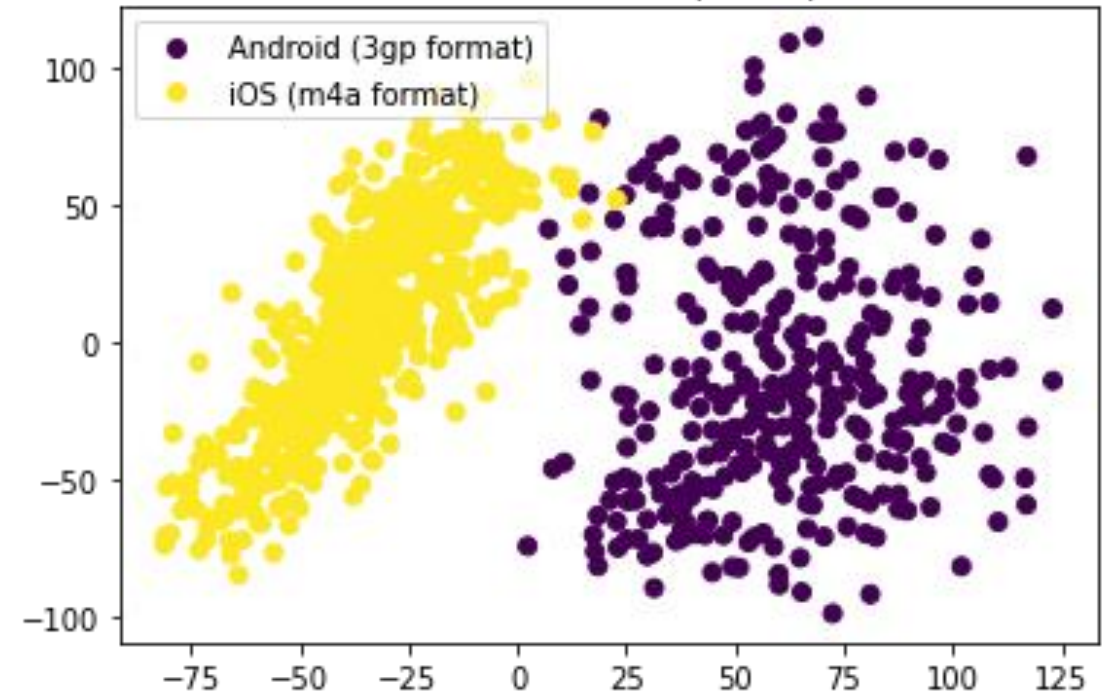

The scatter plot of the 250 relevant components given by PCA reduction revealed two distinct clusters. These two groups appeared to characterize the audio formats, m4a (iOS users) and 3gp (Android users).

It was consequently hypothesized that our data was heterogeneous and that it would be preferable to fit the models with each audio format independently.

For peer review only - <http://bmjopen.bmj.com/site/about/guidelines.xhtml>

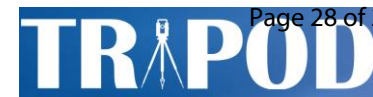

TRIPOD Checklist: Prediction Model Development and Validation

| Section/Topic                | Item | Checklist Item                                                                                                                                                                                            | Page   |
|------------------------------|------|-----------------------------------------------------------------------------------------------------------------------------------------------------------------------------------------------------------|--------|
| <b>Title and abstract</b>    |      |                                                                                                                                                                                                           |        |
| Title                        | 1    | D;V Identify the study as developing and/or validating a multivariable prediction model, the target population, and the outcome to be predicted.                                                          | 1      |
| Abstract                     | 2    | D;V Provide a summary of objectives, study design, setting, participants, sample size, predictors, outcome, statistical analysis, results, and conclusions.                                               | 2      |
| <b>Introduction</b>          |      |                                                                                                                                                                                                           |        |
| Background and objectives    | 3a   | D;V Explain the medical context (including whether diagnostic or prognostic) and rationale for developing or validating the multivariable prediction model, including references to existing models.      | 4      |
|                              | 3b   | D;V Specify the objectives, including whether the study describes the development or validation of the model or both.                                                                                     | 5      |
| <b>Methods</b>               |      |                                                                                                                                                                                                           |        |
| Source of data               | 4a   | D;V Describe the study design or source of data (e.g., randomized trial, cohort, or registry data), separately for the development and validation data sets, if applicable.                               | 5      |
|                              | 4b   | D;V Specify the key study dates, including start of accrual; end of accrual; and, if applicable, end of follow-up.                                                                                        |        |
| Participants                 | 5a   | D;V Specify key elements of the study setting (e.g., primary care, secondary care, general population) including number and location of centres.                                                          | 6      |
|                              | 5b   | D;V Describe eligibility criteria for participants.                                                                                                                                                       |        |
|                              | 5c   | D;V Give details of treatments received, if relevant.                                                                                                                                                     |        |
| Outcome                      | 6a   | D;V Clearly define the outcome that is predicted by the prediction model, including how and when assessed.                                                                                                | 9      |
|                              | 6b   | D;V Report any actions to blind assessment of the outcome to be predicted.                                                                                                                                |        |
| Predictors                   | 7a   | D;V Clearly define all predictors used in developing or validating the multivariable prediction model, including how and when they were measured.                                                         | 8      |
|                              | 7b   | D;V Report any actions to blind assessment of predictors for the outcome and other predictors.                                                                                                            |        |
| Sample size                  | 8    | D;V Explain how the study size was arrived at.                                                                                                                                                            | 7      |
| Missing data                 | 9    | D;V Describe how missing data were handled (e.g., complete-case analysis, single imputation, multiple imputation) with details of any imputation method.                                                  |        |
| Statistical analysis methods | 10a  | D Describe how predictors were handled in the analyses.                                                                                                                                                   | 8      |
|                              | 10b  | D Specify type of model, all model-building procedures (including any predictor selection), and method for internal validation.                                                                           |        |
|                              | 10c  | V For validation, describe how the predictions were calculated.                                                                                                                                           |        |
|                              | 10d  | D;V Specify all measures used to assess model performance and, if relevant, to compare multiple models.                                                                                                   |        |
|                              | 10e  | V Describe any model updating (e.g., recalibration) arising from the validation, if done.                                                                                                                 |        |
| Risk groups                  | 11   | D;V Provide details on how risk groups were created, if done.                                                                                                                                             |        |
| Development vs. validation   | 12   | V For validation, identify any differences from the development data in setting, eligibility criteria, outcome, and predictors.                                                                           | 9      |
| <b>Results</b>               |      |                                                                                                                                                                                                           |        |
| Participants                 | 13a  | D;V Describe the flow of participants through the study, including the number of participants with and without the outcome and, if applicable, a summary of the follow-up time. A diagram may be helpful. | 9      |
|                              | 13b  | D;V Describe the characteristics of the participants (basic demographics, clinical features, available predictors), including the number of participants with missing data for predictors and outcome.    |        |
|                              | 13c  | V For validation, show a comparison with the development data of the distribution of important variables (demographics, predictors and outcome).                                                          |        |
| Model development            | 14a  | D Specify the number of participants and outcome events in each analysis.                                                                                                                                 | 9      |
|                              | 14b  | D If done, report the unadjusted association between each candidate predictor and outcome.                                                                                                                |        |
| Model specification          | 15a  | D Present the full prediction model to allow predictions for individuals (i.e., all regression coefficients, and model intercept or baseline survival at a given time point).                             | 10     |
|                              | 15b  | D Explain how to use the prediction model.                                                                                                                                                                |        |
| Model performance            | 16   | D;V Report performance measures for the prediction model.                                                                                                                                                 | 10     |
| Model-updating               | 17   | V If done, report the results from any model updating (i.e., model specification, model performance).                                                                                                     |        |
| <b>Discussion</b>            |      |                                                                                                                                                                                                           |        |
| Limitations                  | 18   | D;V Discuss any limitations of the study (such as nonrepresentative sample, few events per predictor, missing data).                                                                                      | 11     |
| Interpretation               | 19a  | V For validation, discuss the results with reference to performance in the development data, and any other validation data.                                                                               | 10     |
|                              | 19b  | D;V Give an overall interpretation of the results, considering objectives, limitations, results from similar studies, and other relevant evidence.                                                        |        |
| Implications                 | 20   | D;V Discuss the potential clinical use of the model and implications for future research.                                                                                                                 | 12     |
| <b>Other information</b>     |      |                                                                                                                                                                                                           |        |
| Supplementary information    | 21   | D;V Provide information about the availability of supplementary resources, such as study protocol, Web calculator, and data sets.                                                                         | 5,6,10 |
| Funding                      | 22   | D;V Give the source of funding and the role of the funders for the present study.                                                                                                                         | 3      |

\*Items relevant only to the development of a prediction model are denoted by D, items relating solely to a validation of a prediction model are denoted by V, and items relating to both are denoted D;V. We recommend using the TRIPOD Checklist in conjunction with the TRIPOD Explanation and Elaboration document.

# BMJ Open

## Vocal biomarker predicts fatigue in people with COVID-19: results from the prospective Predi-COVID cohort study

|                                 |                                                                                                                                                                                                                                                                                                                                                                                                                                                                                                                                                                                                                                                                                    |
|---------------------------------|------------------------------------------------------------------------------------------------------------------------------------------------------------------------------------------------------------------------------------------------------------------------------------------------------------------------------------------------------------------------------------------------------------------------------------------------------------------------------------------------------------------------------------------------------------------------------------------------------------------------------------------------------------------------------------|
| Journal:                        | <i>BMJ Open</i>                                                                                                                                                                                                                                                                                                                                                                                                                                                                                                                                                                                                                                                                    |
| Manuscript ID                   | bmjopen-2022-062463.R1                                                                                                                                                                                                                                                                                                                                                                                                                                                                                                                                                                                                                                                             |
| Article Type:                   | Original research                                                                                                                                                                                                                                                                                                                                                                                                                                                                                                                                                                                                                                                                  |
| Date Submitted by the Author:   | 22-Jul-2022                                                                                                                                                                                                                                                                                                                                                                                                                                                                                                                                                                                                                                                                        |
| Complete List of Authors:       | Elbéji, Abir; Luxembourg Institute of Health, Department of Precision Health<br>Zhang, Lu; Luxembourg Institute of Health, Department of Precision Health<br>Higa, Eduardo; Luxembourg Institute of Health, Department of Precision Health<br>Fischer, Aurélie; Luxembourg Institute of Health, Departement of Population Health<br>Despotovic, Vladimir; Luxembourg Institute of Health, Department of Precision Health<br>Nazarov, Petr V.; Luxembourg Institute of Health, Department of Precision Health<br>Aguayo, Gloria; Luxembourg Institute of Health, Department of Population Health<br>Fagherazzi, Guy; Luxembourg Institute of Health, Department of Precision Health |
| <b>Primary Subject Heading</b>: | Health informatics                                                                                                                                                                                                                                                                                                                                                                                                                                                                                                                                                                                                                                                                 |
| Secondary Subject Heading:      | Global health                                                                                                                                                                                                                                                                                                                                                                                                                                                                                                                                                                                                                                                                      |
| Keywords:                       | COVID-19, Health informatics < BIOTECHNOLOGY & BIOINFORMATICS, Public health < INFECTIOUS DISEASES                                                                                                                                                                                                                                                                                                                                                                                                                                                                                                                                                                                 |
|                                 |                                                                                                                                                                                                                                                                                                                                                                                                                                                                                                                                                                                                                                                                                    |

SCHOLARONE™  
Manuscripts



I, the Submitting Author has the right to grant and does grant on behalf of all authors of the Work (as defined in the below author licence), an exclusive licence and/or a non-exclusive licence for contributions from authors who are: i) UK Crown employees; ii) where BMJ has agreed a CC-BY licence shall apply, and/or iii) in accordance with the terms applicable for US Federal Government officers or employees acting as part of their official duties; on a worldwide, perpetual, irrevocable, royalty-free basis to BMJ Publishing Group Ltd ("BMJ") its licensees and where the relevant Journal is co-owned by BMJ to the co-owners of the Journal, to publish the Work in this journal and any other BMJ products and to exploit all rights, as set out in our [licence](#).

The Submitting Author accepts and understands that any supply made under these terms is made by BMJ to the Submitting Author unless you are acting as an employee on behalf of your employer or a postgraduate student of an affiliated institution which is paying any applicable article publishing charge ("APC") for Open Access articles. Where the Submitting Author wishes to make the Work available on an Open Access basis (and intends to pay the relevant APC), the terms of reuse of such Open Access shall be governed by a Creative Commons licence – details of these licences and which [Creative Commons](#) licence will apply to this Work are set out in our licence referred to above.

Other than as permitted in any relevant BMJ Author's Self Archiving Policies, I confirm this Work has not been accepted for publication elsewhere, is not being considered for publication elsewhere and does not duplicate material already published. I confirm all authors consent to publication of this Work and authorise the granting of this licence.



1  
2  
3 **Vocal biomarker predicts fatigue in people with COVID-19: results from the**  
4 **prospective Predi-COVID cohort study**

5  
6 Abir Elbéji<sup>1</sup>, Lu Zhang<sup>2</sup>, Eduardo Higa<sup>1</sup>, Aurélie Fischer<sup>1</sup>, Vladimir Despotovic<sup>2</sup>, Petr V.  
7 Nazarov<sup>2</sup>, Gloria A. Aguayo<sup>1</sup>, Guy Fagherazzi<sup>1</sup>  
8  
9

10  
11  
12 1. Deep Digital Phenotyping Research Unit. Department of Precision Health.  
13 Luxembourg Institute of Health, 1 A-B rue Thomas Edison, L-1445 Strassen,  
14 Luxembourg  
15  
16

17  
18 2. Bioinformatics Platform. Luxembourg Institute of Health, 1A-B, rue Thomas Edison,  
19 L-1445 Strassen, Luxembourg  
20  
21  
22

23  
24  
25 **Reprints and correspondence:**

26 Dr Guy Fagherazzi, PhD, ADR

27 Director of Department of Precision Health

28 Head of the Deep Digital Phenotyping Research Unit

29  
30  
31 Luxembourg Institute of Health

32  
33 1 AB rue Thomas Edison, L-1445 STRASSEN, LUXEMBOURG

34  
35 Phone: +352 6 21 58 95 54

36  
37 Email: [guy.fagherazzi@lih.lu](mailto:guy.fagherazzi@lih.lu)

38  
39 Website: <https://ddp.lih.lu/>  
40  
41  
42  
43  
44  
45  
46  
47  
48  
49  
50  
51  
52  
53  
54  
55  
56  
57  
58  
59  
60

## Abstract

---

### Objective

To develop a vocal biomarker for fatigue monitoring in people with COVID-19.

**Design** Prospective cohort study.

**Setting** Predi-COVID data between May 2020 and May 2021.

### Participants

A total of 1772 voice recordings was used to train an AI-based algorithm to predict fatigue, stratified by gender and smartphone's operating system (Android/iOS). The recordings were collected from 296 participants tracked for two weeks following SARS-CoV-2 infection.

### primary and secondary outcome measures

Four machine learning algorithms (Logistic regression, k-nearest neighbors, support vector machine, and soft voting classifier) were used to train and derive the fatigue vocal biomarker. A t-test was used to evaluate the distribution of the vocal biomarker between the two classes (Fatigue and No fatigue).

### Results

The final study population included 56% of women and had a mean ( $\pm$ SD) age of 40 ( $\pm$ 13) years. Women were more likely to report fatigue ( $P<.001$ ). We developed four models for Android female, Android male, iOS female, and iOS male users with a weighted AUC of 86%, 82%, 79%, 85%, and a mean Brier Score of 0.15, 0.12, 0.17, 0.12, respectively. The vocal biomarker derived from the prediction models successfully discriminated COVID-19 participants with and without fatigue .

### Conclusions

This study demonstrates the feasibility of identifying and remotely monitoring fatigue thanks to voice. Vocal biomarkers, digitally integrated into telemedicine technologies, are expected to improve the monitoring of people with COVID-19 or Long-COVID.

---

**ClinicalTrials.gov Identifier: NCT04380987**

### Strengths and limitations

-This is the first study supporting the hypothesis that fatigue can be accurately monitored based on voice in people with COVID-19.

-The analyses were based on a multi-lingual database of standardized voice recordings collected in real-life from people with confirmed SARS-CoV-2 infection as determined by PCR.

-There is no similar dataset available yet in the literature to replicate our findings.

-The vocal biomarker is trained on a binary outcome (Fatigue, Yes/No) and does not reflect the entire spectrum of fatigue severity. Further work should be performed in that direction.

## Introduction

Coronavirus disease 2019 (COVID-19) is a global outbreak. More than 199 million confirmed cases of COVID-19 have been detected worldwide as of 4 August 2021, with more than 4 million deaths reported by the World Health Organization<sup>1</sup>. The worldwide population and healthcare systems have been greatly impacted by the COVID-19 pandemic. The pandemic has essentially put whole healthcare systems under pressure, requiring national or regional lockdowns<sup>2</sup>. Finding solutions that allow healthcare providers to focus on the more important and urgent patients, was, and still is, critical.

This outbreak continues to impact people, with many patients suffering from a range of acute symptoms, such as fatigue. Fatigue is a common symptom in patients with COVID-19 that can impact their quality of life, treatment adherence, and can be associated with numerous complications<sup>3</sup>. Recent findings showed that fatigue is a major symptom of the frequently reported Long-COVID syndrome. After recovering from the acute disease caused by the SARS outbreak, up to 60% of patients reported chronic fatigue 12 months later<sup>4</sup>. This supports the need for long-term monitoring solutions for these patients.

In general, fatigue can be of two types: physical and mental<sup>5</sup> experiencing lack of energy, inability to start and perform everyday activities, and lack of desire to do things. In the context of COVID-19, determinants of fatigue were categorized as both central and psychological factors, the latest might also be indirectly caused by pandemic-related fear and anxiety<sup>6,7</sup>.

Fatigue affects men and women differently and has previously been shown to be reported differently in the two genders. Men and women have different anatomy and physiology, resulting in significant sex differences in fatigability<sup>8</sup>.

Telemedicine, artificial intelligence (AI), and big data predictive analytics are examples of digital health technologies that have the potential to minimize the damaging effects of COVID-19 by improving responses to public health problems at a population level<sup>9</sup>. Using telemonitoring technologies to enable self-surveillance and remote monitoring of symptoms might therefore help to improve and personalize COVID-19 care delivery<sup>10</sup>.

1  
2  
3  
4  
5 Voice is a promising source of digital data since it is rich, user-friendly, inexpensive to  
6 collect, and non-invasive, and can be used to develop vocal biomarkers that  
7 characterize disease states. Previous research was mostly conducted in the field of  
8 neurodegenerative diseases, such as Parkinson's disease<sup>11</sup> and Alzheimer's  
9 disease<sup>12</sup>. There are also studies that confirm the relation of voice disorders to fatigue,  
10 e.g., in Chronic Fatigue Syndrome (CFS). Neuromuscular, neuropsychological and  
11 hormonal dysfunction associated with CFS can influence the phonation and  
12 articulation, and alter tension, viscosity and thickness of the tissue of the larynx, tongue  
13 and lips, leading to decreased voice quality<sup>13</sup>. Increased fatigue affects voice  
14 characteristics, such as pitch, word duration<sup>14</sup> and timing of articulated sounds<sup>15</sup>. Vocal  
15 changes related to fatigue are more observed in consonant sounds that require a high  
16 average airflow<sup>16</sup>.

17  
18  
19  
20  
21  
22  
23  
24  
25  
26  
27 In the context of the COVID-19 pandemic, respiratory sounds (e.g coughs, breathing,  
28 and voice) are also used as sources of information to develop COVID-19 screening  
29 tools<sup>17,18,19</sup>. However, no previous work has been devoted to investigating the  
30 association of voice with COVID-19 symptoms.

31  
32  
33  
34 We hypothesized that there is an association between fatigue and voice in patients  
35 with COVID-19 and that it is possible to train an AI-based model to identify fatigue and  
36 subsequently generate a digital vocal biomarker for fatigue monitoring. We used data  
37 from the large hybrid prospective Predi-COVID cohort study to investigate this  
38 hypothesis.

## 39 40 41 42 43 44 45 **Methods**

### 46 47 **Study design**

48 This project uses data from the Predi-COVID study<sup>20</sup>. Predi-COVID is a hybrid cohort  
49 study that started in May 2020 in Luxembourg and involved participants who should  
50 meet all of the following requirements: (1) a signed informed consent form; (2)  
51 participants with confirmed SARS-CoV-2 infection as determined by PCR at one of  
52 Luxembourg's certified laboratories; and (3) 18 years and older.

53  
54  
55  
56  
57  
58 This study combines data from the national surveillance system, which is used for  
59 virtually all COVID-19 positive patients. Biological sampling, electronic patient-

1  
2  
3 reported outcomes, and smartphone voice recording were collected to identify vocal  
4 biomarkers of respiratory syndromes and fatigue in this study. More details about the  
5 Predi-COVID study can be found elsewhere<sup>20</sup>.  
6  
7  
8  
9

10 Health Inspection collaborators made the initial phone contact with potential  
11 participants. Those who consented to participate were contacted by a qualified nurse  
12 from the Clinical and Epidemiological Investigation Center (CIEC - Luxembourg  
13 Institute of Health), who outlined the study and arranged home or hospital visits.  
14  
15  
16  
17

### 18 **Patient and Public Involvement**

19  
20 The Predi-COVID initiative was an emergency response from national research  
21 institutions grouped under 'Research Luxembourg' to fight the COVID-19 pandemic in  
22 Luxembourg and contribute to the general effort in the crisis. Therefore, for timing and  
23 safety reasons, patients with COVID-19 were not directly included to participate in the  
24 study design. However, the first participants included in Predi-COVID provided  
25 feedback on general workflow, data collection, questionnaires, and sampling, which  
26 was taken into account in an amendment to the protocol<sup>20</sup>.  
27  
28  
29  
30  
31  
32  
33

### 34 **Data collection**

35  
36 Participants were followed for up to a year using a smartphone app to collect voice  
37 data. To ensure a minimum quality level, participants were asked to record it in a quiet  
38 environment while maintaining a certain distance from the microphone, and an audio  
39 example of what was required was also provided.  
40  
41  
42  
43

44 All the participants of this study were invited to record two audio types. The first, Type  
45 1 audio, required participants to read paragraph 1 of article 25 of the Declaration of  
46 Human Rights<sup>21</sup>, in their preferred language: French, German, English, or Portuguese;  
47 and the second, Type 2 audio, required them to hold the [a] vowel phonation without  
48 breathing for as long as they could (see Supplementary Online Material 1 for more  
49 details).  
50  
51  
52  
53  
54

55  
56 Predi-COVID collects data in conformity with the German Society of Epidemiology's  
57 best practices guidelines<sup>22</sup>. To draft the manuscript, we followed the TRIPOD criteria  
58  
59  
60

1  
2  
3 for reporting AI-based model development and validation, as well as the corresponding  
4 checklist.  
5  
6  
7

8 All Predi-COVID participants recruited between May 2020 and May 2021 who reported  
9 their fatigue status (“I feel well” as “No Fatigue” and “I am fatigued”/“I don’t feel well”  
10 as “Fatigue”) on the same day as the audio recordings during the 14 days of follow-up  
11 were included in this study<sup>23</sup>. As a result, several audio recordings for a single  
12 participant were available for both audio types<sup>24</sup>.  
13  
14  
15  
16

### 17 **Audio characteristics and vocal biomarker training**

18 The audio recordings were collected in two formats, 3gp format (Android devices) and  
19 m4a format (iOS devices). Based on the smartphone’s operating system and the  
20 user’s gender (male/female), we trained one model for each category. This  
21 stratification was performed to minimize data heterogeneity and deal with sex as a  
22 potential confounding bias.  
23  
24  
25  
26  
27  
28  
29

#### 30 *Audio pre-processing*

31 All of the raw audio recordings were pre-processed (Figure 1). They were initially  
32 converted to .wav files, with audios lasting less than 2 seconds being excluded. Then,  
33 an audio clustering (DBSCAN) on basic features (duration, average, sum, and  
34 standard deviation of signal power, and fundamental frequency) was performed to  
35 detect outliers that were manually checked while excluding poor quality audios with 1)  
36 too noisy, 2) incorrect text reading, 3) type 1 and type 2 audios mixed, or 4) extended  
37 silence in the middle. Finally, peak normalization was used to boost the volume of quiet  
38 audio segments, and leading and trailing silences longer than 350 milliseconds were  
39 trimmed.  
40  
41  
42  
43  
44  
45  
46  
47  
48

#### 49 *Feature extraction*

50 We used transfer learning for the feature extraction process since it is adapted for  
51 small training databases<sup>25</sup>. Transfer learning is a technique where a model is  
52 constructed and trained with a set containing a large amount of data and then transfer  
53 and apply this learning to our dataset on top of it. It has the advantage of reducing the  
54 amount of data required while shortening training time and improving performance  
55 when compared to models built from scratch<sup>26</sup>.  
56  
57  
58  
59  
60

1  
2  
3  
4  
5 Convolutional neural networks require a fixed input size, whereas audio instances in  
6 our dataset were of variable length. To deal with this issue, Zero-padding was used to  
7 set the duration of each audio file to 50 seconds (the maximum length in our database).  
8  
9 To raise the amount of information fed to the classifiers, type 1 (text reading) and type  
10 2 ([a] phonation) audios were concatenated and used as a single input to the learning  
11 models.  
12  
13  
14  
15  
16

17 All the audio recordings were first resampled to 8kHz and then converted to Mel-  
18 spectrograms using the Librosa library in Python. The hop-length was 2048 samples,  
19 and the number of Mel coefficients was set to 196. The Mel spectrograms were passed  
20 through VGG19 convolutional neural network architecture provided by Keras, which  
21 was pre-trained on the ImageNet database<sup>27</sup>. This approach, presented in Figure 2,  
22 may be considered as a feature extraction step, as it converts audio recordings to 512  
23 feature maps, each of a size 6x6, leading to a total of 18432 features.  
24  
25  
26  
27  
28  
29

30 This large number of features is computationally expensive. Principal Component  
31 Analysis (PCA)<sup>28</sup> is therefore used for dimensionality reduction and to select the  
32 number of relevant components explaining the maximum of the variance in the data.  
33  
34  
35  
36  
37  
38  
39  
40  
41  
42  
43  
44  
45  
46  
47  
48  
49  
50  
51  
52  
53  
54  
55  
56  
57  
58  
59  
60



## Statistical analysis

We divided our data into “Fatigue” and “No Fatigue” groups based on the participant’s reported answers for the inclusion and daily fatigue assessment of Predi-COVID. To characterize participants, descriptive statistics were used, which included means, standard deviations for quantitative variables, and counts and percentages for qualitative variables. The two population groups (3gp (Android users) and m4a (iOS users)) were compared using a student test for continuous variables, and a  $\chi^2$  test for categorical variables.

A 10-fold cross-validation procedure was conducted on the training cohort participants to evaluate four classification models (logistic regression (LR), k-nearest neighbors (KNN), support vector machine (SVM), and soft voting classifier (VC), scikit-learn implementation in Python) at different regularization levels via a grid search, with the following evaluation metrics: area under the ROC curve (AUC), accuracy, F1-score, precision, and recall. The Brier score was also used to evaluate the calibration of the selected models.

The predicted probability of being classified as fatigued from the best model was considered as our final vocal biomarker, which may be used as a quantitative metric to monitor fatigue.

We evaluated the vocal biomarker’s distribution in both classes (Fatigue and No Fatigue) and performed a t-test between the two groups.

## Results

### Study population characteristics

The final study population is composed of 296 participants of whom 165 were women (56%), with an average age of 40 years (SD = 13). To record both audio types, 109 (37%) participants utilized Android smartphones (3gp format), whereas 187 (63%) used iOS devices (m4a format). We found no difference in the distribution of age, gender, body mass index, smoking, antibiotic usage, and asthma, between the two types of devices ( $P$ -value > .05). The overall rate of comorbidities in this study was relatively low: there were 31 (10%) participants who used antibiotics and only 12 (4%) participants with asthma. More details are shown in Table 1.

1  
2  
3  
4  
5  
6  
7  
8  
9  
10  
11  
12  
13  
14  
15  
16  
17  
18  
19  
20  
21  
22  
23  
24  
25  
26  
27  
28  
29  
30  
31  
32  
33  
34  
35  
36  
37  
38  
39  
40  
41  
42  
43  
44  
45  
46  
47  
48  
49  
50  
51  
52  
53  
54  
55  
56  
57  
58  
59  
60

For peer review only

**Table 1: Study population characteristics**

The clinical data in the table above describe the overall population of the study. The total number and its percentage are used to represent all categorical data. The table below summarizes general information for describing audio data.

All p-values comparing iOS (m4a) and Andoid users (3gp) were calculated using chi2

and Student's t-tests.

|                                                                                                |                | All         | m4a         |             | 3gp         |             | P-values<br>(m4a, 3gp) |
|------------------------------------------------------------------------------------------------|----------------|-------------|-------------|-------------|-------------|-------------|------------------------|
|                                                                                                |                |             | Female      | Male        | Female      | Male        |                        |
| <b>Participants (N)</b>                                                                        | Total          | 296         | 107         | 80          | 51          | 58          | -                      |
| <b>Age (years)</b>                                                                             | mean (SD)      | 40.3 (12.6) | 38.8 (13.4) | 42.9 (12.7) | 37.8 (11.6) | 41.5 (11.3) | 0.28                   |
| <b>Body Mass Index (kg/m<sup>2</sup>)</b>                                                      | mean (SD)      | 24.1 (4.7)  | 24.6 (5.5)  | 26.5 (4.1)  | 24.1 (3.8)  | 26.6 (4.17) | 0.95                   |
| <b>Antibiotic (%)</b>                                                                          | No             | 265 (90%)   | 93 (87%)    | 73 (91%)    | 44 (86%)    | 55 (95%)    | 0.87                   |
|                                                                                                | Yes            | 31 (10%)    | 14 (13%)    | 7 (9%)      | 7 (14%)     | 3 (5%)      |                        |
| <b>Asthma (%)</b>                                                                              | No             | 284 (96%)   | 104 (97%)   | 75 (94%)    | 47 (92%)    | 58 (100%)   | 0.82                   |
|                                                                                                | Yes            | 12 (4%)     | 3 (3%)      | 5 (6%)      | 4 (8%)      | 0 (0%)      |                        |
| <b>Smoking (%)</b>                                                                             | Never          | 199 (67%)   | 77 (72%)    | 51 (64%)    | 36 (71%)    | 35 (60%)    | 0.41                   |
|                                                                                                | Former smoker  | 53 (18%)    | 19 (18%)    | 20 (25%)    | 9 (18%)     | 13 (22%)    |                        |
|                                                                                                | Current smoker | 44 (15%)    | 11 (10%)    | 9 (11%)     | 6 (11%)     | 10 (18%)    |                        |
| <b>Audio recordings</b>                                                                        | Total          | 1772        | 584         | 499         | 345         | 344         | <0.001                 |
|                                                                                                | No Fatigue     | 1222 (69%)  | 394 (67%)   | 370 (74%)   | 190 (55%)   | 268 (78%)   |                        |
|                                                                                                | Fatigue        | 550 (31%)   | 190 (33%)   | 129 (26%)   | 155 (45%)   | 76 (22%)    |                        |
| <b>Mean (SD) and maximum of audio recording per participant in the 14-day follow-up period</b> | mean (SD)      | 6 (5)       | 6 (5)       | 6 (5)       | 6 (5)       | 6 (5)       | -                      |
|                                                                                                | max            | 16          | 14          | 16          | 15          | 14          |                        |

Participants reported their fatigue status on average 6 days during the first 14 days of follow-up, resulting in the analysis of 1772 audio recordings for each audio type (type 1 and type 2) when all inclusion criteria were met, including 550 audio recordings for participants with fatigue. In both audio sets, women reported experiencing fatigue at a higher rate than men ( $P$ -value<.001). Women constituted 155 (60%) of all fatigued Android users and 190 (67%) of all fatigued iOS users.

## Prediction models

We reduced the extracted features from Mel-spectrograms to 250 top components with PCA, explaining 97% and 99% of the variance in the data for iOS and Android audio sets respectively. We then compared the performances of the machine learning algorithms to select the best models for the derivation of the vocal biomarkers.

The voting classifier was the best model selected for the development of the vocal biomarker for male iOS users, with an AUC of 85% and overall accuracy, precision, recall, and f1-score of 89%. The model selected for female iOS users was SVM with an overall precision of 79% and an AUC of 79%. For male Android users, the selected model is the voting classifier with a precision, recall and f1-score of 84%, and a weighted AUC of 82%. For female Android users, the SVM was selected with an overall precision of 80% and an AUC of 86%. More details are shown in Table 2. The calibrations of the selected models were good (Mean Brier Scores = 0.15, 0.12, 0.17, and 0.12 respectively for Android female users, Android male users, iOS female users, and iOS male users).

## Derivation of the digital fatigue vocal biomarker

Based on the model selected for each audio set, we derived the trained vocal biomarkers which quantitatively represent the probability of being labeled as fatigued. As shown in Figure 3, we found a significant difference in the distributions of vocal biomarkers between the fatigue and no fatigue classes in our testing dataset.

**Table 2: Results of the prediction models**

The selected models were selected using Recall<sub>1</sub> and weighted AUC and are highlighted in bold. Class 0: No fatigue, Class 1: Fatigue

| Audio_format  | Gender | ML model   | Accuracy    | Ov.Precision | Precision_0 | Precision_1 | Ov.Recall   | Recall_0    | Recall_1    | Ov.f1score  | f1-score_0  | f1-score_1  | Weighted AUC |
|---------------|--------|------------|-------------|--------------|-------------|-------------|-------------|-------------|-------------|-------------|-------------|-------------|--------------|
| 3gp (Android) | Female | LR         | 0.77        | 0.77         | 0.81        | 0.73        | 0.77        | 0.76        | 0.77        | 0.77        | 0.78        | 0.75        | 0.85         |
|               |        | KNN        | 0.72        | 0.73         | 0.70        | 0.77        | 0.72        | 0.87        | 0.55        | 0.72        | 0.78        | 0.64        | 0.76         |
|               |        | <b>SVM</b> | <b>0.80</b> | <b>0.80</b>  | <b>0.80</b> | <b>0.79</b> | <b>0.80</b> | <b>0.84</b> | <b>0.74</b> | <b>0.80</b> | <b>0.82</b> | <b>0.77</b> | <b>0.86</b>  |
|               |        | VC         | 0.78        | 0.78         | 0.81        | 0.75        | 0.78        | 0.79        | 0.77        | 0.78        | 0.80        | 0.76        | 0.86         |
|               | Male   | LR         | 0.78        | 0.79         | 0.87        | 0.50        | 0.78        | 0.85        | 0.53        | 0.79        | 0.86        | 0.52        | 0.81         |
|               |        | KNN        | 0.83        | 0.83         | 0.83        | 0.80        | 0.83        | 0.98        | 0.27        | 0.79        | 0.90        | 0.40        | 0.84         |
|               |        | SVM        | 0.84        | 0.83         | 0.88        | 0.67        | 0.84        | 0.93        | 0.53        | 0.83        | 0.90        | 0.59        | 0.82         |
|               |        | <b>VC</b>  | <b>0.84</b> | <b>0.84</b>  | <b>0.89</b> | <b>0.64</b> | <b>0.84</b> | <b>0.91</b> | <b>0.60</b> | <b>0.84</b> | <b>0.90</b> | <b>0.62</b> | <b>0.82</b>  |
| m4a (iOS)     | Female | LR         | 0.72        | 0.72         | 0.80        | 0.56        | 0.72        | 0.77        | 0.61        | 0.72        | 0.79        | 0.58        | 0.75         |
|               |        | KNN        | 0.68        | 0.65         | 0.72        | 0.50        | 0.68        | 0.86        | 0.29        | 0.65        | 0.78        | 0.37        | 0.67         |
|               |        | <b>SVM</b> | <b>0.79</b> | <b>0.79</b>  | <b>0.81</b> | <b>0.75</b> | <b>0.79</b> | <b>0.91</b> | <b>0.55</b> | <b>0.79</b> | <b>0.86</b> | <b>0.64</b> | <b>0.79</b>  |
|               |        | VC         | 0.77        | 0.76         | 0.80        | 0.69        | 0.77        | 0.89        | 0.53        | 0.76        | 0.84        | 0.60        | 0.78         |
|               | Male   | LR         | 0.73        | 0.74         | 0.83        | 0.48        | 0.73        | 0.80        | 0.54        | 0.73        | 0.81        | 0.51        | 0.80         |
|               |        | KNN        | 0.89        | 0.89         | 0.89        | 0.89        | 0.89        | 0.97        | 0.65        | 0.88        | 0.93        | 0.76        | 0.81         |
|               |        | SVM        | 0.85        | 0.84         | 0.86        | 0.76        | 0.85        | 0.95        | 0.58        | 0.84        | 0.90        | 0.67        | 0.85         |
|               |        | <b>VC</b>  | <b>0.89</b> | <b>0.89</b>  | <b>0.89</b> | <b>0.89</b> | <b>0.89</b> | <b>0.97</b> | <b>0.65</b> | <b>0.88</b> | <b>0.93</b> | <b>0.76</b> | <b>0.85</b>  |

KNN: K-Nearest Neighbors, LR: Logistic Regression, Ov. : Overall, SVM: Support Vector Machine, VC: Voting Classifier

## Discussion

In this study, we built an AI-based pipeline to develop a vocal biomarker for both genders and both types of smartphones (male/female, Android/iOS) that effectively recognize fatigued and non-fatigued participants with COVID-19.

We stratified the data to prevent data heterogeneity, which is considered contamination and makes it difficult to build a reliable and consistent classification model(s), resulting in poorer prediction performance. This contamination is caused by two factors: first, significant gender differences in fatigability, since it has previously been shown that men and women experience and report fatigue differently, and second, different microphone types incorporated in both smartphone devices used by the participants (iOS and Android), which have a direct impact on the quality of the recorded audios (machine learning algorithms separate the audio formats rather than the fatigue status if there is no constant microphone. (see Supplementary Online Material 2 for more details).

With the increased interest in remote voice analysis as a noninvasive and powerful telemedicine tool, various studies have been carried out, mostly in neurological disorders (eg, Parkinson's disease<sup>11</sup> and Alzheimer's disease<sup>29</sup>) and mental health (eg, stress and depression<sup>30</sup>). Recently, a significant research effort has evolved to employ respiratory sounds for COVID-19 and the main focus was on the use of cough<sup>17,31</sup> and breathing<sup>32</sup> to develop a COVID-19 screening tool. However, no previous work has been devoted to investigating the association of voice with COVID-19 symptoms, precisely fatigue.

Fatigue is one of the commonly reported symptoms of COVID-19 and Long-COVID syndrome<sup>33</sup>, which can persist regardless of how severe COVID-19's acute stage is<sup>34</sup>. A variety of cerebral, peripheral, and psychosocial factors<sup>35,7</sup> play a role in the development of fatigue. It may also occur from chronic inflammation in the brain and at neuromuscular junctions. New evidence shows that patients with Long-COVID syndrome continue to have higher measures of blood clotting, thrombosis<sup>36</sup>, which may also explain the persistence of fatigue. COVID-19 is associated with variations in airway resistance<sup>37</sup>. This narrowing of the airway is manifested in the increase in

1  
2  
3 audible turbulence in both sighing and yawning, which is frequently associated with  
4 fatigue<sup>38</sup>.  
5  
6  
7

8 Human voice is produced by the flow of air from the lungs through the larynx, which  
9 causes the vocal fold vibrations, generating a pulsating air stream<sup>39</sup>. The process is  
10 controlled by the laryngeal muscle activation<sup>40</sup> but involves the entire respiratory  
11 system to provide the air pressure necessary for phonation. Decreased pulmonary  
12 function in COVID-19 patients can cause reduced glottal airflow that is essential for  
13 normal voice production<sup>41</sup>. Furthermore, in case of increased fatigue, the voice  
14 production process may be additionally disturbed due to reduced laryngeal muscle  
15 tension, resulting in dysphonia that appears in up to 49% of COVID-19 patients<sup>41</sup>.  
16  
17  
18  
19  
20  
21  
22  
23

### 24 **Study Limitations**

25 This study has several limitations. First, although our data was stratified based on  
26 gender and smartphone devices, the mix of languages might also result in different  
27 voice features subsequently, in different model performances. There is presently no  
28 comparable dataset with similar audio recordings for further external validation of our  
29 findings. Thus, more data should be collected to improve the transferability of our vocal  
30 biomarker to other populations. Second, our data labeling was only based on a  
31 qualitative self-reported fatigue status. A fatigue severity scale would allow a  
32 quantitative assessment of fatigue severity in a uniform and unbiased way throughout  
33 all participants. Finally, time series voice analysis for each participant was not included  
34 in the study. More investigation, including time series analysis, would establish a  
35 personalized baseline for each participant, potentially enhancing the performance of  
36 our vocal biomarkers.  
37  
38  
39  
40  
41  
42  
43  
44  
45  
46  
47

### 48 **Conclusion**

49 In this study, we demonstrated the association between fatigue and voice in people  
50 with COVID-19 and developed a fatigue vocal biomarker that can accurately predict  
51 the presence of fatigue. These findings suggest that vocal biomarkers, digitally  
52 incorporated into telemonitoring technologies, might be used to identify and remotely  
53 monitor this symptom in patients suffering from COVID-19 as well as other chronic  
54 diseases.  
55  
56  
57  
58  
59  
60

## Acknowledgments

We thank all participants that accepted to be involved in the study, members that collaborated to the launch and monitoring of the Predi-COVID cohort, as well as its scientific committee, the IT team responsible for the development of the application, and the nurses in charge of recruitment, data collection, and management on the field.

## Contributors

Elbéji and Fagherazzi had full access to all of the data in the study and took responsibility for the integrity of the data and the accuracy of the data analysis.

Fagherazzi, Zhang, and Fischer conceptualized and designed the study.

Elbéji, Zhang, Higa, Fischer, Despotovic, Nazarov, Aguayo, and Fagherazzi collected and analyzed data and contributed to the interpretation.

The statistical analysis was carried out by Elbéji, Zhang, Higa, and Fischer.

Elbéji drafted the initial manuscript. Elbéji, Zhang, Higa, Fischer, Despotovic, Nazarov, Aguayo, and Fagherazzi critically revised the manuscript for more important intellectual content. Fagherazzi obtained the funding. Fischer provided administrative, technical, and material support. The corresponding author certifies that all listed authors fulfill the authorship criteria and that no other authors that meet the criteria have been omitted.

## Funding Statement

The Predi-COVID study is supported by the Luxembourg National Research Fund (FNR) (Predi-COVID, grant number 14716273), the André Losch Foundation, and the Luxembourg Institute of Health.

**Competing interests:** None declared.



## Data Sharing Statement

Audio data, datasets and source code used in this study are publicly available.

Audio data available in Zenodo repository, [DOI: 10.5281/zenodo.5937844]

Datasets and source code available in Github, [https://github.com/LIHVOICE/Predi\_COVID\_Fatigue\_Vocal\_Biomarker].

## Ethics Statement

The National Research Ethics Committee of Luxembourg (study number 202003/07) gave a favorable opinion to the study in April 2020.

## References

- 1 WHO Coronavirus (COVID-19) Dashboard. <https://covid19.who.int> (accessed Aug 5, 2021).
- 2 Website. <https://www.oecd.org/coronavirus/policy-responses/the-territorial-impact-of-covid-19-managing-the-crisis-and-recovery-across-levels-of-government-a2c6abaf/>.
- 3 Qi R, Chen W, Liu S, *et al*. Psychological morbidities and fatigue in patients with confirmed COVID-19 during disease outbreak: prevalence and associated biopsychosocial risk factors. *medRxiv* 2020; : 2020.05.08.20031666.
- 4 Tansey CM, Louie M, Loeb M, *et al*. One-year outcomes and health care utilization in survivors of severe acute respiratory syndrome. *Arch Intern Med* 2007; **167**: 1312–20.
- 5 Neuropsychological and neurophysiological correlates of fatigue in post-acute patients with neurological manifestations of COVID-19: Insights into a challenging symptom. *J Neurol Sci* 2021; **420**: 117271.
- 6 Rudroff T, Fietsam AC, Deters JR, Bryant AD, Kamholz J. Post-COVID-19 Fatigue: Potential Contributing Factors. *Brain Sciences* 2020; **10**: 1012.
- 7 Morgul E, Bener A, Atak M, *et al*. COVID-19 pandemic and psychological fatigue in Turkey. *International Journal of Social Psychiatry*. 2021; **67**: 128–35.

- 1  
2  
3 8 Hunter SK. Sex differences in human fatigability: mechanisms and insight to  
4 physiological responses. *Acta Physiol* 2014; **210**: 768–89.  
5  
6  
7  
8 9 Gunasekeran DV, Tseng RMW, Tham Y-C, Wong TY. Applications of digital  
9 health for public health responses to COVID-19: a systematic scoping review of  
10 artificial intelligence, telehealth and related technologies. *NPJ Digital Medicine*  
11 2021; **4**. DOI:10.1038/s41746-021-00412-9.  
12  
13  
14  
15 10 DeMerle K, Angus DC, Seymour CW. Precision Medicine for COVID-19:  
16 Phenotype Anarchy or Promise Realized? *JAMA* 2021; **325**: 2041–2.  
17  
18  
19  
20 11 Tracy JM, Özkanca Y, Atkins DC, Hosseini GR. Investigating voice as a  
21 biomarker: Deep phenotyping methods for early detection of Parkinson’s disease.  
22 *J Biomed Inform* 2020; **104**. DOI:10.1016/j.jbi.2019.103362.  
23  
24  
25  
26 12 Laguarta J, Subirana B. Longitudinal Speech Biomarkers for Automated  
27 Alzheimer’s Detection. *Frontiers in Computer Science*. 2021; **3**.  
28 DOI:10.3389/fcomp.2021.624694.  
29  
30  
31  
32 13 Cho S-W, Yin CS, Park Y-B, Park Y-J. Differences in self-rated, perceived, and  
33 acoustic voice qualities between high- and low-fatigue groups. *J Voice* 2011; **25**:  
34 544–52.  
35  
36  
37  
38 14 Whitmore J, Fisher S. Speech during sustained operations. *Speech*  
39 *Communication*. 1996; **20**: 55–70.  
40  
41  
42  
43 15 Vollrath M. Automatic measurement of aspects of speech reflecting motor  
44 coordination. *Behavior Research Methods, Instruments, & Computers*. 1994; **26**:  
45 35–40.  
46  
47  
48  
49 16 Greeley HP, Berg J, Friets E, *et al*. Fatigue estimation using voice analysis.  
50 *Behavior Research Methods*. 2007; **39**: 610–9.  
51  
52  
53  
54 17 Detection of COVID-19 from voice, cough and breathing patterns: Dataset and  
55 preliminary results. *Comput Biol Med* 2021; **138**: 104944.  
56  
57  
58  
59 18 Orlandic L, Teijeiro T, Atienza D. The COUGHVID crowdsourcing dataset, a  
60 corpus for the study of large-scale cough analysis algorithms. *Scientific Data*.

- 2021; **8**. DOI:10.1038/s41597-021-00937-4.
- 19 Bartl-Pokorny KD, Pokorny FB, Batliner A, *et al*. The voice of COVID-19: Acoustic correlates of infection in sustained vowels. *J Acoust Soc Am* 2021; **149**: 4377.
- 20 Fagherazzi G, Fischer A, Betsou F, *et al*. Protocol for a prospective, longitudinal cohort of people with COVID-19 and their household members to study factors associated with disease severity: the Predi-COVID study. *BMJ Open* 2020; **10**: e041834.
- 21 United Nations. Universal Declaration of Human Rights | United Nations. <https://www.un.org/en/about-us/universal-declaration-of-human-rights> (accessed Nov 18, 2021).
- 22 Hoffmann W, Latza U, Baumeister SE, *et al*. Guidelines and recommendations for ensuring Good Epidemiological Practice (GEP): a guideline developed by the German Society for Epidemiology. *Eur J Epidemiol* 2019; **34**: 301–17.
- 23 [datasets]  
LIHVOICE.Predi\_COVID\_Fatigue\_Vocal\_Biomarker/Android\_audioset.csv at main · LIHVOICE/Predi\_COVID\_Fatigue\_Vocal\_Biomarker. GitHub. [https://github.com/LIHVOICE/Predi\\_COVID\\_Fatigue\\_Vocal\\_Biomarker](https://github.com/LIHVOICE/Predi_COVID_Fatigue_Vocal_Biomarker) (accessed Jan 31, 2022).
- 24 [datasets] Elbéji A, Zhang L, Higa E, *et al*. Audio recordings of COVID-19 positive individuals from the prospective Predi-COVID cohort study with their fatigue status. 2022; published online Feb 1. DOI:10.5281/zenodo.5937844.
- 25 Barman R, Deshpande S, Agarwal S, Inamdar U, Devare M. Transfer Learning for Small Dataset. 2019; published online March 26. <http://dx.doi.org/> (accessed Nov 18, 2021).
- 26 Weiss K, Khoshgoftaar TM, Wang D. A survey of transfer learning. *Journal of Big Data* 2016; **3**: 1–40.
- 27 Simonyan K, Zisserman A. Very Deep Convolutional Networks for Large-Scale Image Recognition. 2014; published online Sept 4. <http://arxiv.org/abs/1409.1556>

(accessed Aug 6, 2021).

- 28 Hasan BMS, Abdulazeez AM. A Review of Principal Component Analysis Algorithm for Dimensionality Reduction. *Journal of Soft Computing and Data Mining* 2021; **2**: 20–30.
- 29 König A, Satt A, Sorin A, *et al.* Automatic speech analysis for the assessment of patients with predementia and Alzheimer’s disease. *Alzheimer’s & dementia (Amsterdam, Netherlands)* 2015; **1**. DOI:10.1016/j.dadm.2014.11.012.
- 30 Zhang L, Duvvuri R, Chandra KKL, Nguyen T, Ghomi RH. Automated voice biomarkers for depression symptoms using an online cross-sectional data collection initiative. *Depress Anxiety* 2020; **37**. DOI:10.1002/da.23020.
- 31 Noninvasive Vocal Biomarker is Associated With Severe Acute Respiratory Syndrome Coronavirus 2 Infection. *Mayo Clinic Proceedings: Innovations, Quality & Outcomes* 2021; **5**: 654–62.
- 32 COVID-19 Sounds App. <http://www.covid-19-sounds.org/> (accessed Nov 18, 2021).
- 33 Goërtz YMJ, Van Herck M, Delbressine JM, *et al.* Persistent symptoms 3 months after a SARS-CoV-2 infection: the post-COVID-19 syndrome? *ERJ Open Res* 2020; **6**. DOI:10.1183/23120541.00542-2020.
- 34 Townsend L, Dyer AH, Jones K, *et al.* Persistent fatigue following SARS-CoV-2 infection is common and independent of severity of initial infection. *PLoS One* 2020; **15**: e0240784.
- 35 Arnold P, Njemini R, Vantieghem S, *et al.* Peripheral muscle fatigue in hospitalised geriatric patients is associated with circulating markers of inflammation. *Experimental Gerontology*. 2017; **95**: 128–35.
- 36 Fogarty H, Townsend L, Morrin H, *et al.* Persistent endotheliopathy in the pathogenesis of long COVID syndrome. *J Thromb Haemost* 2021; **19**. DOI:10.1111/jth.15490.
- 37 Pan S-Y, Ding M, Huang J, Cai Y, Huang Y-Z. Airway resistance variation

1  
2  
3 correlates with prognosis of critically ill COVID-19 patients: A computational fluid  
4 dynamics study. *Comput Methods Programs Biomed* 2021; **208**: 106257.

- 5  
6  
7  
8 38 Murry T. *The voice and its disorders*, 4th edition. By Margaret C. L. Greene, 446  
9 pp, illus, J. B. Lippincott Co., Philadelphia, PA, 1980. \$47.50. 1981.  
10 DOI:10.1002/HED.2890030517.  
11  
12  
13 39 Zörner S, Kaltenbacher M, Döllinger M. Investigation of prescribed movement in  
14 fluid–structure interaction simulation for the human phonation process.  
15 *Computers & Fluids*. 2013; **86**: 133–40.  
16  
17 40 Yin J, Zhang Z. Laryngeal muscular control of vocal fold posturing: Numerical  
18 modeling and experimental validation. *J Acoust Soc Am* 2016; **140**: EL280.  
19  
20 41 Dassie-Leite AP, Gueths TP, Ribeiro VV, Pereira EC, Martins P do N, Daniel CR.  
21 Vocal Signs and Symptoms Related to COVID-19 and Risk Factors for their  
22 Persistence. *J Voice* 2021; published online Aug 11.  
23 DOI:10.1016/j.jvoice.2021.07.013.  
24  
25  
26  
27  
28  
29  
30  
31

## 32 **Legends**

33  
34  
35 **Table 1:** Study population characteristics

36 **Table 2:** Results of the prediction models

37 **Figure 1.** General Pipeline

38 **Figure 2.** VGG19 Feature Extraction

39 **Figure 3.** Derivation of the digital fatigue vocal biomarker for Android and iOS users.

40 **SOM 1.** Text to read

41 **SOM 2.** VGG19 extracted features from participants' audio recordings  
42  
43  
44  
45  
46  
47  
48  
49  
50  
51  
52  
53  
54  
55  
56  
57  
58  
59  
60

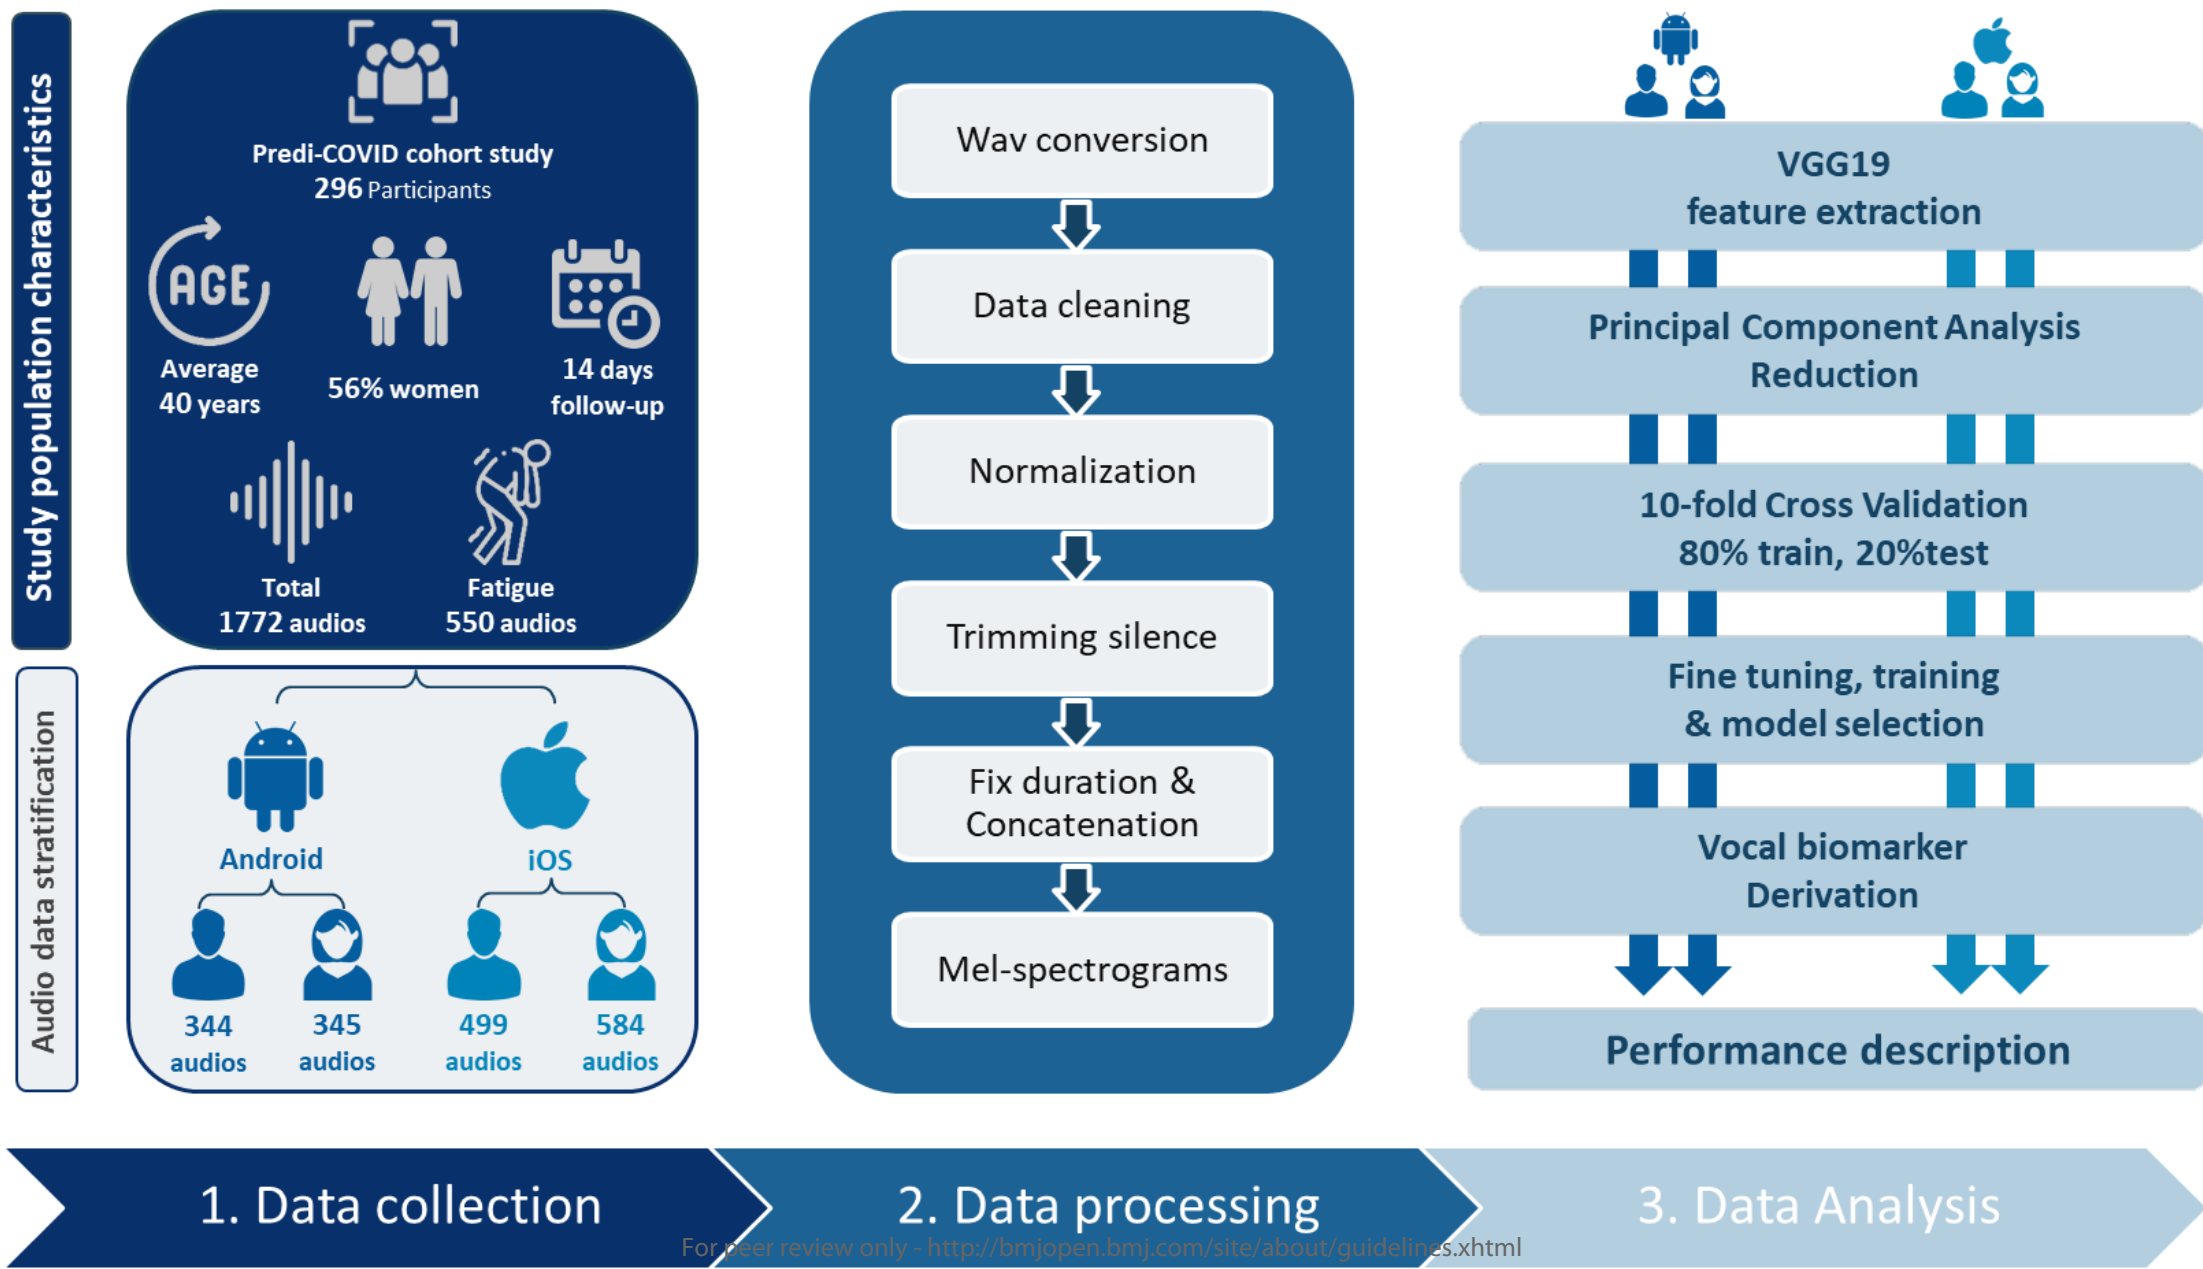

1  
2  
3  
4  
5  
6  
7  
8  
9  
10  
11  
12  
13  
14  
15  
16  
17  
18  
19  
20  
21  
22  
23  
24  
25  
26  
27  
28  
29  
30  
31  
32  
33  
34  
35  
36  
37  
38  
39  
40  
41

1  
2  
3  
4  
5  
6  
7  
8  
9  
10  
11  
12  
13  
14  
15  
16  
17  
18  
19  
20  
21  
22  
23  
24  
25  
26  
27  
28  
29  
30  
31  
32  
33  
34  
35  
36  
37  
38  
39  
40  
41



1  
2  
3  
4  
5  
6  
7  
8  
9  
10  
11  
12  
13  
14  
15  
16  
17  
18  
19  
20  
21  
22  
23  
24  
25  
26  
27  
28  
29  
30  
31  
32  
33  
34  
35  
36  
37  
38  
39  
40  
41

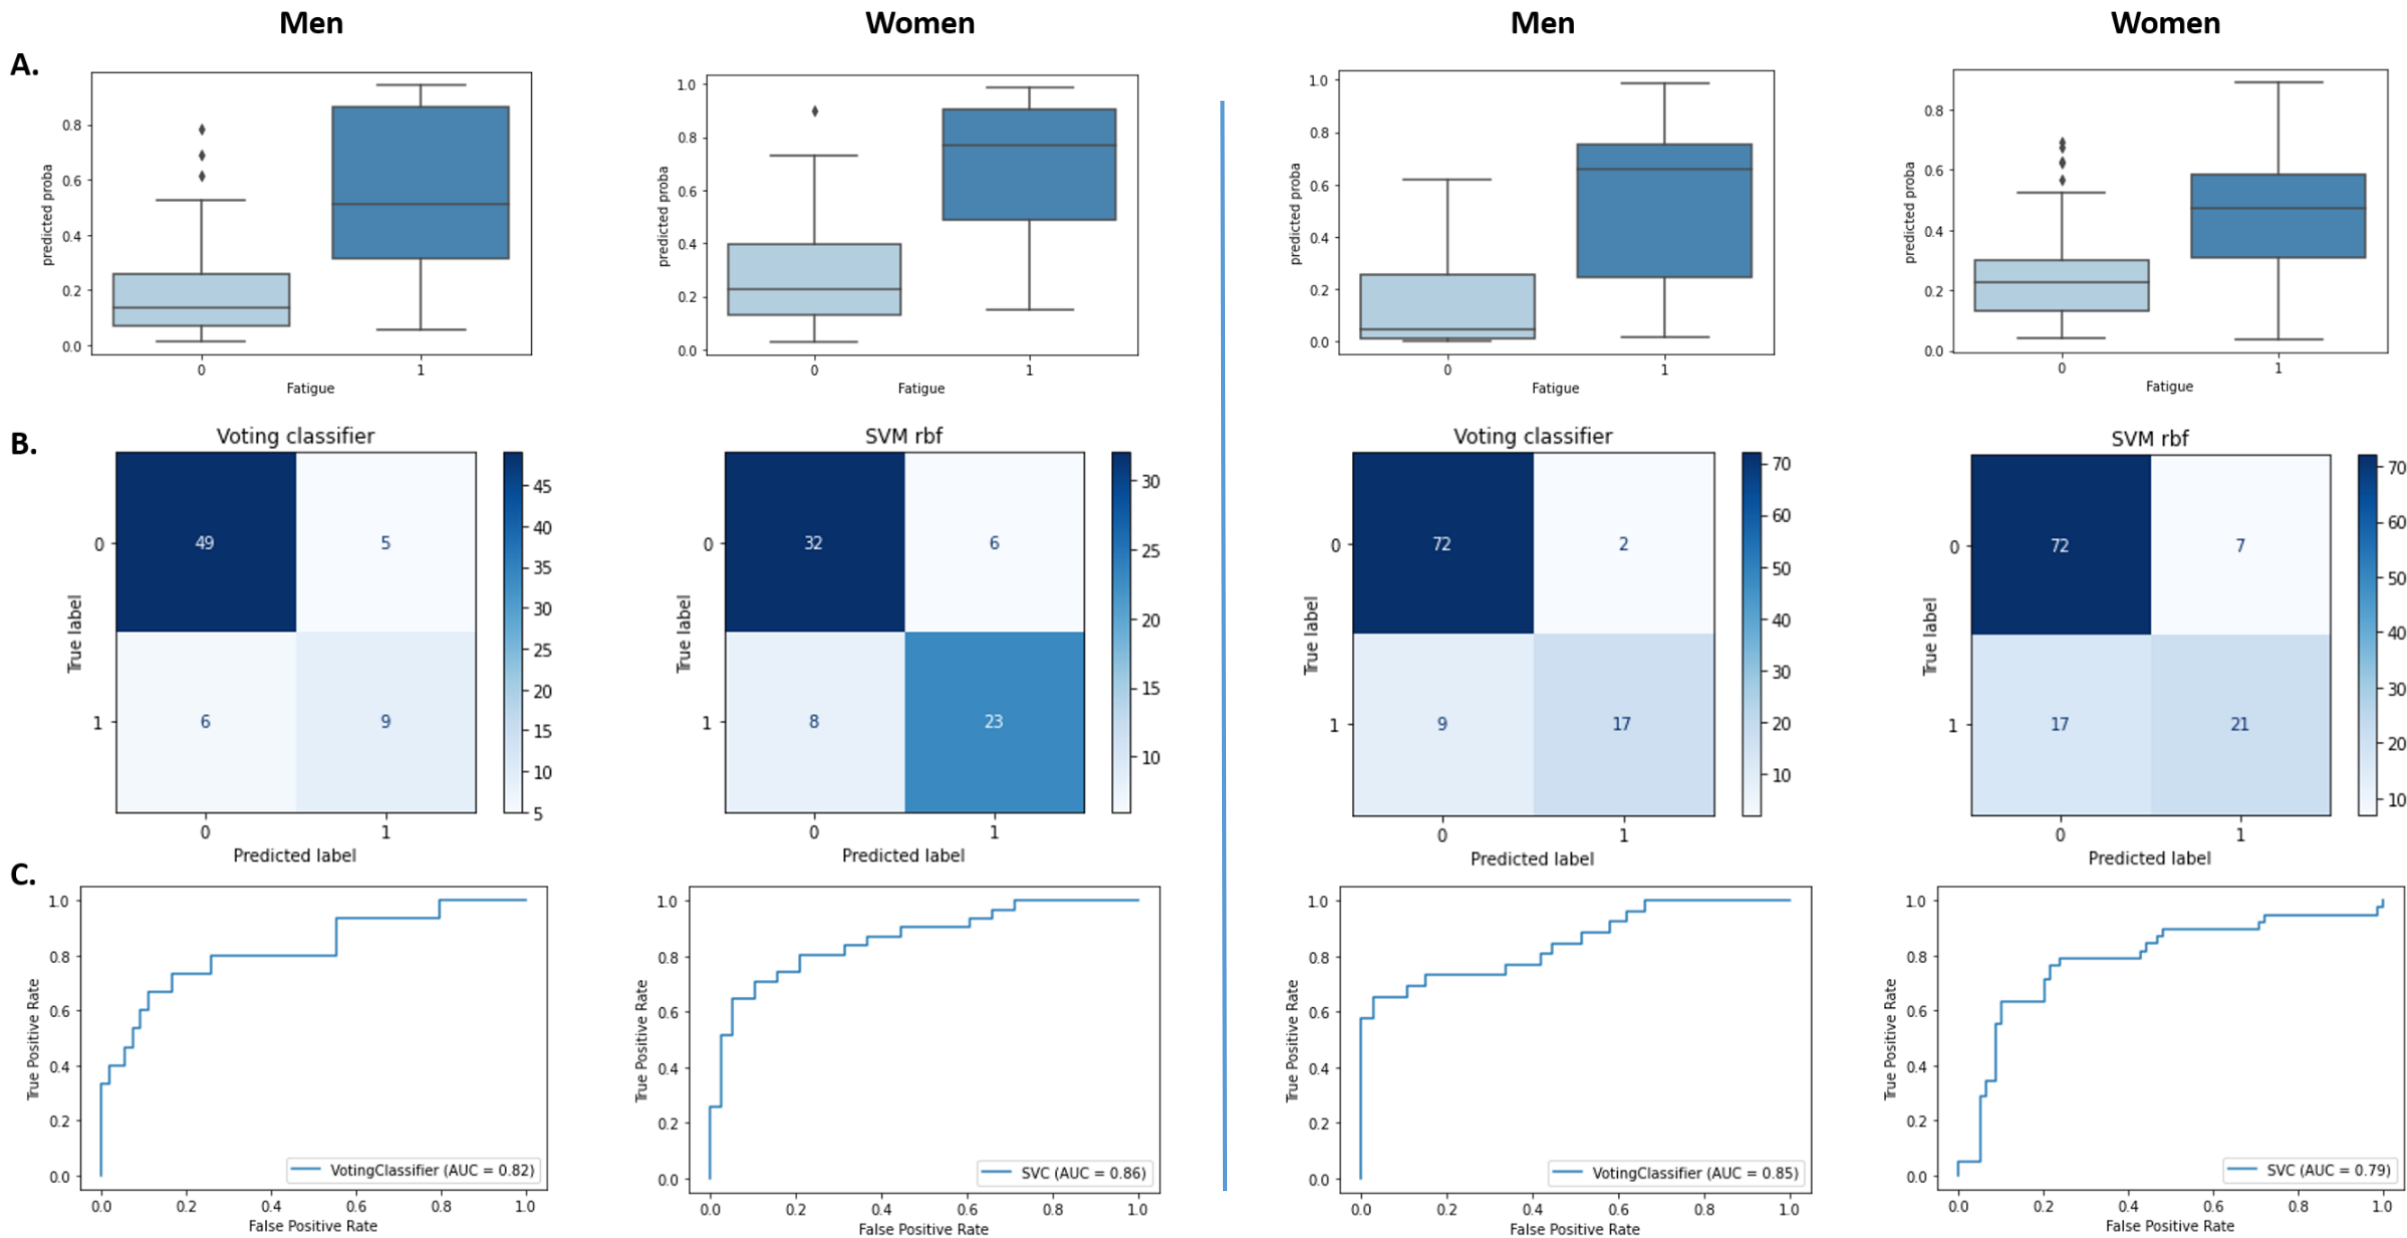

For peer review only - <http://bmjopen.bmj.com/site/about/guidelines.xhtml>  
**Figure 3a.** Derivation of the digital fatigue vocal biomarker for Android users **Figure 3b.** Derivation of the digital fatigue vocal biomarker for iOS users



1  
2  
3 **Supplementary Online Material 1. Standardized, prespecified text to be read by**  
4 **study participants to collect voice recordings.**  
5  
6  
7  
8  
9

10 Universal Declaration of Human Rights, United Nations.  
11  
12  
13

14 **English**  
15  
16  
17

18  
19 Everyone has the right to a standard of living adequate for the health and well-being  
20 of himself and of his family, including food, clothing, housing and medical care and  
21 necessary social services, and the right to security in the event of unemployment,  
22 sickness, disability, widowhood, old age or other lack of livelihood in circumstances  
23 beyond his control.  
24  
25  
26  
27  
28  
29  
30

31 **French**  
32  
33  
34  
35

36 Toute personne a droit à un niveau de vie suffisant pour assurer sa santé, son bien-  
37 être et ceux de sa famille, notamment pour l'alimentation, l'habillement, le logement,  
38 les soins médicaux ainsi que pour les services sociaux nécessaires ; elle a droit à la  
39 sécurité en cas de chômage, de maladie, d'invalidité, de veuvage, de vieillesse ou  
40 dans les autres cas de perte de ses moyens de subsistance par suite de  
41 circonstances indépendantes de sa volonté.  
42  
43  
44  
45  
46  
47  
48  
49  
50

51 **German**  
52  
53  
54  
55

56 Jeder hat das Recht auf einen Lebensstandard, der seine und seiner Familie  
57 Gesundheit und Wohl gewährleistet, einschließlich Nahrung, Kleidung, Wohnung,  
58  
59  
60

1  
2  
3 ärztliche Versorgung und notwendige soziale Leistungen gewährleistet sowie das  
4  
5 Recht auf Sicherheit im Falle von Arbeitslosigkeit, Krankheit, Invalidität oder  
6  
7 Verwitung, im Alter sowie bei anderweitigem Verlust seiner Unterhaltsmittel durch  
8  
9 unverschuldete Umstände.  
10  
11  
12

### 13 **Portuguese**

14  
15  
16  
17  
18 Toda a pessoa tem direito a um nível de vida suficiente para lhe assegurar e à sua  
19  
20 família a saúde e o bem-estar, principalmente quanto à alimentação, ao vestuário,  
21  
22 ao alojamento, à assistência médica e ainda quanto aos serviços sociais  
23  
24 necessários, e tem direito à segurança no desemprego, na doença, na invalidez, na  
25  
26 viuvez, na velhice ou noutros casos de perda de meios de subsistência por  
27  
28 circunstâncias independentes da sua vontade.  
29  
30  
31  
32  
33  
34  
35  
36  
37  
38  
39  
40  
41  
42  
43  
44  
45  
46  
47  
48  
49  
50  
51  
52  
53  
54  
55  
56  
57  
58  
59  
60

## Supplementary Online Material 2. VGG19 extracted features from participants' audio recordings

VGG19 extracted features from male participants' audio recordings



VGG19 extracted features from female participants' audio recordings



The scatter plot of the 250 relevant components given by PCA reduction revealed two distinct clusters. These two groups appeared to characterize the audio formats, m4a (iOS users) and 3gp (Android users).

It was consequently hypothesized that our data was heterogeneous and that it would be preferable to fit the models with each audio format independently.

For peer review only - <http://bmjopen.bmj.com/site/about/guidelines.xhtml>

## TRIPOD Checklist: Prediction Model Development and Validation

| Section/Topic                | Item | Checklist Item | Page   |
|------------------------------|------|----------------|--------|
| <b>Title and abstract</b>    |      |                |        |
| Title                        | 1    | D;V            | 1      |
| Abstract                     | 2    | D;V            | 2      |
| <b>Introduction</b>          |      |                |        |
| Background and objectives    | 3a   | D;V            | 4      |
|                              | 3b   | D;V            | 5      |
| <b>Methods</b>               |      |                |        |
| Source of data               | 4a   | D;V            | 5      |
|                              | 4b   | D;V            |        |
| Participants                 | 5a   | D;V            | 6      |
|                              | 5b   | D;V            |        |
|                              | 5c   | D;V            |        |
| Outcome                      | 6a   | D;V            | 9      |
|                              | 6b   | D;V            |        |
| Predictors                   | 7a   | D;V            | 8      |
|                              | 7b   | D;V            |        |
| Sample size                  | 8    | D;V            | 7      |
| Missing data                 | 9    | D;V            |        |
| Statistical analysis methods | 10a  | D              | 8      |
|                              | 10b  | D              |        |
|                              | 10c  | V              |        |
|                              | 10d  | D;V            |        |
|                              | 10e  | V              |        |
| Risk groups                  | 11   | D;V            |        |
| Development vs. validation   | 12   | V              | 9      |
| <b>Results</b>               |      |                |        |
| Participants                 | 13a  | D;V            | 9      |
|                              | 13b  | D;V            |        |
|                              | 13c  | V              |        |
| Model development            | 14a  | D              | 9      |
|                              | 14b  | D              |        |
| Model specification          | 15a  | D              | 10     |
|                              | 15b  | D              |        |
| Model performance            | 16   | D;V            | 10     |
| Model-updating               | 17   | V              |        |
| <b>Discussion</b>            |      |                |        |
| Limitations                  | 18   | D;V            | 11     |
| Interpretation               | 19a  | V              | 10     |
|                              | 19b  | D;V            |        |
| Implications                 | 20   | D;V            | 12     |
| <b>Other information</b>     |      |                |        |
| Supplementary information    | 21   | D;V            | 5,6,10 |
| Funding                      | 22   | D;V            | 3      |

\*Items relevant only to the development of a prediction model are denoted by D, items relating solely to a validation of a prediction model are denoted by V, and items relating to both are denoted D;V. We recommend using the TRIPOD Checklist in conjunction with the TRIPOD Explanation and Elaboration document.

# BMJ Open

## Vocal biomarker predicts fatigue in people with COVID-19: results from the prospective Predi-COVID cohort study

|                                 |                                                                                                                                                                                                                                                                                                                                                                                                                                                                                                                                                                                                                                                                                    |
|---------------------------------|------------------------------------------------------------------------------------------------------------------------------------------------------------------------------------------------------------------------------------------------------------------------------------------------------------------------------------------------------------------------------------------------------------------------------------------------------------------------------------------------------------------------------------------------------------------------------------------------------------------------------------------------------------------------------------|
| Journal:                        | <i>BMJ Open</i>                                                                                                                                                                                                                                                                                                                                                                                                                                                                                                                                                                                                                                                                    |
| Manuscript ID                   | bmjopen-2022-062463.R2                                                                                                                                                                                                                                                                                                                                                                                                                                                                                                                                                                                                                                                             |
| Article Type:                   | Original research                                                                                                                                                                                                                                                                                                                                                                                                                                                                                                                                                                                                                                                                  |
| Date Submitted by the Author:   | 20-Oct-2022                                                                                                                                                                                                                                                                                                                                                                                                                                                                                                                                                                                                                                                                        |
| Complete List of Authors:       | Elbéji, Abir; Luxembourg Institute of Health, Department of Precision Health<br>Zhang, Lu; Luxembourg Institute of Health, Department of Precision Health<br>Higa, Eduardo; Luxembourg Institute of Health, Department of Precision Health<br>Fischer, Aurélie; Luxembourg Institute of Health, Departement of Population Health<br>Despotovic, Vladimir; Luxembourg Institute of Health, Department of Precision Health<br>Nazarov, Petr V.; Luxembourg Institute of Health, Department of Precision Health<br>Aguayo, Gloria; Luxembourg Institute of Health, Department of Population Health<br>Fagherazzi, Guy; Luxembourg Institute of Health, Department of Precision Health |
| <b>Primary Subject Heading</b>: | Health informatics                                                                                                                                                                                                                                                                                                                                                                                                                                                                                                                                                                                                                                                                 |
| Secondary Subject Heading:      | Global health                                                                                                                                                                                                                                                                                                                                                                                                                                                                                                                                                                                                                                                                      |
| Keywords:                       | COVID-19, Health informatics < BIOTECHNOLOGY & BIOINFORMATICS, Public health < INFECTIOUS DISEASES                                                                                                                                                                                                                                                                                                                                                                                                                                                                                                                                                                                 |
|                                 |                                                                                                                                                                                                                                                                                                                                                                                                                                                                                                                                                                                                                                                                                    |

SCHOLARONE™  
Manuscripts



I, the Submitting Author has the right to grant and does grant on behalf of all authors of the Work (as defined in the below author licence), an exclusive licence and/or a non-exclusive licence for contributions from authors who are: i) UK Crown employees; ii) where BMJ has agreed a CC-BY licence shall apply, and/or iii) in accordance with the terms applicable for US Federal Government officers or employees acting as part of their official duties; on a worldwide, perpetual, irrevocable, royalty-free basis to BMJ Publishing Group Ltd ("BMJ") its licensees and where the relevant Journal is co-owned by BMJ to the co-owners of the Journal, to publish the Work in this journal and any other BMJ products and to exploit all rights, as set out in our [licence](#).

The Submitting Author accepts and understands that any supply made under these terms is made by BMJ to the Submitting Author unless you are acting as an employee on behalf of your employer or a postgraduate student of an affiliated institution which is paying any applicable article publishing charge ("APC") for Open Access articles. Where the Submitting Author wishes to make the Work available on an Open Access basis (and intends to pay the relevant APC), the terms of reuse of such Open Access shall be governed by a Creative Commons licence – details of these licences and which [Creative Commons](#) licence will apply to this Work are set out in our licence referred to above.

Other than as permitted in any relevant BMJ Author's Self Archiving Policies, I confirm this Work has not been accepted for publication elsewhere, is not being considered for publication elsewhere and does not duplicate material already published. I confirm all authors consent to publication of this Work and authorise the granting of this licence.

1  
2  
3 **Vocal biomarker predicts fatigue in people with COVID-19: results from the**  
4 **prospective Predi-COVID cohort study**

5  
6 Abir Elbéji<sup>1</sup>, Lu Zhang<sup>2</sup>, Eduardo Higa<sup>1</sup>, Aurélie Fischer<sup>1</sup>, Vladimir Despotovic<sup>2</sup>, Petr V.  
7 Nazarov<sup>2</sup>, Gloria A. Aguayo<sup>1</sup>, Guy Fagherazzi<sup>1</sup>  
8  
9

10  
11  
12 1. Deep Digital Phenotyping Research Unit. Department of Precision Health.  
13 Luxembourg Institute of Health, 1 A-B rue Thomas Edison, L-1445 Strassen,  
14 Luxembourg  
15  
16

17  
18 2. Bioinformatics Platform. Luxembourg Institute of Health, 1A-B, rue Thomas Edison,  
19 L-1445 Strassen, Luxembourg  
20  
21

22  
23  
24  
25 **Reprints and correspondence:**

26 Dr Guy Fagherazzi, PhD, ADR

27 Director of Department of Precision Health

28 Head of the Deep Digital Phenotyping Research Unit

29  
30  
31 Luxembourg Institute of Health

32  
33 1 AB rue Thomas Edison, L-1445 STRASSEN, LUXEMBOURG

34  
35 Phone: +352 6 21 58 95 54

36  
37 Email: [guy.fagherazzi@lih.lu](mailto:guy.fagherazzi@lih.lu)

38  
39 Website: <https://ddp.lih.lu/>  
40  
41  
42  
43  
44  
45  
46  
47  
48  
49  
50  
51  
52  
53  
54  
55  
56  
57  
58  
59  
60

## Abstract

---

### Objective

To develop a vocal biomarker for fatigue monitoring in people with COVID-19.

**Design** Prospective cohort study.

**Setting** Predi-COVID data between May 2020 and May 2021.

### Participants

A total of 1772 voice recordings was used to train an AI-based algorithm to predict fatigue, stratified by gender and smartphone's operating system (Android/iOS). The recordings were collected from 296 participants tracked for two weeks following SARS-CoV-2 infection.

### primary and secondary outcome measures

Four machine learning algorithms (Logistic regression, k-nearest neighbors, support vector machine, and soft voting classifier) were used to train and derive the fatigue vocal biomarker. The models were evaluated based on the following metrics: Area Under the ROC curve (AUC), accuracy, F1-score, precision, and recall. The Brier score was also used to evaluate the models' calibrations.

### Results

The final study population included 56% of women and had a mean ( $\pm$ SD) age of 40 ( $\pm$ 13) years. Women were more likely to report fatigue ( $P<.001$ ). We developed four models for Android female, Android male, iOS female, and iOS male users with a weighted AUC of 86%, 82%, 79%, 85%, and a mean Brier Score of 0.15, 0.12, 0.17, 0.12, respectively. The vocal biomarker derived from the prediction models successfully discriminated COVID-19 participants with and without fatigue.

### Conclusions

This study demonstrates the feasibility of identifying and remotely monitoring fatigue thanks to voice. Vocal biomarkers, digitally integrated into telemedicine technologies, are expected to improve the monitoring of people with COVID-19 or Long-COVID.

---

**ClinicalTrials.gov Identifier: NCT04380987**



### Strengths and limitations

-This is the first study supporting the hypothesis that fatigue can be accurately monitored based on voice in people with COVID-19.

-The analyses were based on a multilingual database of standardized voice recordings collected in real-life from people with confirmed SARS-CoV-2 infection as determined by PCR.

-There is no similar dataset available yet in the literature to replicate our findings.

-The vocal biomarker is trained on a binary outcome (Fatigue, Yes/No) and does not reflect the entire spectrum of fatigue severity. Further work should be performed in that direction.

## Introduction

Coronavirus disease 2019 (COVID-19) is a global outbreak. More than 199 million confirmed cases of COVID-19 have been detected worldwide as of 4 August 2021, with more than 4 million deaths reported by the World Health Organization<sup>1</sup>. The worldwide population and healthcare systems have been greatly impacted by the COVID-19 pandemic. The pandemic has essentially put whole healthcare systems under pressure, requiring national or regional lockdowns<sup>2</sup>. Finding solutions that allow healthcare providers to focus on the more important and urgent patients, was, and still is, critical.

This outbreak continues to impact people, with many patients suffering from a range of acute symptoms, such as fatigue. Fatigue is a common symptom in patients with COVID-19 that can impact their quality of life, treatment adherence, and can be associated with numerous complications<sup>3</sup>. Recent findings showed that fatigue is a major symptom of the frequently reported Long-COVID syndrome. After recovering from the acute disease caused by the SARS outbreak, up to 60% of patients reported chronic fatigue 12 months later<sup>4</sup>. This supports the need for long-term monitoring solutions for these patients.

In general, fatigue can be of two types: physical and mental<sup>5</sup> experiencing lack of energy, inability to start and perform everyday activities, and lack of desire to do things. In the context of COVID-19, determinants of fatigue were categorized as both central and psychological factors, the latest might also be indirectly caused by pandemic-related fear and anxiety<sup>6,7</sup>.

Fatigue affects men and women differently and has previously been shown to be reported differently in the two genders. Men and women have different anatomy and physiology, resulting in significant sex differences in fatigability<sup>8</sup>.

Telemedicine, artificial intelligence (AI), and big data predictive analytics are examples of digital health technologies that have the potential to minimize the damaging effects of COVID-19 by improving responses to public health problems at a population level<sup>9</sup>. Using telemonitoring technologies to enable self-surveillance and remote monitoring of symptoms might therefore help to improve and personalize COVID-19 care delivery<sup>10</sup>.

1  
2  
3  
4  
5 Voice is a promising source of digital data since it is rich, user-friendly, inexpensive to  
6 collect, and non-invasive, and can be used to develop vocal biomarkers that  
7 characterize disease states. Previous research was mostly conducted in the field of  
8 neurodegenerative diseases, such as Parkinson's disease<sup>11</sup> and Alzheimer's  
9 disease<sup>12</sup>. There are also studies that confirm the relation of voice disorders to fatigue,  
10 e.g., in Chronic Fatigue Syndrome (CFS). Neuromuscular, neuropsychological and  
11 hormonal dysfunction associated with CFS can influence the phonation and  
12 articulation, and alter tension, viscosity and thickness of the tissue of the larynx, tongue  
13 and lips, leading to decreased voice quality<sup>13</sup>. Increased fatigue affects voice  
14 characteristics, such as pitch, word duration<sup>14</sup> and timing of articulated sounds<sup>15</sup>. Vocal  
15 changes related to fatigue are more observed in consonant sounds that require a high  
16 average airflow<sup>16</sup>.

17  
18  
19  
20  
21  
22  
23  
24  
25  
26  
27 In the context of the COVID-19 pandemic, respiratory sounds (e.g coughs, breathing,  
28 and voice) are also used as sources of information to develop COVID-19 screening  
29 tools<sup>17,18,19</sup>. However, no previous work has been devoted to investigating the  
30 association of voice with COVID-19 symptoms.

31  
32  
33  
34 We hypothesized that there is an association between fatigue and voice in patients  
35 with COVID-19 and that it is possible to train an AI-based model to identify fatigue and  
36 subsequently generate a digital vocal biomarker for fatigue monitoring. We used data  
37 from the large hybrid prospective Predi-COVID cohort study to investigate this  
38 hypothesis.

## 39 40 41 42 43 44 45 **Methods**

### 46 47 **Study design**

48 This project uses data from the Predi-COVID study<sup>20</sup>. Predi-COVID is a hybrid cohort  
49 study that started in May 2020 in Luxembourg and involved participants who should  
50 meet all of the following requirements: (1) a signed informed consent form; (2)  
51 participants with confirmed SARS-CoV-2 infection as determined by PCR at one of  
52 Luxembourg's certified laboratories; and (3) 18 years and older.

53  
54  
55  
56  
57  
58 This study combines data from the national surveillance system, which is used for  
59 virtually all COVID-19 positive patients. Biological sampling, electronic patient-

1  
2  
3 reported outcomes, and smartphone voice recording were collected to identify vocal  
4 biomarkers of respiratory syndromes and fatigue in this study. More details about the  
5 Predi-COVID study can be found elsewhere<sup>20</sup>.  
6  
7  
8  
9

10 Health Inspection collaborators made the initial phone contact with potential  
11 participants. Those who consented to participate were contacted by a qualified nurse  
12 from the Clinical and Epidemiological Investigation Center (CIEC - Luxembourg  
13 Institute of Health), who outlined the study and arranged home or hospital visits.  
14  
15  
16  
17

### 18 **Patient and Public Involvement**

19  
20 The Predi-COVID initiative was an emergency response from national research  
21 institutions grouped under 'Research Luxembourg' to fight the COVID-19 pandemic in  
22 Luxembourg and contribute to the general effort in the crisis. Therefore, for timing and  
23 safety reasons, patients with COVID-19 were not directly included to participate in the  
24 study design. However, the first participants included in Predi-COVID provided  
25 feedback on general workflow, data collection, questionnaires, and sampling, which  
26 was taken into account in an amendment to the protocol<sup>20</sup>.  
27  
28  
29  
30  
31  
32  
33

### 34 **Data collection**

35  
36 Participants were followed for up to a year using a smartphone app to collect voice  
37 data. To ensure a minimum quality level, participants were asked to record it in a quiet  
38 environment while maintaining a certain distance from the microphone, and an audio  
39 example of what was required was also provided.  
40  
41  
42  
43

44  
45 All the participants of this study were invited to record two audio types. The first, Type  
46 1 audio, required participants to read paragraph 1 of article 25 of the Declaration of  
47 Human Rights<sup>21</sup>, in their preferred language: French, German, English, or Portuguese;  
48 and the second, Type 2 audio, required them to hold the [a] vowel phonation without  
49 breathing for as long as they could (see Supplementary Online Material 1 for more  
50 details).  
51  
52  
53  
54

55  
56 Predi-COVID collects data in conformity with the German Society of Epidemiology's  
57 best practices guidelines<sup>22</sup>. To draft the manuscript, we followed the TRIPOD criteria  
58  
59  
60

1  
2  
3 for reporting AI-based model development and validation, as well as the corresponding  
4 checklist.  
5  
6  
7

8 All Predi-COVID participants recruited between May 2020 and May 2021 who reported  
9 their fatigue status (“I feel well” as “No Fatigue” and “I am fatigued”/“I don’t feel well”  
10 as “Fatigue”) on the same day as the audio recordings during the 14 days of follow-up  
11 were included in this study<sup>23</sup>. As a result, several audio recordings for a single  
12 participant were available for both audio types<sup>24</sup>.  
13  
14  
15  
16

### 17 **Audio characteristics and vocal biomarker training**

18 The audio recordings were collected in two formats, 3gp format (Android devices) and  
19 m4a format (iOS devices). Based on the smartphone’s operating system and the  
20 user’s gender (male/female), we trained one model for each category. This  
21 stratification was performed to minimize data heterogeneity and deal with sex as a  
22 potential confounding bias.  
23  
24  
25  
26  
27  
28  
29

#### 30 *Audio pre-processing*

31 All of the raw audio recordings were pre-processed (Figure 1). They were initially  
32 converted to .wav files, with audios lasting less than 2 seconds being excluded. Then,  
33 an audio clustering (DBSCAN) on basic features (duration, average, sum, and  
34 standard deviation of signal power, and fundamental frequency) was performed to  
35 detect outliers that were manually checked while excluding poor quality audios with 1)  
36 too noisy, 2) incorrect text reading, 3) type 1 and type 2 audios mixed, or 4) extended  
37 silence in the middle. Finally, peak normalization was used to boost the volume of quiet  
38 audio segments, and leading and trailing silences longer than 350 milliseconds were  
39 trimmed.  
40  
41  
42  
43  
44  
45  
46  
47  
48

#### 49 *Feature extraction*

50 We used transfer learning for the feature extraction process since it is adapted for  
51 small training databases<sup>25</sup>. Transfer learning is a technique where a model is  
52 constructed and trained with a set containing a large amount of data and then transfer  
53 and apply this learning to our dataset on top of it. It has the advantage of reducing the  
54 amount of data required while shortening training time and improving performance  
55 when compared to models built from scratch<sup>26</sup>.  
56  
57  
58  
59  
60

1  
2  
3  
4  
5 Convolutional neural networks require a fixed input size, whereas audio instances in  
6 our dataset were of variable length. To deal with this issue, Zero-padding was used to  
7 set the duration of each audio file to 50 seconds (the maximum length in our database).  
8  
9 To raise the amount of information fed to the classifiers, type 1 (text reading) and type  
10 2 ([a] phonation) audios were concatenated and used as a single input to the learning  
11 models.  
12  
13  
14  
15  
16

17 All the audio recordings were first resampled to 8kHz and then converted to Mel-  
18 spectrograms using the Librosa library in Python. The hop-length was 2048 samples,  
19 and the number of Mel coefficients was set to 196. The Mel spectrograms were passed  
20 through VGG19 convolutional neural network architecture provided by Keras, which  
21 was pre-trained on the ImageNet database<sup>27</sup>. This approach, presented in Figure 2,  
22 may be considered as a feature extraction step, as it converts audio recordings to 512  
23 feature maps, each of a size 6x6, leading to a total of 18432 features.  
24  
25  
26  
27  
28  
29

30 This large number of features is computationally expensive. Principal Component  
31 Analysis (PCA)<sup>28</sup> is therefore used for dimensionality reduction and to select the  
32 number of relevant components explaining the maximum of the variance in the data.  
33  
34  
35  
36  
37  
38  
39  
40  
41  
42  
43  
44  
45  
46  
47  
48  
49  
50  
51  
52  
53  
54  
55  
56  
57  
58  
59  
60

## Statistical analysis

We divided our data into “Fatigue” and “No Fatigue” groups based on the participant’s reported answers for the inclusion and daily fatigue assessment of Predi-COVID. To characterize participants, descriptive statistics were used, which included means, standard deviations for quantitative variables, and counts and percentages for qualitative variables. The two population groups (3gp (Android users) and m4a (iOS users)) were compared using a student test for continuous variables, and a  $\chi^2$  test for categorical variables.

A 10-fold cross-validation procedure was conducted on the training cohort participants to evaluate four classification models (logistic regression (LR), k-nearest neighbors (KNN), support vector machine (SVM), and soft voting classifier (VC), scikit-learn implementation in Python) at different regularization levels via a grid search, with the following evaluation metrics: area under the ROC curve (AUC), accuracy, F1-score, precision, and recall. The Brier score was also used to evaluate the calibration of the selected models.

The predicted probability of being classified as fatigued from the best model was considered as our final vocal biomarker, which may be used as a quantitative metric to monitor fatigue.

## Results

### Study population characteristics

The final study population is composed of 296 participants of whom 165 were women (56%), with an average age of 40 years (SD = 13). To record both audio types, 109 (37%) participants utilized Android smartphones (3gp format), whereas 187 (63%) used iOS devices (m4a format). We found no difference in the distribution of age, gender, body mass index, smoking, antibiotic usage, and asthma, between the two types of devices ( $P\text{-value} > .05$ ). The overall rate of comorbidities in this study was relatively low: there were 31 (10%) participants who used antibiotics and only 12 (4%) participants with asthma. More details are shown in Table 1.

### Table 1: Study population characteristics

The clinical data in the table above describe the overall population of the study. The total number and its percentage are used to represent all categorical data. The table below summarizes general information for describing audio data.

All p-values comparing iOS (m4a) and Android users (3gp) were calculated using chi<sup>2</sup> and Student's t-tests.

|                                                                                                |                | All         | m4a         |             | 3gp         |             | P-values<br>(m4a, 3gp) |
|------------------------------------------------------------------------------------------------|----------------|-------------|-------------|-------------|-------------|-------------|------------------------|
|                                                                                                |                |             | Female      | Male        | Female      | Male        |                        |
| <b>Participants (N)</b>                                                                        | Total          | 296         | 107         | 80          | 51          | 58          | -                      |
| <b>Age (years)</b>                                                                             | mean (SD)      | 40.3 (12.6) | 38.8 (13.4) | 42.9 (12.7) | 37.8 (11.6) | 41.5 (11.3) | 0.28                   |
| <b>Body Mass Index (kg/m<sup>2</sup>)</b>                                                      | mean (SD)      | 24.1 (4.7)  | 24.6 (5.5)  | 26.5 (4.1)  | 24.1 (3.8)  | 26.6 (4.17) | 0.95                   |
| <b>Antibiotic (%)</b>                                                                          | No             | 265 (90%)   | 93 (87%)    | 73 (91%)    | 44 (86%)    | 55 (95%)    | 0.87                   |
|                                                                                                | Yes            | 31 (10%)    | 14 (13%)    | 7 (9%)      | 7 (14%)     | 3 (5%)      |                        |
| <b>Asthma (%)</b>                                                                              | No             | 284 (96%)   | 104 (97%)   | 75 (94%)    | 47 (92%)    | 58 (100%)   | 0.82                   |
|                                                                                                | Yes            | 12 (4%)     | 3 (3%)      | 5 (6%)      | 4 (8%)      | 0 (0%)      |                        |
| <b>Smoking (%)</b>                                                                             | Never          | 199 (67%)   | 77 (72%)    | 51 (64%)    | 36 (71%)    | 35 (60%)    | 0.41                   |
|                                                                                                | Former smoker  | 53 (18%)    | 19 (18%)    | 20 (25%)    | 9 (18%)     | 13 (22%)    |                        |
|                                                                                                | Current smoker | 44 (15%)    | 11 (10%)    | 9 (11%)     | 6 (11%)     | 10 (18%)    |                        |
| <b>Audio recordings</b>                                                                        | Total          | 1772        | 584         | 499         | 345         | 344         | <0.001                 |
|                                                                                                | No Fatigue     | 1222 (69%)  | 394 (67%)   | 370 (74%)   | 190 (55%)   | 268 (78%)   |                        |
|                                                                                                | Fatigue        | 550 (31%)   | 190 (33%)   | 129 (26%)   | 155 (45%)   | 76 (22%)    |                        |
| <b>Mean (SD) and maximum of audio recording per participant in the 14-day follow-up period</b> | mean (SD)      | 6 (5)       | 6 (5)       | 6 (5)       | 6 (5)       | 6 (5)       | -                      |
|                                                                                                | max            | 16          | 14          | 16          | 15          | 14          |                        |

Participants reported their fatigue status on average 6 days during the first 14 days of follow-up, resulting in the analysis of 1772 audio recordings for each audio type (type 1 and type 2) when all inclusion criteria were met, including 550 audio recordings for



1  
2  
3 participants with fatigue. In both audio sets, women reported experiencing fatigue at a  
4 higher rate than men ( $P\text{-value}<.001$ ). Women constituted 155 (60%) of all fatigued  
5 Android users and 190 (67%) of all fatigued iOS users.  
6  
7  
8  
9

### 10 **Prediction models**

11 We reduced the extracted features from Mel-spectrograms to 250 top components  
12 with PCA, explaining 97% and 99% of the variance in the data for iOS and Android  
13 audio sets respectively. We then compared the performances of the machine learning  
14 algorithms to select the best models for the derivation of the vocal biomarkers.  
15  
16  
17  
18

19  
20 The voting classifier was the best model selected for the development of the vocal  
21 biomarker for male iOS users, with an AUC of 85% and overall accuracy, precision,  
22 recall, and f1-score of 89%. The model selected for female iOS users was SVM with  
23 an overall precision of 79% and an AUC of 79%. For male Android users, the selected  
24 model is the voting classifier with precision, recall an f1-score of 84%, and a weighted  
25 AUC of 82%. For female Android users, the SVM was selected with an overall  
26 precision of 80% and an AUC of 86%. More details are shown in Table 2.  
27  
28

29 As shown in Figure 3, the calibrations of the selected models were good (Mean Brier  
30 Scores = 0.15, 0.12, 0.17, and 0.12 respectively for Android female users, Android  
31 male users, iOS female users, and iOS male users).  
32  
33  
34  
35  
36  
37  
38

### 39 **Derivation of the digital fatigue vocal biomarker**

40 Based on the model selected for each audio set, we derived the trained vocal  
41 biomarkers which quantitatively represent the probability of being labeled as fatigued.  
42  
43  
44  
45  
46  
47  
48  
49  
50  
51  
52  
53  
54  
55  
56  
57  
58  
59  
60

**Table 2: Results of the prediction models**

The selected models were selected using Recall<sub>1</sub> and weighted AUC and are highlighted in bold. Class 0: No fatigue, Class 1: Fatigue

| Audio_format  | Gender | ML model   | Accuracy    | Ov.Precision | Precision_0 | Precision_1 | Ov.Recall   | Recall_0    | Recall_1    | Ov.f1score  | f1-score_0  | f1-score_1  | Weighted AUC |
|---------------|--------|------------|-------------|--------------|-------------|-------------|-------------|-------------|-------------|-------------|-------------|-------------|--------------|
| 3gp (Android) | Female | LR         | 0.77        | 0.77         | 0.81        | 0.73        | 0.77        | 0.76        | 0.77        | 0.77        | 0.78        | 0.75        | 0.85         |
|               |        | KNN        | 0.72        | 0.73         | 0.70        | 0.77        | 0.72        | 0.87        | 0.55        | 0.72        | 0.78        | 0.64        | 0.76         |
|               |        | <b>SVM</b> | <b>0.80</b> | <b>0.80</b>  | <b>0.80</b> | <b>0.79</b> | <b>0.80</b> | <b>0.84</b> | <b>0.74</b> | <b>0.80</b> | <b>0.82</b> | <b>0.77</b> | <b>0.86</b>  |
|               |        | VC         | 0.78        | 0.78         | 0.81        | 0.75        | 0.78        | 0.79        | 0.77        | 0.78        | 0.80        | 0.76        | 0.86         |
|               | Male   | LR         | 0.78        | 0.79         | 0.87        | 0.50        | 0.78        | 0.85        | 0.53        | 0.79        | 0.86        | 0.52        | 0.81         |
|               |        | KNN        | 0.83        | 0.83         | 0.83        | 0.80        | 0.83        | 0.98        | 0.27        | 0.79        | 0.90        | 0.40        | 0.84         |
|               |        | SVM        | 0.84        | 0.83         | 0.88        | 0.67        | 0.84        | 0.93        | 0.53        | 0.83        | 0.90        | 0.59        | 0.82         |
|               |        | <b>VC</b>  | <b>0.84</b> | <b>0.84</b>  | <b>0.89</b> | <b>0.64</b> | <b>0.84</b> | <b>0.91</b> | <b>0.60</b> | <b>0.84</b> | <b>0.90</b> | <b>0.62</b> | <b>0.82</b>  |
| m4a (iOS)     | Female | LR         | 0.72        | 0.72         | 0.80        | 0.56        | 0.72        | 0.77        | 0.61        | 0.72        | 0.79        | 0.58        | 0.75         |
|               |        | KNN        | 0.68        | 0.65         | 0.72        | 0.50        | 0.68        | 0.86        | 0.29        | 0.65        | 0.78        | 0.37        | 0.67         |
|               |        | <b>SVM</b> | <b>0.79</b> | <b>0.79</b>  | <b>0.81</b> | <b>0.75</b> | <b>0.79</b> | <b>0.91</b> | <b>0.55</b> | <b>0.79</b> | <b>0.86</b> | <b>0.64</b> | <b>0.79</b>  |
|               |        | VC         | 0.77        | 0.76         | 0.80        | 0.69        | 0.77        | 0.89        | 0.53        | 0.76        | 0.84        | 0.60        | 0.78         |
|               | Male   | LR         | 0.73        | 0.74         | 0.83        | 0.48        | 0.73        | 0.80        | 0.54        | 0.73        | 0.81        | 0.51        | 0.80         |
|               |        | KNN        | 0.89        | 0.89         | 0.89        | 0.89        | 0.89        | 0.97        | 0.65        | 0.88        | 0.93        | 0.76        | 0.81         |
|               |        | SVM        | 0.85        | 0.84         | 0.86        | 0.76        | 0.85        | 0.95        | 0.58        | 0.84        | 0.90        | 0.67        | 0.85         |
|               |        | <b>VC</b>  | <b>0.89</b> | <b>0.89</b>  | <b>0.89</b> | <b>0.89</b> | <b>0.89</b> | <b>0.97</b> | <b>0.65</b> | <b>0.88</b> | <b>0.93</b> | <b>0.76</b> | <b>0.85</b>  |

KNN: K-Nearest Neighbors, LR: Logistic Regression, Ov. : Overall, SVM: Support Vector Machine, VC: Voting Classifier

## Discussion

In this study, we built an AI-based pipeline to develop a vocal biomarker for both genders and both types of smartphones (male/female, Android/iOS) that effectively recognize fatigued and non-fatigued participants with COVID-19.

We stratified the data to prevent data heterogeneity, which is considered contamination and makes it difficult to build a reliable and consistent classification model(s), resulting in poorer prediction performance. This contamination is caused by two factors: first, significant gender differences in fatigability, since it has previously been shown that men and women experience and report fatigue differently, and second, different microphone types incorporated in both smartphone devices used by the participants (iOS and Android), which have a direct impact on the quality of the recorded audios (machine learning algorithms separate the audio formats rather than the fatigue status if there is no constant microphone. (see Supplementary Online Material 2 for more details).

With the increased interest in remote voice analysis as a noninvasive and powerful telemedicine tool, various studies have been carried out, mostly in neurological disorders (eg, Parkinson's disease<sup>11</sup> and Alzheimer's disease<sup>29</sup>) and mental health (eg, stress and depression<sup>30</sup>). Recently, a significant research effort has evolved to employ respiratory sounds for COVID-19 and the main focus was on the use of cough<sup>17,31</sup> and breathing<sup>32</sup> to develop a COVID-19 screening tool. However, no previous work has been devoted to investigating the association of voice with COVID-19 symptoms, precisely fatigue.

Fatigue is one of the commonly reported symptoms of COVID-19 and Long-COVID syndrome<sup>33</sup>, which can persist regardless of how severe COVID-19's acute stage is<sup>34</sup>. A variety of cerebral, peripheral, and psychosocial factors<sup>35,7</sup> play a role in the development of fatigue. It may also occur from chronic inflammation in the brain and at neuromuscular junctions. New evidence shows that patients with Long-COVID syndrome continue to have higher measures of blood clotting, thrombosis<sup>36</sup>, which may also explain the persistence of fatigue. COVID-19 is associated with variations in airway resistance<sup>37</sup>. This narrowing of the airway is manifested in the increase in

audible turbulence in both sighing and yawning, which is frequently associated with fatigue<sup>38</sup>.

Human voice is produced by the flow of air from the lungs through the larynx, which causes the vocal fold vibrations, generating a pulsating airstream<sup>39</sup>. The process is controlled by the laryngeal muscle activation<sup>40</sup> but involves the entire respiratory system to provide the air pressure necessary for phonation. Decreased pulmonary function in COVID-19 patients can cause reduced glottal airflow that is essential for normal voice production<sup>41</sup>. Furthermore, in case of increased fatigue, the voice production process may be additionally disturbed due to reduced laryngeal muscle tension, resulting in dysphonia that appears in up to 49% of COVID-19 patients<sup>41</sup>.

### Study Limitations

This study has several limitations. First, although our data was stratified based on gender and smartphone devices, the mix of languages might also result in different voice features subsequently, in different model performances. There is presently no comparable dataset with similar audio recordings for further external validation of our findings. Thus, more data should be collected to improve the transferability of our vocal biomarker to other populations. Second, our data labeling was only based on a qualitative self-reported fatigue status. A fatigue severity scale would allow a quantitative assessment of fatigue severity in a uniform and unbiased way throughout all participants. Finally, time series voice analysis for each participant was not included in the study. More investigation, including time series analysis, would establish a personalized baseline for each participant, potentially enhancing the performance of our vocal biomarkers.

### Conclusion

In this study, we demonstrated the association between fatigue and voice in people with COVID-19 and developed a fatigue vocal biomarker that can accurately predict the presence of fatigue. These findings suggest that vocal biomarkers, digitally incorporated into telemonitoring technologies, might be used to identify and remotely monitor this symptom in patients suffering from COVID-19 as well as other chronic diseases.

## Acknowledgments

We thank all participants that accepted to be involved in the study, members that collaborated to the launch and monitoring of the Predi-COVID cohort, as well as its scientific committee, the IT team responsible for the development of the application, and the nurses in charge of recruitment, data collection, and management on the field.

## Contributors

Elbéji and Fagherazzi had full access to all of the data in the study and took responsibility for the integrity of the data and the accuracy of the data analysis.

Fagherazzi, Zhang, and Fischer conceptualized and designed the study.

Elbéji, Zhang, Higa, Fischer, Despotovic, Nazarov, Aguayo, and Fagherazzi collected and analyzed data and contributed to the interpretation.

The statistical analysis was carried out by Elbéji, Zhang, Higa, and Fischer.

Elbéji drafted the initial manuscript. Elbéji, Zhang, Higa, Fischer, Despotovic,

Nazarov, Aguayo, and Fagherazzi critically revised the manuscript for more

important intellectual content. The funding was obtained by Fagherazzi. Fischer

provided administrative, technical, and material support. The corresponding author

certifies that all listed authors fulfill the authorship criteria and that no other authors that meet the criteria have been omitted.

## Funding Statement

The Predi-COVID study is supported by the Luxembourg National Research Fund (FNR) (Predi-COVID, grant number 14716273), the André Losch Foundation, and the Luxembourg Institute of Health.

**Competing interests:** None declared.

### Data Sharing Statement

Audio data, datasets and source code used in this study are publicly available.

Audio data available in Zenodo repository, [DOI: 10.5281/zenodo.5937844]

Datasets and source code available in Github, [https://github.com/LIHVOICE/Predi\_COVID\_Fatigue\_Vocal\_Biomarker].

### Ethics Statement

The National Research Ethics Committee of Luxembourg (study number 202003/07) provided ethics approval to the study in April 2020.

### References

- 1 WHO Coronavirus (COVID-19) Dashboard. <https://covid19.who.int> (accessed Aug 5, 2021).
- 2 Website. <https://www.oecd.org/coronavirus/policy-responses/the-territorial-impact-of-covid-19-managing-the-crisis-and-recovery-across-levels-of-government-a2c6abaf/>.
- 3 Qi R, Chen W, Liu S, *et al*. Psychological morbidities and fatigue in patients with confirmed COVID-19 during disease outbreak: prevalence and associated biopsychosocial risk factors. *medRxiv* 2020; : 2020.05.08.20031666.
- 4 Tansey CM, Louie M, Loeb M, *et al*. One-year outcomes and health care utilization in survivors of severe acute respiratory syndrome. *Arch Intern Med* 2007; **167**: 1312–20.
- 5 Neuropsychological and neurophysiological correlates of fatigue in post-acute patients with neurological manifestations of COVID-19: Insights into a challenging symptom. *J Neurol Sci* 2021; **420**: 117271.
- 6 Rudroff T, Fietsam AC, Deters JR, Bryant AD, Kamholz J. Post-COVID-19 Fatigue: Potential Contributing Factors. *Brain Sciences* 2020; **10**: 1012.
- 7 Morgul E, Bener A, Atak M, *et al*. COVID-19 pandemic and psychological fatigue in Turkey. *International Journal of Social Psychiatry*. 2021; **67**: 128–35.

- 1  
2  
3  
4  
5  
6  
7  
8  
9  
10  
11  
12  
13  
14  
15  
16  
17  
18  
19  
20  
21  
22  
23  
24  
25  
26  
27  
28  
29  
30  
31  
32  
33  
34  
35  
36  
37  
38  
39  
40  
41  
42  
43  
44  
45  
46  
47  
48  
49  
50  
51  
52  
53  
54  
55  
56  
57  
58  
59  
60
- 8 Hunter SK. Sex differences in human fatigability: mechanisms and insight to physiological responses. *Acta Physiol* 2014; **210**: 768–89.
  - 9 Gunasekeran DV, Tseng RMW, Tham Y-C, Wong TY. Applications of digital health for public health responses to COVID-19: a systematic scoping review of artificial intelligence, telehealth and related technologies. *NPJ Digital Medicine* 2021; **4**. DOI:10.1038/s41746-021-00412-9.
  - 10 DeMerle K, Angus DC, Seymour CW. Precision Medicine for COVID-19: Phenotype Anarchy or Promise Realized? *JAMA* 2021; **325**: 2041–2.
  - 11 Tracy JM, Özkanca Y, Atkins DC, Hosseini GR. Investigating voice as a biomarker: Deep phenotyping methods for early detection of Parkinson’s disease. *J Biomed Inform* 2020; **104**. DOI:10.1016/j.jbi.2019.103362.
  - 12 Laguarta J, Subirana B. Longitudinal Speech Biomarkers for Automated Alzheimer’s Detection. *Frontiers in Computer Science*. 2021; **3**. DOI:10.3389/fcomp.2021.624694.
  - 13 Cho S-W, Yin CS, Park Y-B, Park Y-J. Differences in self-rated, perceived, and acoustic voice qualities between high- and low-fatigue groups. *J Voice* 2011; **25**: 544–52.
  - 14 Whitmore J, Fisher S. Speech during sustained operations. *Speech Communication*. 1996; **20**: 55–70.
  - 15 Vollrath M. Automatic measurement of aspects of speech reflecting motor coordination. *Behavior Research Methods, Instruments, & Computers*. 1994; **26**: 35–40.
  - 16 Greeley HP, Berg J, Friets E, *et al*. Fatigue estimation using voice analysis. *Behavior Research Methods*. 2007; **39**: 610–9.
  - 17 Detection of COVID-19 from voice, cough and breathing patterns: Dataset and preliminary results. *Comput Biol Med* 2021; **138**: 104944.
  - 18 Orlandic L, Teijeiro T, Atienza D. The COUGHVID crowdsourcing dataset, a corpus for the study of large-scale cough analysis algorithms. *Scientific Data*.

- 2021; **8**. DOI:10.1038/s41597-021-00937-4.
- 19 Bartl-Pokorny KD, Pokorny FB, Batliner A, *et al*. The voice of COVID-19: Acoustic correlates of infection in sustained vowels. *J Acoust Soc Am* 2021; **149**: 4377.
- 20 Fagherazzi G, Fischer A, Betsou F, *et al*. Protocol for a prospective, longitudinal cohort of people with COVID-19 and their household members to study factors associated with disease severity: the Predi-COVID study. *BMJ Open* 2020; **10**: e041834.
- 21 United Nations. Universal Declaration of Human Rights | United Nations. <https://www.un.org/en/about-us/universal-declaration-of-human-rights> (accessed Nov 18, 2021).
- 22 Hoffmann W, Latza U, Baumeister SE, *et al*. Guidelines and recommendations for ensuring Good Epidemiological Practice (GEP): a guideline developed by the German Society for Epidemiology. *Eur J Epidemiol* 2019; **34**: 301–17.
- [dataset]23  
LIHVOICE.Predi\_COVID\_Fatigue\_Vocal\_Biomarker/Android\_audioset.csv at main · LIHVOICE/Predi\_COVID\_Fatigue\_Vocal\_Biomarker. GitHub. [https://github.com/LIHVOICE/Predi\\_COVID\\_Fatigue\\_Vocal\\_Biomarker](https://github.com/LIHVOICE/Predi_COVID_Fatigue_Vocal_Biomarker) (accessed Jan 31, 2022).
- [dataset] 24 Elbéji A, Zhang L, Higa E, *et al*. Audio recordings of COVID-19 positive individuals from the prospective Predi-COVID cohort study with their fatigue status. 2022; published online Feb 1. DOI:10.5281/zenodo.5937844.
- 25 Barman R, Deshpande S, Agarwal S, Inamdar U, Devare M. Transfer Learning for Small Dataset. 2019; published online March 26. <http://dx.doi.org/> (accessed Nov 18, 2021).
- 26 Weiss K, Khoshgoftaar TM, Wang D. A survey of transfer learning. *Journal of Big Data* 2016; **3**: 1–40.
- 27 Simonyan K, Zisserman A. Very Deep Convolutional Networks for Large-Scale Image Recognition. 2014; published online Sept 4. <http://arxiv.org/abs/1409.1556>



(accessed Aug 6, 2021).

- 28 Hasan BMS, Abdulazeez AM. A Review of Principal Component Analysis Algorithm for Dimensionality Reduction. *Journal of Soft Computing and Data Mining* 2021; **2**: 20–30.
- 29 König A, Satt A, Sorin A, *et al.* Automatic speech analysis for the assessment of patients with predementia and Alzheimer's disease. *Alzheimer's & dementia (Amsterdam, Netherlands)* 2015; **1**. DOI:10.1016/j.dadm.2014.11.012.
- 30 Zhang L, Duvvuri R, Chandra KKL, Nguyen T, Ghomi RH. Automated voice biomarkers for depression symptoms using an online cross-sectional data collection initiative. *Depress Anxiety* 2020; **37**. DOI:10.1002/da.23020.
- 31 Noninvasive Vocal Biomarker is Associated With Severe Acute Respiratory Syndrome Coronavirus 2 Infection. *Mayo Clinic Proceedings: Innovations, Quality & Outcomes* 2021; **5**: 654–62.
- 32 COVID-19 Sounds App. <http://www.covid-19-sounds.org/> (accessed Nov 18, 2021).
- 33 Goërtz YMJ, Van Herck M, Delbressine JM, *et al.* Persistent symptoms 3 months after a SARS-CoV-2 infection: the post-COVID-19 syndrome? *ERJ Open Res* 2020; **6**. DOI:10.1183/23120541.00542-2020.
- 34 Townsend L, Dyer AH, Jones K, *et al.* Persistent fatigue following SARS-CoV-2 infection is common and independent of severity of initial infection. *PLoS One* 2020; **15**: e0240784.
- 35 Arnold P, Njemini R, Vantieghem S, *et al.* Peripheral muscle fatigue in hospitalised geriatric patients is associated with circulating markers of inflammation. *Experimental Gerontology*. 2017; **95**: 128–35.
- 36 Fogarty H, Townsend L, Morrin H, *et al.* Persistent endotheliopathy in the pathogenesis of long COVID syndrome. *J Thromb Haemost* 2021; **19**. DOI:10.1111/jth.15490.
- 37 Pan S-Y, Ding M, Huang J, Cai Y, Huang Y-Z. Airway resistance variation

1  
2  
3 correlates with prognosis of critically ill COVID-19 patients: A computational fluid  
4 dynamics study. *Comput Methods Programs Biomed* 2021; **208**: 106257.

- 5  
6  
7  
8 38 Murry T. The voice and its disorders, 4th edition. By Margaret C. L. Greene, 446  
9 pp, illus, J. B. Lippincott Co., Philadelphia, PA, 1980. \$47.50. 1981.  
10 DOI:10.1002/HED.2890030517.  
11  
12  
13  
14 39 Zörner S, Kaltenbacher M, Döllinger M. Investigation of prescribed movement in  
15 fluid–structure interaction simulation for the human phonation process.  
16 *Computers & Fluids*. 2013; **86**: 133–40.  
17  
18  
19  
20 40 Yin J, Zhang Z. Laryngeal muscular control of vocal fold posturing: Numerical  
21 modeling and experimental validation. *J Acoust Soc Am* 2016; **140**: EL280.  
22  
23  
24  
25 41 Dassie-Leite AP, Gueths TP, Ribeiro VV, Pereira EC, Martins P do N, Daniel CR.  
26 Vocal Signs and Symptoms Related to COVID-19 and Risk Factors for their  
27 Persistence. *J Voice* 2021; published online Aug 11.  
28 DOI:10.1016/j.jvoice.2021.07.013.  
29  
30  
31

## 32 **Legends**

33  
34  
35 **Table 1:** Study population characteristics

36 **Table 2:** Results of the prediction models

37 **Figure 1.** General Pipeline

38 **Figure 2.** VGG19 Feature Extraction

39 **Figure 3.** Derivation of the digital fatigue vocal biomarker for Android and iOS users.

40 **SOM 1.** Text to read

41 **SOM 2.** VGG19 extracted features from participants' audio recordings  
42  
43  
44  
45  
46  
47  
48  
49  
50  
51  
52  
53  
54  
55  
56  
57  
58  
59  
60



1. Data collection

2. Data processing

3. Data Analysis

1  
2  
3  
4  
5  
6  
7  
8  
9  
10  
11  
12  
13  
14  
15  
16  
17  
18  
19  
20  
21  
22  
23  
24  
25  
26  
27  
28  
29  
30  
31  
32  
33  
34  
35  
36  
37  
38  
39  
40  
41

1  
2  
3  
4  
5  
6  
7  
8  
9  
10  
11  
12  
13  
14  
15  
16  
17  
18  
19  
20  
21  
22  
23  
24  
25  
26  
27  
28  
29  
30  
31  
32  
33  
34  
35  
36  
37  
38  
39  
40  
41



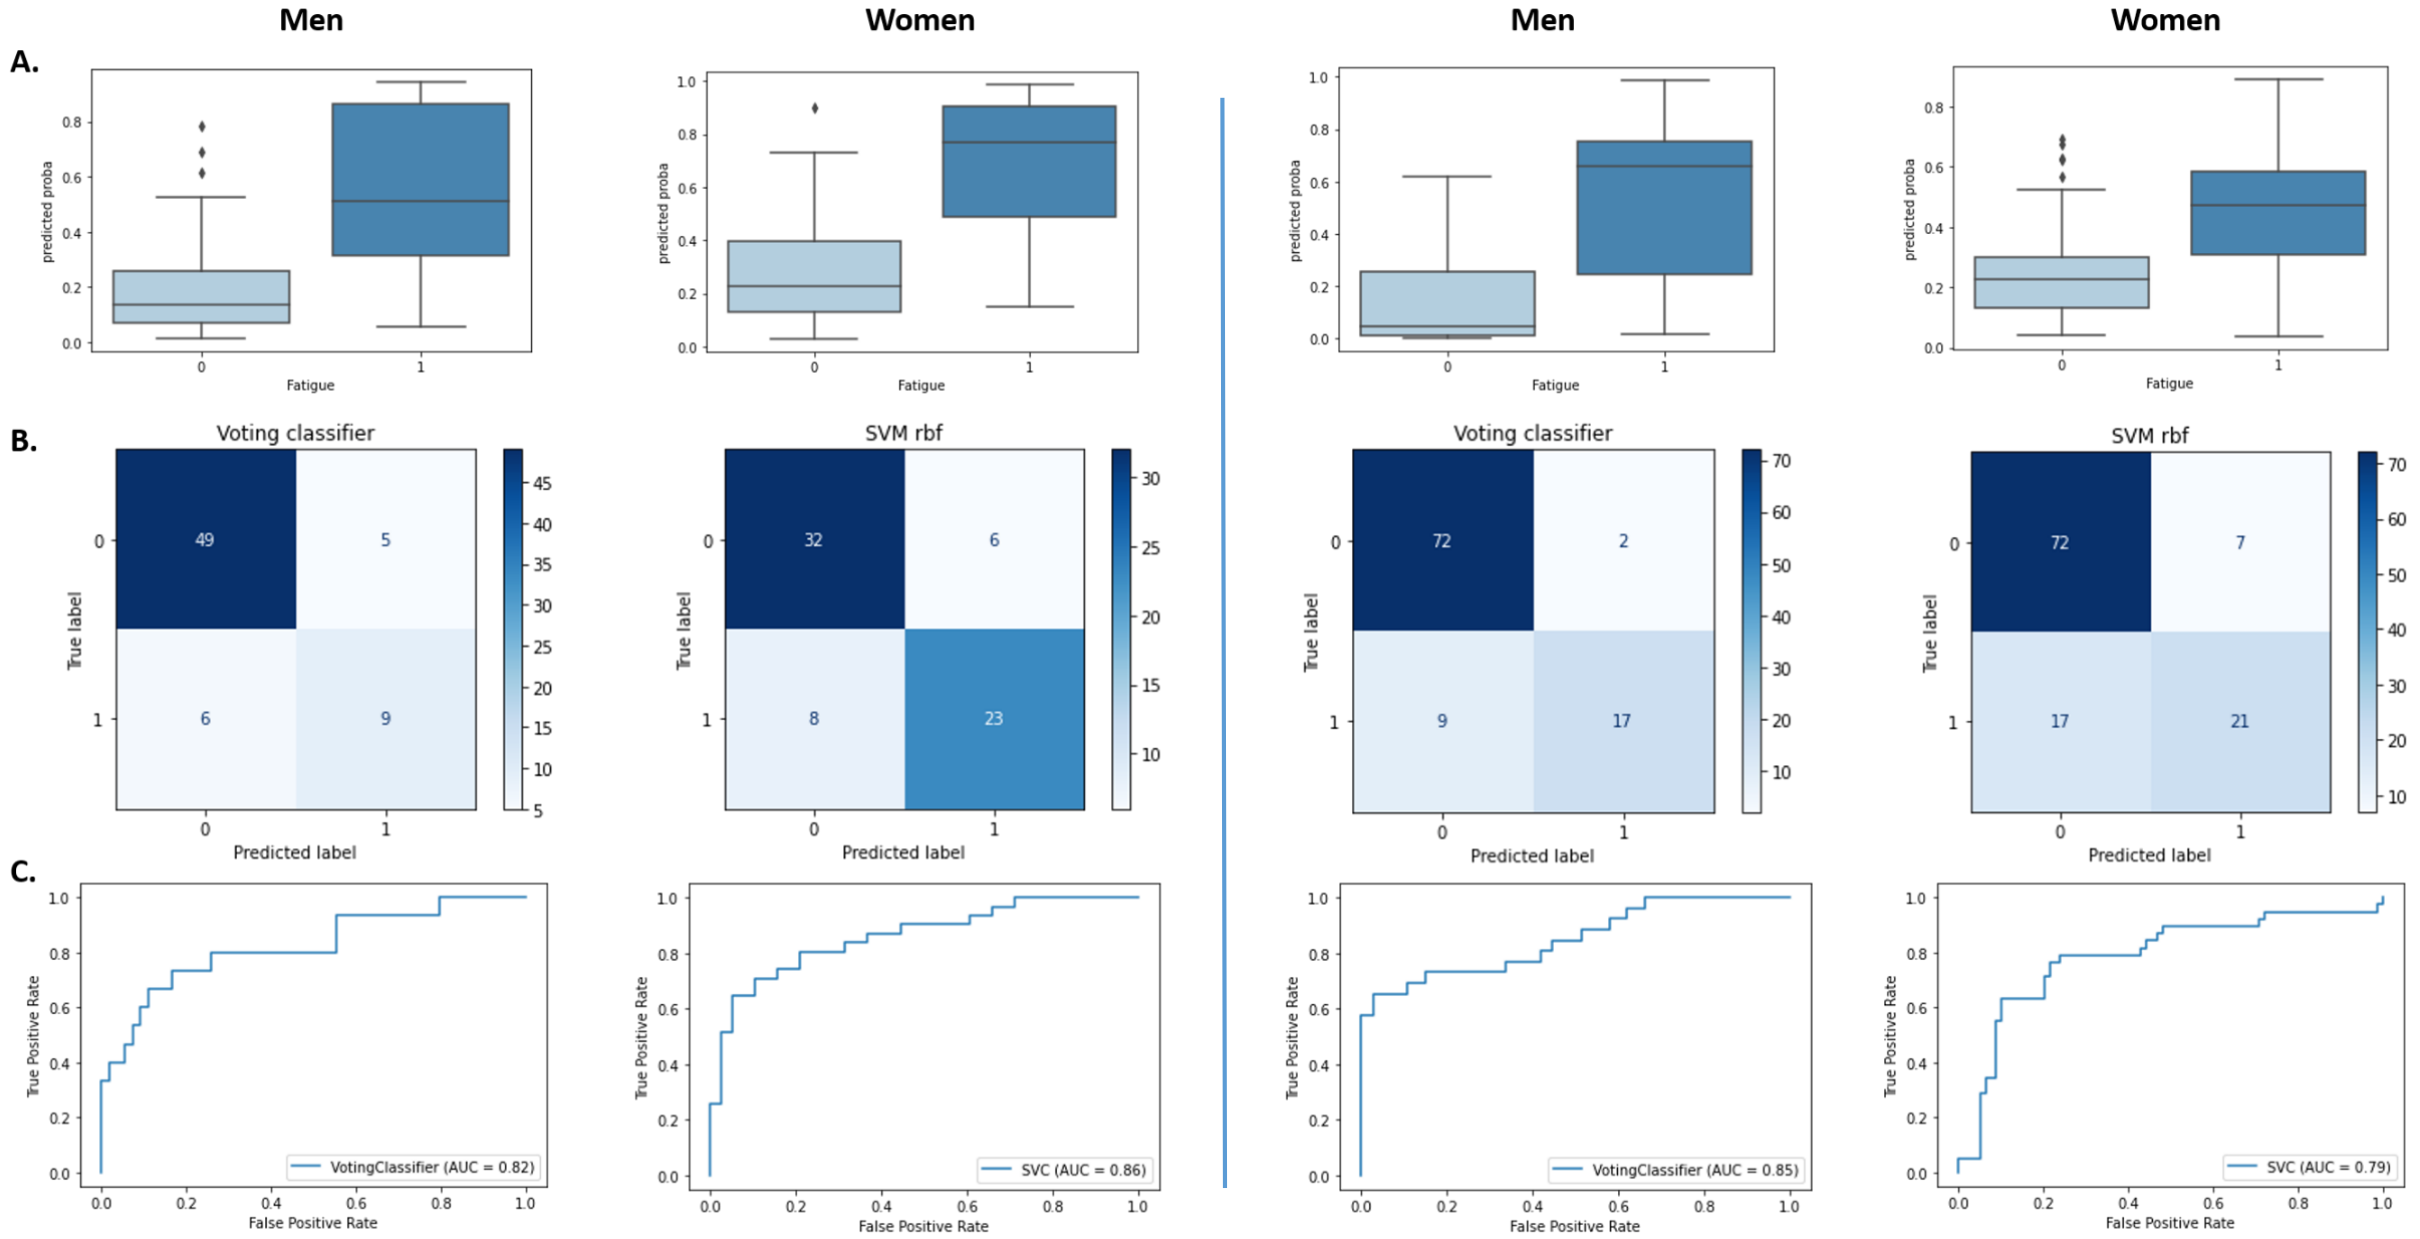

**Figure 3a.** Derivation of the digital fatigue vocal biomarker for Android users **Figure 3b.** Derivation of the digital fatigue vocal biomarker for iOS users

For peer review only - <http://bmjopen.bmj.com/site/about/guidelines.xhtml>

1  
2  
3 **Supplementary Online Material 1. Standardized, prespecified text to be read by**  
4 **study participants to collect voice recordings.**  
5  
6  
7  
8  
9

10 Universal Declaration of Human Rights, United Nations.  
11  
12  
13

14 **English**  
15  
16  
17  
18

19 Everyone has the right to a standard of living adequate for the health and well-being  
20 of himself and of his family, including food, clothing, housing and medical care and  
21 necessary social services, and the right to security in the event of unemployment,  
22 sickness, disability, widowhood, old age or other lack of livelihood in circumstances  
23 beyond his control.  
24  
25  
26  
27  
28  
29  
30  
31

32 **French**  
33  
34  
35

36 Toute personne a droit à un niveau de vie suffisant pour assurer sa santé, son bien-  
37 être et ceux de sa famille, notamment pour l'alimentation, l'habillement, le logement,  
38 les soins médicaux ainsi que pour les services sociaux nécessaires ; elle a droit à la  
39 sécurité en cas de chômage, de maladie, d'invalidité, de veuvage, de vieillesse ou  
40 dans les autres cas de perte de ses moyens de subsistance par suite de  
41 circonstances indépendantes de sa volonté.  
42  
43  
44  
45  
46  
47  
48  
49  
50  
51

52 **German**  
53  
54  
55

56 Jeder hat das Recht auf einen Lebensstandard, der seine und seiner Familie  
57 Gesundheit und Wohl gewährleistet, einschließlich Nahrung, Kleidung, Wohnung,  
58  
59  
60

1  
2  
3 ärztliche Versorgung und notwendige soziale Leistungen gewährleistet sowie das  
4  
5 Recht auf Sicherheit im Falle von Arbeitslosigkeit, Krankheit, Invalidität oder  
6  
7 Verwitkung, im Alter sowie bei anderweitigem Verlust seiner Unterhaltsmittel durch  
8  
9 unverschuldete Umstände.  
10  
11  
12

### 13 **Portuguese**

14  
15  
16  
17  
18 Toda a pessoa tem direito a um nível de vida suficiente para lhe assegurar e à sua  
19  
20 família a saúde e o bem-estar, principalmente quanto à alimentação, ao vestuário,  
21  
22 ao alojamento, à assistência médica e ainda quanto aos serviços sociais  
23  
24 necessários, e tem direito à segurança no desemprego, na doença, na invalidez, na  
25  
26 viuvez, na velhice ou noutros casos de perda de meios de subsistência por  
27  
28 circunstâncias independentes da sua vontade.  
29  
30  
31  
32  
33  
34  
35  
36  
37  
38  
39  
40  
41  
42  
43  
44  
45  
46  
47  
48  
49  
50  
51  
52  
53  
54  
55  
56  
57  
58  
59  
60

## Supplementary Online Material 2. VGG19 extracted features from participants' audio recordings

VGG19 extracted features from male participants' audio recordings



VGG19 extracted features from female participants' audio recordings



The scatter plot of the 250 relevant components given by PCA reduction revealed two distinct clusters. These two groups appeared to characterize the audio formats, m4a (iOS users) and 3gp (Android users).

It was consequently hypothesized that our data was heterogeneous and that it would be preferable to fit the models with each audio format independently.

For peer review only - <http://bmjopen.bmj.com/site/about/guidelines.xhtml>





TRIPOD Checklist: Prediction Model Development and Validation

| Section/Topic                | Item | Checklist Item                                                                                                                                                                                            | Page   |
|------------------------------|------|-----------------------------------------------------------------------------------------------------------------------------------------------------------------------------------------------------------|--------|
| <b>Title and abstract</b>    |      |                                                                                                                                                                                                           |        |
| Title                        | 1    | D;V Identify the study as developing and/or validating a multivariable prediction model, the target population, and the outcome to be predicted.                                                          | 1      |
| Abstract                     | 2    | D;V Provide a summary of objectives, study design, setting, participants, sample size, predictors, outcome, statistical analysis, results, and conclusions.                                               | 2      |
| <b>Introduction</b>          |      |                                                                                                                                                                                                           |        |
| Background and objectives    | 3a   | D;V Explain the medical context (including whether diagnostic or prognostic) and rationale for developing or validating the multivariable prediction model, including references to existing models.      | 4      |
|                              | 3b   | D;V Specify the objectives, including whether the study describes the development or validation of the model or both.                                                                                     | 5      |
| <b>Methods</b>               |      |                                                                                                                                                                                                           |        |
| Source of data               | 4a   | D;V Describe the study design or source of data (e.g., randomized trial, cohort, or registry data), separately for the development and validation data sets, if applicable.                               | 5      |
|                              | 4b   | D;V Specify the key study dates, including start of accrual; end of accrual; and, if applicable, end of follow-up.                                                                                        |        |
| Participants                 | 5a   | D;V Specify key elements of the study setting (e.g., primary care, secondary care, general population) including number and location of centres.                                                          | 6      |
|                              | 5b   | D;V Describe eligibility criteria for participants.                                                                                                                                                       |        |
|                              | 5c   | D;V Give details of treatments received, if relevant.                                                                                                                                                     |        |
| Outcome                      | 6a   | D;V Clearly define the outcome that is predicted by the prediction model, including how and when assessed.                                                                                                | 9      |
|                              | 6b   | D;V Report any actions to blind assessment of the outcome to be predicted.                                                                                                                                |        |
| Predictors                   | 7a   | D;V Clearly define all predictors used in developing or validating the multivariable prediction model, including how and when they were measured.                                                         | 8      |
|                              | 7b   | D;V Report any actions to blind assessment of predictors for the outcome and other predictors.                                                                                                            |        |
| Sample size                  | 8    | D;V Explain how the study size was arrived at.                                                                                                                                                            | 7      |
| Missing data                 | 9    | D;V Describe how missing data were handled (e.g., complete-case analysis, single imputation, multiple imputation) with details of any imputation method.                                                  |        |
| Statistical analysis methods | 10a  | D Describe how predictors were handled in the analyses.                                                                                                                                                   | 8      |
|                              | 10b  | D Specify type of model, all model-building procedures (including any predictor selection), and method for internal validation.                                                                           |        |
|                              | 10c  | V For validation, describe how the predictions were calculated.                                                                                                                                           |        |
|                              | 10d  | D;V Specify all measures used to assess model performance and, if relevant, to compare multiple models.                                                                                                   |        |
|                              | 10e  | V Describe any model updating (e.g., recalibration) arising from the validation, if done.                                                                                                                 |        |
| Risk groups                  | 11   | D;V Provide details on how risk groups were created, if done.                                                                                                                                             |        |
| Development vs. validation   | 12   | V For validation, identify any differences from the development data in setting, eligibility criteria, outcome, and predictors.                                                                           | 9      |
| <b>Results</b>               |      |                                                                                                                                                                                                           |        |
| Participants                 | 13a  | D;V Describe the flow of participants through the study, including the number of participants with and without the outcome and, if applicable, a summary of the follow-up time. A diagram may be helpful. | 9      |
|                              | 13b  | D;V Describe the characteristics of the participants (basic demographics, clinical features, available predictors), including the number of participants with missing data for predictors and outcome.    |        |
|                              | 13c  | V For validation, show a comparison with the development data of the distribution of important variables (demographics, predictors and outcome).                                                          |        |
| Model development            | 14a  | D Specify the number of participants and outcome events in each analysis.                                                                                                                                 | 9      |
|                              | 14b  | D If done, report the unadjusted association between each candidate predictor and outcome.                                                                                                                |        |
| Model specification          | 15a  | D Present the full prediction model to allow predictions for individuals (i.e., all regression coefficients, and model intercept or baseline survival at a given time point).                             | 10     |
|                              | 15b  | D Explain how to use the prediction model.                                                                                                                                                                |        |
| Model performance            | 16   | D;V Report performance measures for the prediction model.                                                                                                                                                 | 10     |
| Model-updating               | 17   | V If done, report the results from any model updating (i.e., model specification, model performance).                                                                                                     |        |
| <b>Discussion</b>            |      |                                                                                                                                                                                                           |        |
| Limitations                  | 18   | D;V Discuss any limitations of the study (such as nonrepresentative sample, few events per predictor, missing data).                                                                                      | 11     |
| Interpretation               | 19a  | V For validation, discuss the results with reference to performance in the development data, and any other validation data.                                                                               | 10     |
|                              | 19b  | D;V Give an overall interpretation of the results, considering objectives, limitations, results from similar studies, and other relevant evidence.                                                        |        |
| Implications                 | 20   | D;V Discuss the potential clinical use of the model and implications for future research.                                                                                                                 | 12     |
| <b>Other information</b>     |      |                                                                                                                                                                                                           |        |
| Supplementary information    | 21   | D;V Provide information about the availability of supplementary resources, such as study protocol, Web calculator, and data sets.                                                                         | 5,6,10 |
| Funding                      | 22   | D;V Give the source of funding and the role of the funders for the present study.                                                                                                                         | 3      |

\*Items relevant only to the development of a prediction model are denoted by D, items relating solely to a validation of a prediction model are denoted by V, and items relating to both are denoted D;V. We recommend using the TRIPOD Checklist in conjunction with the TRIPOD Explanation and Elaboration document.
